# Supplementary material for: A Meta-analysis of Gene Expression Signatures of Blood Pressure and Hypertension
Source: PLoS Genet. 2015 Mar 18;11(3):e1005035. doi: 10.1371/journal.pgen.1005035 (PMC4365001; doi:10.1371/journal.pgen.1005035)
Supplement: S1 Table — (XLSX) [file pgen.1005035.s004.xlsx]

## Sheet: Sheet1
Table S1: BP differentially expressed genes at Bonferroni corrected p<0.05 in the FHS cohort
TransID	GeneSymbol	chr	SBP_estimate	SBP_std.error	SBP_tvalue	SBP_pval	DBP_estimate	DBP_std.error	DBP_tvalue	DBP_pval	HTN_estimate	HTN_std.error	HTN_tvalue	HTN_pval
3174816	ANXA1	chr9	0.0034662	0.000373517	9.27988	2.82104e-20	0.00345574	0.000567172	6.09293	1.22293e-09	0.109316	0.0157782	6.92828	5.00833e-12
3558375	GZMB	chr14	0.00532665	0.000548309	9.71468	4.7974e-22	0.00601614	0.000832013	7.23083	5.81253e-13	0.157853	0.0231729	6.81196	1.12028e-11
2429371	TSPAN2	chr1	0.00479138	0.000421694	11.3622	1.98684e-29	0.00540303	0.000641178	8.42673	5.03563e-17	0.116086	0.0178842	6.49099	9.6676e-11
3841076	MYADM	chr19	0.00246752	0.000321741	7.66927	2.20072e-14	0.00275216	0.000487088	5.65024	1.724e-08	0.0776791	0.0135968	5.71305	1.19781e-08
2991233	AHR	chr7	0.00140728	0.000280399	5.01885	5.44476e-07	0.00153646	0.000423666	3.62658	0.000291099	0.0651714	0.0117666	5.53868	3.26139e-08
2642720	ACPP	chr3	-0.00157058	0.000337169	-4.65813	3.30391e-06	-0.00107405	0.000509947	-2.10619	0.0352556	-0.0740841	0.0141149	-5.24864	1.61905e-07
3409605	FAR2	chr12	0.00172481	0.000285121	6.04938	1.5996e-09	0.00215847	0.000430815	5.0102	5.69355e-07	0.0582217	0.0119949	4.85387	1.26114e-06
2500275	BCL2L11	chr2	-0.00102781	0.000269775	-3.80989	0.0001413	-0.000997136	0.000407353	-2.44784	0.0144179	-0.0543822	0.0113447	-4.79361	1.70292e-06
3624145	DMXL2	chr15	0.00150393	0.000271825	5.53269	3.37374e-08	0.00100167	0.00041153	2.43401	0.0149799	0.0523045	0.01141	4.58408	4.71169e-06
2660617	IL5RA	chr3	0.00179239	0.000336382	5.32845	1.05007e-07	0.00141098	0.000508846	2.77291	0.00558382	0.0633903	0.0141494	4.48008	7.68855e-06
2774971	ANTXR2	chr4	0.00142959	0.000220691	6.47781	1.05407e-10	0.00152294	0.000333719	4.56353	5.19452e-06	0.0417265	0.00931466	4.47966	7.70364e-06
3544525	FOS	chr14	0.00166617	0.000246331	6.76396	1.55591e-11	0.00109174	0.000373403	2.92376	0.00347948	0.0465038	0.0104146	4.46527	8.2372e-06
2704143	WDR49	chr3	0.00168551	0.000275095	6.127	9.89987e-10	0.00137862	0.000416086	3.3133	0.000930944	0.0518198	0.0116479	4.44887	8.88827e-06
3185498	SLC31A2	chr9	0.00241844	0.000325035	7.44057	1.24161e-13	0.00282505	0.000491859	5.74363	1.0019e-08	0.0586992	0.0137182	4.27893	1.92582e-05
2982076	TAGAP	chr6	0.00172715	0.000249993	6.90882	5.73554e-12	0.00215753	0.000377932	5.70878	1.22802e-08	0.0438722	0.0105411	4.16203	3.22666e-05
3404496	KLRF1	chr12	0.00406217	0.000700786	5.79659	7.33779e-09	0.00493825	0.00105938	4.66143	3.25169e-06	0.12186	0.0293628	4.15016	3.39771e-05
4004878	RPGR	chrX	0.00163336	0.000268624	6.08047	1.32082e-09	0.00130285	0.000406675	3.20366	0.00136853	0.04577	0.0113361	4.03754	5.51167e-05
3233049	AKR1C3	chr10	0.00245129	0.000509166	4.81433	1.53646e-06	0.00340513	0.000768565	4.4305	9.67548e-06	0.0857049	0.021401	4.00471	6.33211e-05
4017381	TSC22D3	chrX	0.00226349	0.000281269	8.04743	1.13078e-15	0.00200648	0.000426635	4.70304	2.65738e-06	0.0478507	0.0119502	4.00416	6.34686e-05
2435383	S100A10	chr1	0.00207273	0.000406417	5.1	3.56814e-07	0.00317075	0.000612894	5.1734	2.42162e-07	0.0662915	0.0171282	3.87032	0.000110579
3293435	PRF1	chr10	0.00246505	0.000412429	5.97691	2.49089e-09	0.00319169	0.000623064	5.12258	3.16884e-07	0.0671352	0.0173747	3.86396	0.000113489
3332334	MS4A14	chr11	0.00252189	0.00032471	7.76658	1.03842e-14	0.00362915	0.000490303	7.40185	1.65611e-13	0.0526465	0.0137417	3.83116	0.000129672
3554851	CRIP1	chr14	0.003657	0.000608094	6.01387	1.98855e-09	0.00401869	0.000919171	4.37209	1.26474e-05	0.0981898	0.025672	3.82479	0.000133059
2371547	C1orf21	chr1	0.00244844	0.000418597	5.84915	5.37245e-09	0.00277185	0.000632643	4.38138	1.21221e-05	0.0675338	0.0176791	3.81997	0.000135671
3282601	MPP7	chr10	0.00160261	0.000308559	5.19384	2.17189e-07	0.00172605	0.000466428	3.70057	0.000218264	0.0493559	0.0129564	3.80937	0.000141598
3944690	CYTH4	chr22	-0.00147569	0.000272971	-5.40603	6.85412e-08	-0.00129898	0.000412404	-3.14977	0.00164709	-0.0434443	0.0115725	-3.75411	0.00017665
2441220	SH2D1B	chr1	0.00372964	0.000552924	6.74531	1.76674e-11	0.00597464	0.00083379	7.16564	9.31234e-13	0.0870076	0.0232339	3.74485	0.000183265
2539387	C2orf46	chr2	0.002005	0.000368999	5.43362	5.88099e-08	0.00296509	0.000556844	5.32481	1.07115e-07	0.0566848	0.0155125	3.65413	0.000261659
3236958	VIM	chr10	0.00127944	0.000252435	5.0684	4.20943e-07	0.00173447	0.000381071	4.55157	5.49713e-06	0.0385338	0.0106531	3.61714	0.000301879
2731513	EREG	chr4	0.00173418	0.000364832	4.75337	2.07722e-06	0.000920656	0.00055182	1.6684	0.095322	0.0540372	0.0153546	3.51927	0.000437977
3558359	GZMH	chr14	0.00443131	0.000866298	5.11523	3.29378e-07	0.00406848	0.00131005	3.10558	0.00191353	0.127128	0.0364057	3.49199	0.000485087
3349293	NCAM1	chr11	0.00164783	0.000314259	5.24355	1.66396e-07	0.00243231	0.000474183	5.12948	3.05556e-07	0.0453689	0.0132329	3.4285	0.000613603
2983030	AGPAT4	chr6	0.0016406	0.000219796	7.46419	1.04078e-13	0.00144962	0.00033298	4.35347	1.37652e-05	0.0317136	0.00933913	3.39577	0.00069161
2964200	UBE2J1	chr6	-0.00176044	0.00030566	-5.75948	9.12992e-09	-0.00131219	0.000462757	-2.8356	0.00459905	-0.0436377	0.0128603	-3.39322	0.000698069
3733275	KCNJ2	chr17	-0.00215934	0.000371492	-5.81262	6.67389e-09	-0.00259619	0.00056125	-4.62573	3.86141e-06	-0.0523446	0.01566	-3.34257	0.000838378
3527864	ARHGEF40	chr14	0.00111052	0.00015711	7.06846	1.86624e-12	0.00103469	0.000238049	4.34655	1.42039e-05	0.0218671	0.00663056	3.29793	0.00098328
2434438	MCL1	chr1	0.00100278	0.00020234	4.95594	7.52309e-07	0.000742071	0.000305703	2.42743	0.0152541	0.0281241	0.00859369	3.27264	0.00107533
3404660	KLRD1	chr12	0.00308751	0.000654896	4.7145	2.51302e-06	0.00300302	0.000990153	3.03288	0.00243923	0.0877459	0.027431	3.19879	0.00139179
3464983	ATP2B1	chr12	0.00158107	0.000298858	5.29038	1.2919e-07	0.00131472	0.000452036	2.90844	0.00365418	0.0400563	0.0126029	3.17833	0.00149356
2649113	TIPARP	chr3	0.00119084	0.000225014	5.29232	1.27843e-07	0.00130336	0.000339986	3.83356	0.000128417	0.0299669	0.00951097	3.15077	0.0016415
3662808	GPR56	chr16	0.00202068	0.00034128	5.9209	3.4957e-09	0.00251829	0.000515502	4.88512	1.07776e-06	0.0454416	0.0144247	3.15026	0.00164434
3996227	TKTL1	chrX	0.00102545	0.000353414	2.90156	0.00373519	0.00250372	0.00053205	4.7058	2.62187e-06	0.0466773	0.0148906	3.13469	0.00173393
4025339	IDS	chrX	0.00121261	0.000221513	5.47422	4.68864e-08	0.00163136	0.000334359	4.87908	1.11105e-06	0.0292309	0.00937394	3.11832	0.00183293
2887309	DUSP1	chr5	0.0022262	0.000389104	5.72135	1.14127e-08	0.00127343	0.000589004	2.162	0.0306823	0.0513576	0.0165072	3.11123	0.00187739
3389330	CASP5	chr11	-0.00319403	0.000605999	-5.27069	1.43733e-07	-0.00411289	0.000915149	-4.49422	7.1976e-06	-0.0791928	0.025481	-3.10792	0.00189851
3147508	KLF10	chr8	0.00154551	0.000273126	5.65859	1.64282e-08	0.00185856	0.000412677	4.50368	6.88624e-06	0.0354521	0.0115618	3.06631	0.00218293
3838004	PPP1R15A	chr19	0.00154538	0.00025575	6.04253	1.66842e-09	0.00100725	0.000387183	2.60148	0.00931936	0.0324773	0.0108602	2.99049	0.00280377
3218528	ABCA1	chr9	-0.0029239	0.000444055	-6.58453	5.21083e-11	-0.00375671	0.000671221	-5.59683	2.34275e-08	-0.0555709	0.0186668	-2.97699	0.00292994
2362723	FCRL6	chr1	0.00238092	0.000480313	4.95701	7.48193e-07	0.00285198	0.000725403	3.93159	8.59427e-05	0.0599836	0.0202567	2.96117	0.00308433
2582124	NR4A2	chr2	0.00161018	0.000233535	6.89483	6.32143e-12	0.0016627	0.000353351	4.70551	2.62568e-06	0.0292456	0.00994939	2.93944	0.0033086
3822657	CD97	chr19	0.00168403	0.000319215	5.27552	1.40025e-07	0.00231451	0.000481717	4.80472	1.61163e-06	0.0390507	0.0135351	2.88515	0.00393511
3251393	DDIT4	chr10	0.00185637	0.000393194	4.72126	2.43136e-06	0.00160239	0.000594107	2.69713	0.00702584	0.0464851	0.016627	2.79577	0.0052046
2971801	MAN1A1	chr6	0.00170512	0.000304971	5.5911	2.42074e-08	0.00143405	0.000461352	3.10836	0.00189567	0.0357669	0.0128661	2.77993	0.0054647
2439801	CCDC19	chr1	0.0017837	0.000305875	5.83147	5.96818e-09	0.00211246	0.000462208	4.57037	5.02886e-06	0.0357515	0.0128997	2.7715	0.00560802
3167660	DNAJB5	chr9	0.00149461	0.000279237	5.35246	9.20742e-08	0.00172847	0.000421769	4.09815	4.25458e-05	0.0325527	0.0117861	2.76195	0.00577438
3847590	RFX2	chr19	0.000753109	0.000158935	4.73846	2.235e-06	0.00106507	0.000239801	4.44148	9.19726e-06	0.0185751	0.00673391	2.75844	0.00583651
2439842	TAGLN2	chr1	0.00202171	0.000413047	4.89462	1.02728e-06	0.00230511	0.000623813	3.69519	0.000222925	0.0472296	0.0174452	2.70731	0.0068145
3684486	IGSF6	chr16	-0.00147516	0.000291373	-5.06278	4.3348e-07	-0.00149284	0.000440097	-3.39206	0.000701033	-0.0312877	0.0123355	-2.53639	0.0112413
2816298	IQGAP2	chr5	0.0016617	0.000349479	4.75479	2.06277e-06	0.0024512	0.000527293	4.64864	3.45866e-06	0.0370785	0.0147085	2.5209	0.0117476
2920619	ARMC2	chr6	0.00120269	0.00023167	5.19138	2.20055e-07	0.00142766	0.000349835	4.08096	4.58034e-05	0.0245741	0.00980298	2.5068	0.0122258
3131741	RAB11FIP1	chr8	0.00173011	0.000314471	5.50165	4.01945e-08	0.00250239	0.000474522	5.27349	1.41576e-07	0.0328643	0.0132846	2.47387	0.0134108
2448382	PTGS2	chr1	-0.0017418	0.000320991	-5.42633	6.12418e-08	-0.00206176	0.000485118	-4.25003	2.19054e-05	-0.0328893	0.0134944	-2.43725	0.0148466
2970942	COL10A1	chr6	-0.00103172	0.000266045	-3.87801	0.000107157	-0.00191527	0.00040061	-4.78087	1.81378e-06	-0.0274332	0.0112855	-2.43084	0.0151114
2766219	TLR1	chr4	-0.00166079	0.000357972	-4.63944	3.61538e-06	-0.00260345	0.000540011	-4.8211	1.48552e-06	-0.0363978	0.0150495	-2.41853	0.0156317
2732273	41893	chr4	0.00155407	0.000276851	5.61336	2.13116e-08	0.00206802	0.000417789	4.94992	7.75802e-07	0.028069	0.011727	2.39354	0.0167363
2910236	EFHC1	chr6	0.00145858	0.000301667	4.83506	1.3856e-06	0.00187104	0.000455433	4.10827	4.07331e-05	0.0299163	0.0127178	2.35231	0.0187095
2608725	BHLHE40	chr3	0.00154428	0.000335483	4.60317	4.30184e-06	0.00239672	0.000505962	4.73696	2.2515e-06	0.0332354	0.0141369	2.35098	0.0187769
3060332	STEAP4	chr7	-0.00203392	0.000390637	-5.20668	2.02796e-07	-0.00260569	0.000590182	-4.41507	1.03883e-05	-0.0381413	0.0163604	-2.33132	0.0197904
2765865	RELL1	chr4	0.00159919	0.000266193	6.00764	2.06574e-09	0.00104059	0.000402988	2.5822	0.00985575	0.0250983	0.0112702	2.22696	0.0260102
2422722	TGFBR3	chr1	0.00183478	0.000388719	4.72005	2.44576e-06	0.00236187	0.000586809	4.02493	5.81406e-05	0.0364988	0.0164011	2.22539	0.0261158
3391816	USP28	chr11	0.00170594	0.000330995	5.15397	2.68461e-07	0.0023067	0.00049964	4.61672	4.03197e-06	0.0297741	0.013975	2.13053	0.0331941
3830484	FFAR2	chr19	-0.00256251	0.000545363	-4.69872	2.71391e-06	-0.00227515	0.00082385	-2.76161	0.00578037	-0.0482204	0.0230478	-2.09219	0.0364898
2352758	HIPK1	chr1	0.00144397	0.000279237	5.17112	2.45117e-07	0.00225266	0.000420743	5.354	9.13016e-08	0.0234409	0.0118526	1.9777	0.0480371
2633256	ST3GAL6	chr3	-0.00156345	0.000312127	-5.00902	5.72814e-07	-0.00184849	0.000471592	-3.91967	9.02854e-05	-0.0249455	0.0131614	-1.89535	0.058124
3185522	SLC31A1	chr9	0.00160899	0.000339715	4.73631	2.25873e-06	0.00161672	0.000513369	3.14924	0.00165011	0.026649	0.0143207	1.86088	0.062841
3258260	EXOC6	chr10	-0.00126656	0.000267123	-4.74149	2.20203e-06	-0.00174701	0.000403062	-4.33434	1.50114e-05	-0.0204202	0.0112747	-1.81114	0.0702002
3406329	PTPRO	chr12	-0.001305	0.000233759	-5.58266	2.5401e-08	-0.000953857	0.000353579	-2.69772	0.00701361	-0.0167341	0.00990435	-1.68957	0.0911943
2664452	ANKRD28	chr3	0.00125055	0.000264158	4.7341	2.28333e-06	0.0013416	0.000399105	3.36153	0.000783044	0.0182923	0.0111253	1.64421	0.100218
3028966	TAS2R40	chr7	-0.00323233	0.000633304	-5.10392	3.49558e-07	-0.00503961	0.000955177	-5.2761	1.3959e-07	-0.0411361	0.0267291	-1.539	0.123891
3151970	MTSS1	chr8	0.00160688	0.000367289	4.37497	1.24819e-05	0.00278134	0.000553628	5.02383	5.30617e-07	0.0162967	0.0154804	1.05273	0.292535
3875195	MCM8	chr20	0.000966471	0.000273788	3.52999	0.000420668	0.00199508	0.000412301	4.8389	1.35927e-06	0.0113963	0.0115618	0.985686	0.324352
3862108	CLC	chr19	-0.00124917	0.000574161	-2.17564	0.0296454	-0.00406421	0.000863985	-4.70403	2.64462e-06	-0.00596723	0.0242277	-0.246298	0.805465
2968652	SESN1	chr6	0.000646306	0.000281417	2.29661	0.0216971	0.00207075	0.000423394	4.89082	1.04719e-06	0.000432097	0.0118416	0.0364896	0.970894
