# Supplementary material for: A Meta-analysis of Gene Expression Signatures of Blood Pressure and Hypertension
Source: PLoS Genet. 2015 Mar 18;11(3):e1005035. doi: 10.1371/journal.pgen.1005035 (PMC4365001; doi:10.1371/journal.pgen.1005035)
Supplement: S2 Table — (XLSX) [file pgen.1005035.s005.xlsx]

## Sheet: Sheet1
Table S2: BP signature genes at Bonferroni corrected p<0.05 with cis/trans eQTLs
SNPs	TransID	Gene	Signature	Chr	snp.pos.hg19	cis_trans	pval.GWAS.SBP	pval.GWAS.DBP	Disease.Trait	Reported.Gene.s.	GWASCatalog.p.Value
rs10000042	2448382	PTGS2	DBP_meta_BF05	chr4	5237152	trans	0.515	0.173	NA	NA	NA
rs10000154	2774971	ANTXR2	DBP_meta_BF05	chr4	80666077	cis	0.678	0.822	NA	NA	NA
rs10000250	2761734	FBXL5	DBP_meta_BF05	chr4	15482477	cis	0.461	0.402	NA	NA	NA
rs10000339	2774971	ANTXR2	DBP_meta_BF05	chr4	80878580	cis	0.0905	0.0907	NA	NA	NA
rs10001565	2761734	FBXL5	DBP_meta_BF05	chr4	15722573	cis	0.721	0.731	NA	NA	NA
rs10002171	2761734	FBXL5	DBP_meta_BF05	chr4	15767752	cis	0.62	0.797	NA	NA	NA
rs10003338	2761734	FBXL5	DBP_meta_BF05	chr4	15397178	cis	0.185	0.274	NA	NA	NA
rs10004852	2774971	ANTXR2	DBP_meta_BF05	chr4	80771131	cis	0.816	0.804	NA	NA	NA
rs10008294	2774971	ANTXR2	DBP_meta_BF05	chr4	80816695	cis	0.772	0.893	NA	NA	NA
rs10008376	2761734	FBXL5	DBP_meta_BF05	chr4	15623955	cis	0.0312	0.0114	NA	NA	NA
rs10008633	2774971	ANTXR2	DBP_meta_BF05	chr4	80570408	cis	0.722	0.437	NA	NA	NA
rs10008889	2761734	FBXL5	DBP_meta_BF05	chr4	15624519	cis	0.345	0.172	NA	NA	NA
rs10008975	2761734	FBXL5	DBP_meta_BF05	chr4	15624571	cis	0.0274	0.0104	NA	NA	NA
rs10010275	2761734	FBXL5	DBP_meta_BF05	chr4	15369617	cis	0.59	0.749	NA	NA	NA
rs10011562	2774971	ANTXR2	DBP_meta_BF05	chr4	80799867	cis	0.508	0.105	NA	NA	NA
rs10012656	2774971	ANTXR2	DBP_meta_BF05	chr4	80940592	cis	0.307	0.295	NA	NA	NA
rs10013583	2761837	FGFBP2	SBP_meta_BF05	chr4	15990000	cis	0.653	0.96	NA	NA	NA
rs10014970	2774971	ANTXR2	DBP_meta_BF05	chr4	80770939	cis	0.788	0.899	NA	NA	NA
rs10016073	2761734	FBXL5	DBP_meta_BF05	chr4	15797704	cis	0.838	0.211	NA	NA	NA
rs10016948	2761734	FBXL5	DBP_meta_BF05	chr4	15798745	cis	0.853	0.193	NA	NA	NA
rs10017222	2761734	FBXL5	DBP_meta_BF05	chr4	15623418	cis	0.18	0.189	NA	NA	NA
rs10018756	2761734	FBXL5	DBP_meta_BF05	chr4	15723792	cis	0.962	0.963	NA	NA	NA
rs10019008	2761734	FBXL5	DBP_meta_BF05	chr4	15743573	cis	0.66	0.892	NA	NA	NA
rs10020270	2761837	FGFBP2	SBP_meta_BF05	chr4	16460247	cis	0.37	0.553	NA	NA	NA
rs10020408	2761734	FBXL5	DBP_meta_BF05	chr4	15543011	cis	0.312	0.191	NA	NA	NA
rs10020809	2774971	ANTXR2	DBP_meta_BF05	chr4	80805430	cis	0.485	0.0997	NA	NA	NA
rs10022530	2761734	FBXL5	DBP_meta_BF05	chr4	15475100	cis	0.467	0.461	NA	NA	NA
rs10022610	2761734	FBXL5	DBP_meta_BF05	chr4	15637487	cis	0.339	0.175	NA	NA	NA
rs10023688	2774971	ANTXR2	DBP_meta_BF05	chr4	80896411	cis	0.11	0.0843	NA	NA	NA
rs10024167	2774971	ANTXR2	DBP_meta_BF05	chr4	80931875	cis	0.127	0.087	NA	NA	NA
rs10025605	2774971	ANTXR2	DBP_meta_BF05	chr4	80958053	cis	NA	NA	NA	NA	NA
rs10025837	2761734	FBXL5	DBP_meta_BF05	chr4	15549985	cis	0.376	0.153	NA	NA	NA
rs10029133	2774971	ANTXR2	DBP_meta_BF05	chr4	80938489	cis	0.3	0.294	NA	NA	NA
rs10029973	2761734	FBXL5	DBP_meta_BF05	chr4	15648085	cis	0.26	0.043	NA	NA	NA
rs1003107	2435383	S100A10	DBP_meta_BF05	chr1	151862296	cis	0.939	0.54	NA	NA	NA
rs10031299	2774971	ANTXR2	DBP_meta_BF05	chr4	80753792	cis	0.858	0.853	NA	NA	NA
rs10032458	2774971	ANTXR2	DBP_meta_BF05	chr4	80939596	cis	0.125	0.103	NA	NA	NA
rs10032941	2761734	FBXL5	DBP_meta_BF05	chr4	15402115	cis	0.172	0.222	NA	NA	NA
rs10033082	2761734	FBXL5	DBP_meta_BF05	chr4	15402242	cis	0.716	0.632	NA	NA	NA
rs10033596	2774971	ANTXR2	DBP_meta_BF05	chr4	80887556	cis	0.288	0.593	NA	NA	NA
rs10034735	2761734	FBXL5	DBP_meta_BF05	chr4	15725455	cis	0.872	0.519	NA	NA	NA
rs10035976	3868998	NKG7	SBP_meta_BF05	chr5	100718992	trans	0.158	0.061	NA	NA	NA
rs10036890	2883349	HAVCR2	DBP_meta_BF05	chr5	156433651	cis	0.33	0.119	NA	NA	NA
rs1003693	3959986	IL2RB	DBP_meta_BF05	chr22	37539188	cis	0.982	0.511	NA	NA	NA
rs1003694	3959986	IL2RB	DBP_meta_BF05	chr22	37539128	cis	0.987	0.367	NA	NA	NA
rs10038271	2883349	HAVCR2	DBP_meta_BF05	chr5	156470401	cis	0.307	0.196	NA	NA	NA
rs10049995	2774971	ANTXR2	DBP_meta_BF05	chr4	80919632	cis	0.285	0.617	NA	NA	NA
rs10050061	2774971	ANTXR2	DBP_meta_BF05	chr4	80921370	cis	0.291	0.612	NA	NA	NA
rs10050384	2883349	HAVCR2	DBP_meta_BF05	chr5	156405946	cis	0.167	0.0628	NA	NA	NA
rs10059560	2883349	HAVCR2	DBP_meta_BF05	chr5	156405784	cis	0.163	0.0606	NA	NA	NA
rs10059699	2883349	HAVCR2	DBP_meta_BF05	chr5	156466154	cis	0.172	0.0509	NA	NA	NA
rs10061463	2883349	HAVCR2	DBP_meta_BF05	chr5	156537760	cis	0.557	0.207	NA	NA	NA
rs10067589	2883349	HAVCR2	DBP_meta_BF05	chr5	156524999	cis	0.582	0.225	NA	NA	NA
rs10069131	2448382	PTGS2	DBP_meta_BF05	chr5	29326295	trans	0.463	0.665	NA	NA	NA
rs10076475	2883349	HAVCR2	DBP_meta_BF05	chr5	156422231	cis	0.894	0.671	NA	NA	NA
rs1007813	3550077	GLRX5	SBP_meta_BF05	chr14	96007810	cis	0.744	0.105	NA	NA	NA
rs10079961	2883349	HAVCR2	DBP_meta_BF05	chr5	156619180	cis	0.498	0.103	NA	NA	NA
rs10081652	3174816	ANXA1	DBP_meta_BF05	chr9	75864067	cis	0.594	0.698	NA	NA	NA
rs10081701	3185498	SLC31A2	SBP_meta_BF05/DBP_meta_BF05/HTN_meta_BF05	chr9	115971429	cis	0.386	0.676	NA	NA	NA
rs10081797	3185498	SLC31A2	SBP_meta_BF05/DBP_meta_BF05/HTN_meta_BF05	chr9	116000253	cis	0.248	0.151	NA	NA	NA
rs10084164	2508611	ARHGAP15	DBP_meta_BF05	chr2	144302613	cis	0.649	0.38	NA	NA	NA
rs10084340	2508611	ARHGAP15	DBP_meta_BF05	chr2	144303318	cis	0.571	0.284	NA	NA	NA
rs1009	2491745	GNLY	SBP_meta_BF05	chr2	85808737	cis	0.949	0.789	NA	NA	NA
rs1010	2491745	GNLY	SBP_meta_BF05	chr2	85808982	cis	0.967	0.767	NA	NA	NA
rs1010788	2491745	GNLY	SBP_meta_BF05	chr9	112890562	trans	0.954	0.889	NA	NA	NA
rs10114734	3174816	ANXA1	DBP_meta_BF05	chr9	75735118	cis	0.978	0.629	NA	NA	NA
rs10114943	3174816	ANXA1	DBP_meta_BF05	chr9	75964208	cis	0.997	0.806	NA	NA	NA
rs10114944	3174816	ANXA1	DBP_meta_BF05	chr9	75964209	cis	0.999	0.808	NA	NA	NA
rs10114952	3174816	ANXA1	DBP_meta_BF05	chr9	75923188	cis	0.809	0.734	NA	NA	NA
rs10114965	3174816	ANXA1	DBP_meta_BF05	chr9	75899358	cis	0.939	0.644	NA	NA	NA
rs10116039	3185498	SLC31A2	SBP_meta_BF05/DBP_meta_BF05/HTN_meta_BF05	chr9	116038180	cis	0.153	0.0646	NA	NA	NA
rs10117131	3174816	ANXA1	DBP_meta_BF05	chr9	75980578	cis	0.289	0.183	NA	NA	NA
rs10117396	3174816	ANXA1	DBP_meta_BF05	chr9	75901916	cis	0.81	0.633	NA	NA	NA
rs10117461	3174816	ANXA1	DBP_meta_BF05	chr9	75902188	cis	0.802	0.641	NA	NA	NA
rs10117668	3174816	ANXA1	DBP_meta_BF05	chr9	76007679	cis	0.441	0.24	NA	NA	NA
rs10118429	3185498	SLC31A2	SBP_meta_BF05/DBP_meta_BF05/HTN_meta_BF05	chr9	115946892	cis	0.36	0.715	NA	NA	NA
rs10118832	3174816	ANXA1	DBP_meta_BF05	chr9	75735618	cis	0.98	0.586	NA	NA	NA
rs10118914	3185498	SLC31A2	SBP_meta_BF05/DBP_meta_BF05/HTN_meta_BF05	chr9	115941144	cis	0.596	0.191	NA	NA	NA
rs1011966	3841076	MYADM	SBP_meta_BF05/DBP_meta_BF05/HTN_meta_BF05	chr12	113190029	trans	0.00114	0.00387	NA	NA	NA
rs10121150	3185498	SLC31A2	SBP_meta_BF05/DBP_meta_BF05/HTN_meta_BF05	chr9	116131695	cis	0.0926	0.258	NA	NA	NA
rs10121164	3185498	SLC31A2	SBP_meta_BF05/DBP_meta_BF05/HTN_meta_BF05	chr9	115918552	cis	0.188	0.328	NA	NA	NA
rs10121220	3174816	ANXA1	DBP_meta_BF05	chr9	75737640	cis	0.762	0.923	NA	NA	NA
rs10121585	3174816	ANXA1	DBP_meta_BF05	chr9	75765509	cis	0.681	0.782	NA	NA	NA
rs10121845	3185498	SLC31A2	SBP_meta_BF05/DBP_meta_BF05/HTN_meta_BF05	chr9	115989723	cis	0.242	0.15	NA	NA	NA
rs10122151	3185498	SLC31A2	SBP_meta_BF05/DBP_meta_BF05/HTN_meta_BF05	chr9	115919885	cis	0.508	0.756	NA	NA	NA
rs10124476	3174816	ANXA1	DBP_meta_BF05	chr9	75889773	cis	0.578	0.746	NA	NA	NA
rs10124652	3174816	ANXA1	DBP_meta_BF05	chr9	76024642	cis	0.325	0.206	NA	NA	NA
rs10125086	3174816	ANXA1	DBP_meta_BF05	chr9	75895703	cis	0.588	0.733	NA	NA	NA
rs1012875	2508611	ARHGAP15	DBP_meta_BF05	chr2	143747623	cis	0.521	0.311	NA	NA	NA
rs10131473	3550077	GLRX5	SBP_meta_BF05	chr14	96006016	cis	0.914	0.0777	NA	NA	NA
rs10133102	3550077	GLRX5	SBP_meta_BF05	chr14	96137348	cis	0.497	0.957	NA	NA	NA
rs10134151	3550077	GLRX5	SBP_meta_BF05	chr14	96116162	cis	0.322	0.963	NA	NA	NA
rs10134603	3558375	GZMB	HTN_meta_BF05	chr14	24904154	cis	0.877	0.717	NA	NA	NA
rs10134939	3550077	GLRX5	SBP_meta_BF05	chr14	96060358	cis	0.605	0.235	NA	NA	NA
rs10140401	3558375	GZMB	HTN_meta_BF05	chr14	24888500	cis	0.569	0.902	NA	NA	NA
rs10141371	3550077	GLRX5	SBP_meta_BF05	chr14	96111624	cis	0.283	0.893	NA	NA	NA
rs10141987	3550077	GLRX5	SBP_meta_BF05	chr14	96115415	cis	0.357	0.982	NA	NA	NA
rs10146671	3558375	GZMB	HTN_meta_BF05	chr14	24937081	cis	0.415	0.558	NA	NA	NA
rs10150417	3550077	GLRX5	SBP_meta_BF05	chr14	96070264	cis	0.869	0.405	NA	NA	NA
rs10150713	3550077	GLRX5	SBP_meta_BF05	chr14	96070587	cis	0.847	0.416	NA	NA	NA
rs10153706	2508611	ARHGAP15	DBP_meta_BF05	chr2	144019771	cis	0.897	0.463	NA	NA	NA
rs10157410	2448382	PTGS2	DBP_meta_BF05	chr1	186947224	cis	0.502	0.133	NA	NA	NA
rs10158030	2435383	S100A10	DBP_meta_BF05	chr1	151842679	cis	0.734	0.72	NA	NA	NA
rs10167018	2491745	GNLY	SBP_meta_BF05	chr2	85746699	cis	0.809	0.0757	NA	NA	NA
rs10168912	2520533	OBFC2A	DBP_meta_BF05	chr2	192531055	cis	0.404	0.243	NA	NA	NA
rs10172663	2508611	ARHGAP15	DBP_meta_BF05	chr2	143988477	cis	0.466	0.876	NA	NA	NA
rs10172667	2491745	GNLY	SBP_meta_BF05	chr2	85973618	cis	0.775	0.746	NA	NA	NA
rs10174551	2491745	GNLY	SBP_meta_BF05	chr2	85743336	cis	0.828	0.184	NA	NA	NA
rs10176686	2508611	ARHGAP15	DBP_meta_BF05	chr2	143929917	cis	0.2	0.236	NA	NA	NA
rs10179167	3174816	ANXA1	DBP_meta_BF05	chr2	133400342	trans	0.422	0.339	NA	NA	NA
rs10179195	2491745	GNLY	SBP_meta_BF05	chr2	85762761	cis	0.897	0.964	NA	NA	NA
rs10180391	2491745	GNLY	SBP_meta_BF05	chr2	85926345	cis	0.432	0.0919	NA	NA	NA
rs10180445	2491745	GNLY	SBP_meta_BF05	chr2	85926218	cis	0.406	0.089	NA	NA	NA
rs10180451	2491745	GNLY	SBP_meta_BF05	chr2	85926238	cis	0.432	0.0909	NA	NA	NA
rs10180547	2491745	GNLY	SBP_meta_BF05	chr2	85926305	cis	0.434	0.0917	NA	NA	NA
rs1018081	3174816	ANXA1	DBP_meta_BF05	chr9	76091799	cis	0.824	0.324	NA	NA	NA
rs10182351	2491745	GNLY	SBP_meta_BF05	chr2	85872285	cis	0.541	0.868	NA	NA	NA
rs10187164	2491745	GNLY	SBP_meta_BF05	chr2	85928209	cis	0.429	0.11	NA	NA	NA
rs10187424	2491745	GNLY	SBP_meta_BF05	chr2	85794297	cis	0.985	0.787	Prostate cancer	RNF181	3e-15
rs10187424	2491745	GNLY	SBP_meta_BF05	chr2	85794297	cis	0.985	0.787	Prostate cancer	GGCX	3e-15
rs10187424	2491745	GNLY	SBP_meta_BF05	chr2	85794297	cis	0.985	0.787	Prostate cancer	VAMP8	3e-15
rs10187424	2491745	GNLY	SBP_meta_BF05	chr2	85794297	cis	0.985	0.787	Prostate cancer	VAMP5	3e-15
rs10188985	2491745	GNLY	SBP_meta_BF05	chr2	85941074	cis	0.859	0.659	NA	NA	NA
rs10190585	2491745	GNLY	SBP_meta_BF05	chr2	85746568	cis	0.664	0.122	NA	NA	NA
rs10192358	2520533	OBFC2A	DBP_meta_BF05	chr2	192560825	cis	0.24	0.974	NA	NA	NA
rs10192752	2491745	GNLY	SBP_meta_BF05	chr2	85926142	cis	0.431	0.092	NA	NA	NA
rs10195682	2508611	ARHGAP15	DBP_meta_BF05	chr2	143988118	cis	0.218	0.21	NA	NA	NA
rs10197021	2508611	ARHGAP15	DBP_meta_BF05	chr2	144347964	cis	0.508	0.399	NA	NA	NA
rs10198001	2491745	GNLY	SBP_meta_BF05	chr2	85743357	cis	0.821	0.181	NA	NA	NA
rs10198569	2491745	GNLY	SBP_meta_BF05	chr2	85794415	cis	NA	NA	NA	NA	NA
rs10202153	3868998	NKG7	SBP_meta_BF05	chr2	206127438	trans	0.0225	0.0253	NA	NA	NA
rs10202197	2508611	ARHGAP15	DBP_meta_BF05	chr2	143838780	cis	0.0829	0.0527	NA	NA	NA
rs10203272	2491745	GNLY	SBP_meta_BF05	chr2	86033879	cis	0.85	0.707	NA	NA	NA
rs10203826	2491745	GNLY	SBP_meta_BF05	chr2	85926190	cis	0.433	0.0917	NA	NA	NA
rs10204426	2491745	GNLY	SBP_meta_BF05	chr2	85903908	cis	0.357	0.31	NA	NA	NA
rs10204887	2520533	OBFC2A	DBP_meta_BF05	chr2	192530811	cis	0.341	0.906	NA	NA	NA
rs10206121	2491745	GNLY	SBP_meta_BF05	chr2	85930169	cis	0.433	0.0991	NA	NA	NA
rs10206961	2491745	GNLY	SBP_meta_BF05	chr2	85814984	cis	0.677	0.929	NA	NA	NA
rs10207756	2491745	GNLY	SBP_meta_BF05	chr2	86022929	cis	0.0071	0.0311	NA	NA	NA
rs10210321	2491745	GNLY	SBP_meta_BF05	chr2	85928128	cis	0.437	0.0925	NA	NA	NA
rs10214	2761734	FBXL5	DBP_meta_BF05	chr4	15606431	cis	0.0262	0.0104	NA	NA	NA
rs10220374	3558375	GZMB	HTN_meta_BF05	chr14	25244271	cis	0.545	0.913	NA	NA	NA
rs1024310	3174816	ANXA1	DBP_meta_BF05	chr9	76010499	cis	0.984	0.297	NA	NA	NA
rs1024467	3841076	MYADM	SBP_meta_BF05/DBP_meta_BF05/HTN_meta_BF05	chr12	113187354	trans	0.000932	0.00788	NA	NA	NA
rs1024757	2761734	FBXL5	DBP_meta_BF05	chr4	15427268	cis	0.927	0.767	NA	NA	NA
rs1024758	2761734	FBXL5	DBP_meta_BF05	chr4	15427498	cis	0.144	0.142	NA	NA	NA
rs1024760	2761734	FBXL5	DBP_meta_BF05	chr4	15428182	cis	0.646	0.658	NA	NA	NA
rs10256053	3236958	VIM	DBP_meta_BF05	chr7	67929825	trans	0.191	0.676	NA	NA	NA
rs10269153	3236958	VIM	DBP_meta_BF05	chr7	67909312	trans	0.122	0.886	NA	NA	NA
rs1029728	2761837	FGFBP2	SBP_meta_BF05	chr4	15971114	cis	0.62	0.848	NA	NA	NA
rs1030862	2491745	GNLY	SBP_meta_BF05	chr2	85902569	cis	0.53	0.115	NA	NA	NA
rs1033522	2982076	TAGAP	HTN_meta_BF05/SBP_meta_BF05	chr6	159435769	cis	0.248	0.995	NA	NA	NA
rs1033768	3550077	GLRX5	SBP_meta_BF05	chr14	96034128	cis	0.362	0.0704	NA	NA	NA
rs1033769	3550077	GLRX5	SBP_meta_BF05	chr14	96034350	cis	0.339	0.862	NA	NA	NA
rs1034264	3174816	ANXA1	DBP_meta_BF05	chr9	76027946	cis	0.879	0.0977	NA	NA	NA
rs1034349	2774971	ANTXR2	DBP_meta_BF05	chr21	21535568	trans	0.18	0.83	NA	NA	NA
rs1036199	2883349	HAVCR2	DBP_meta_BF05	chr5	156531736	cis	0.534	0.199	NA	NA	NA
rs1036200	2883349	HAVCR2	DBP_meta_BF05	chr5	156531865	cis	0.528	0.207	NA	NA	NA
rs1038746	2435383	S100A10	DBP_meta_BF05	chr1	151942428	cis	0.615	0.841	NA	NA	NA
rs1038748	2435383	S100A10	DBP_meta_BF05	chr1	151942160	cis	0.984	0.863	NA	NA	NA
rs10401443	3838004	PPP1R15A	SBP_meta_BF05	chr19	49402059	cis	0.345	0.184	NA	NA	NA
rs1040206	2761837	FGFBP2	SBP_meta_BF05	chr4	16104538	cis	0.0499	0.286	NA	NA	NA
rs10402713	3838004	PPP1R15A	SBP_meta_BF05	chr19	49401940	cis	0.258	0.231	NA	NA	NA
rs10403298	3838004	PPP1R15A	SBP_meta_BF05	chr19	49409468	cis	0.73	0.409	NA	NA	NA
rs10404905	3838004	PPP1R15A	SBP_meta_BF05	chr19	49406175	cis	0.415	0.189	NA	NA	NA
rs10407647	3862108	CLC	DBP_meta_BF05	chr19	40200380	cis	0.971	0.66	NA	NA	NA
rs10409279	3862108	CLC	DBP_meta_BF05	chr19	40200508	cis	0.972	0.687	NA	NA	NA
rs10410071	3822657	CD97	SBP_meta_BF05/DBP_meta_BF05	chr19	14508385	cis	0.278	0.459	NA	NA	NA
rs10413941	3838004	PPP1R15A	SBP_meta_BF05	chr19	49347708	cis	0.14	0.0598	NA	NA	NA
rs10416097	3868998	NKG7	SBP_meta_BF05	chr19	51863101	cis	0.159	0.131	NA	NA	NA
rs10416187	3822657	CD97	SBP_meta_BF05/DBP_meta_BF05	chr19	14506327	cis	0.257	0.467	NA	NA	NA
rs10416475	3838004	PPP1R15A	SBP_meta_BF05	chr19	49381365	cis	0.369	0.122	NA	NA	NA
rs10416967	3838004	PPP1R15A	SBP_meta_BF05	chr19	49404393	cis	0.932	0.454	NA	NA	NA
rs10420053	3838004	PPP1R15A	SBP_meta_BF05	chr19	49392548	cis	0.853	0.455	NA	NA	NA
rs10421474	3862108	CLC	DBP_meta_BF05	chr19	40235008	cis	0.776	0.917	NA	NA	NA
rs10421478	3830002	GRAMD1A	SBP_meta_BF05/DBP_meta_BF05	chr19	35432938	cis	0.694	0.734	NA	NA	NA
rs10422961	3830002	GRAMD1A	SBP_meta_BF05/DBP_meta_BF05	chr19	35422808	cis	NA	NA	NA	NA	NA
rs1042328	3830002	GRAMD1A	SBP_meta_BF05/DBP_meta_BF05	chr19	35557260	cis	NA	NA	NA	NA	NA
rs1042510	2761837	FGFBP2	SBP_meta_BF05	chr4	15937526	cis	0.798	0.101	NA	NA	NA
rs1042714	2448382	PTGS2	DBP_meta_BF05	chr5	148206473	trans	0.895	0.839	NA	NA	NA
rs10428501	2761837	FGFBP2	SBP_meta_BF05	chr4	15983618	cis	0.552	0.466	NA	NA	NA
rs10429583	3174816	ANXA1	DBP_meta_BF05	chr9	75866968	cis	0.436	0.963	NA	NA	NA
rs10432477	2761837	FGFBP2	SBP_meta_BF05	chr2	175088707	trans	0.0976	0.527	NA	NA	NA
rs10432478	2761837	FGFBP2	SBP_meta_BF05	chr2	175089499	trans	0.104	0.549	NA	NA	NA
rs10433910	2774971	ANTXR2	DBP_meta_BF05	chr4	80852826	cis	0.607	0.161	NA	NA	NA
rs10435864	3185498	SLC31A2	SBP_meta_BF05/DBP_meta_BF05/HTN_meta_BF05	chr9	115950706	cis	0.551	0.174	NA	NA	NA
rs1043943	2611779	TMEM43	SBP_meta_BF05	chr3	14183410	cis	0.434	0.32	NA	NA	NA
rs1043953	2611779	TMEM43	SBP_meta_BF05	chr3	14183758	cis	0.647	0.573	NA	NA	NA
rs1044158	2491745	GNLY	SBP_meta_BF05	chr2	85826132	cis	NA	NA	NA	NA	NA
rs10461112	2761734	FBXL5	DBP_meta_BF05	chr4	15457300	cis	0.0981	0.0694	NA	NA	NA
rs10465129	3185498	SLC31A2	SBP_meta_BF05/DBP_meta_BF05/HTN_meta_BF05	chr9	115950156	cis	0.269	0.321	NA	NA	NA
rs10465189	3174816	ANXA1	DBP_meta_BF05	chr9	75932178	cis	0.82	0.368	NA	NA	NA
rs10467736	3558375	GZMB	HTN_meta_BF05	chr14	25148857	cis	0.971	0.538	NA	NA	NA
rs10467737	3558375	GZMB	HTN_meta_BF05	chr14	25148893	cis	0.909	0.591	NA	NA	NA
rs10468	2611779	TMEM43	SBP_meta_BF05	chr3	14184719	cis	0.855	0.783	NA	NA	NA
rs10468288	3662808	GPR56	SBP_meta_BF05/DBP_meta_BF05	chr16	57675438	cis	0.703	0.434	NA	NA	NA
rs1048037	2761734	FBXL5	DBP_meta_BF05	chr4	15447445	cis	0.182	0.126	NA	NA	NA
rs10481674	3185498	SLC31A2	SBP_meta_BF05/DBP_meta_BF05/HTN_meta_BF05	chr9	116102463	cis	0.983	0.786	NA	NA	NA
rs10483286	3558375	GZMB	HTN_meta_BF05	chr14	25203742	cis	0.314	0.891	NA	NA	NA
rs10484052	3550077	GLRX5	SBP_meta_BF05	chr14	96009748	cis	0.564	0.0646	NA	NA	NA
rs10488965	2761837	FGFBP2	SBP_meta_BF05	chr4	16009879	cis	0.36	0.108	NA	NA	NA
rs10488969	2761837	FGFBP2	SBP_meta_BF05	chr4	15933790	cis	0.956	0.344	NA	NA	NA
rs10488970	2761734	FBXL5	DBP_meta_BF05	chr4	15421647	cis	0.0811	0.123	NA	NA	NA
rs10489402	2448382	PTGS2	DBP_meta_BF05	chr1	186746556	cis	0.808	0.843	NA	NA	NA
rs10489403	2448382	PTGS2	DBP_meta_BF05	chr1	186752574	cis	0.91	0.771	NA	NA	NA
rs10489404	2448382	PTGS2	DBP_meta_BF05	chr1	186768597	cis	0.961	0.698	NA	NA	NA
rs10489405	2448382	PTGS2	DBP_meta_BF05	chr1	186769006	cis	0.856	0.771	NA	NA	NA
rs10489819	3550077	GLRX5	SBP_meta_BF05	chr1	118142444	trans	0.767	0.251	NA	NA	NA
rs10490961	3236958	VIM	DBP_meta_BF05	chr10	17212864	cis	0.461	0.818	NA	NA	NA
rs10494270	2435383	S100A10	DBP_meta_BF05	chr1	151907173	cis	0.583	0.708	NA	NA	NA
rs10495468	3185498	SLC31A2	SBP_meta_BF05/DBP_meta_BF05/HTN_meta_BF05	chr1	240562391	trans	0.455	0.983	NA	NA	NA
rs10496316	2491745	GNLY	SBP_meta_BF05	chr2	85747371	cis	0.698	0.156	NA	NA	NA
rs10496935	2508611	ARHGAP15	DBP_meta_BF05	chr2	143746494	cis	0.525	0.301	NA	NA	NA
rs10496936	2508611	ARHGAP15	DBP_meta_BF05	chr2	143746750	cis	NA	NA	NA	NA	NA
rs10496939	2508611	ARHGAP15	DBP_meta_BF05	chr2	143781546	cis	0.856	0.709	NA	NA	NA
rs10496941	2508611	ARHGAP15	DBP_meta_BF05	chr2	143943158	cis	0.933	0.485	NA	NA	NA
rs10496942	2508611	ARHGAP15	DBP_meta_BF05	chr2	143943446	cis	0.935	0.482	NA	NA	NA
rs10496943	2508611	ARHGAP15	DBP_meta_BF05	chr2	143953158	cis	0.95	0.49	NA	NA	NA
rs10496944	2508611	ARHGAP15	DBP_meta_BF05	chr2	143982370	cis	0.914	0.388	NA	NA	NA
rs10496945	2508611	ARHGAP15	DBP_meta_BF05	chr2	143998944	cis	0.959	0.491	NA	NA	NA
rs10496948	2508611	ARHGAP15	DBP_meta_BF05	chr2	144111453	cis	0.996	0.951	NA	NA	NA
rs10496950	2508611	ARHGAP15	DBP_meta_BF05	chr2	144372973	cis	0.0781	0.0517	NA	NA	NA
rs10497411	2761837	FGFBP2	SBP_meta_BF05	chr2	175088090	trans	0.0968	0.531	NA	NA	NA
rs10497417	2761837	FGFBP2	SBP_meta_BF05	chr2	175009066	trans	0.0828	0.464	NA	NA	NA
rs10497418	2761837	FGFBP2	SBP_meta_BF05	chr2	174975695	trans	0.0731	0.392	NA	NA	NA
rs10500844	2774971	ANTXR2	DBP_meta_BF05	chr11	19250164	trans	0.00923	0.258	NA	NA	NA
rs10503021	2982076	TAGAP	HTN_meta_BF05/SBP_meta_BF05	chr18	55756329	trans	0.0529	0.883	NA	NA	NA
rs1050305	3174816	ANXA1	DBP_meta_BF05	chr9	75775235	cis	0.219	0.632	NA	NA	NA
rs10509187	3293435	PRF1	SBP_meta_BF05/DBP_meta_BF05	chr10	65207748	trans	0.0593	0.128	NA	NA	NA
rs1050950	2508611	ARHGAP15	DBP_meta_BF05	chr2	143746849	cis	0.4	0.309	NA	NA	NA
rs1050951	2508611	ARHGAP15	DBP_meta_BF05	chr2	143746964	cis	0.669	0.772	NA	NA	NA
rs10512016	3174816	ANXA1	DBP_meta_BF05	chr9	75793246	cis	0.467	0.582	NA	NA	NA
rs10512017	3174816	ANXA1	DBP_meta_BF05	chr9	75884239	cis	0.562	0.846	NA	NA	NA
rs10512018	3174816	ANXA1	DBP_meta_BF05	chr9	75894810	cis	0.56	0.849	NA	NA	NA
rs10512019	3174816	ANXA1	DBP_meta_BF05	chr9	75951276	cis	0.979	0.431	NA	NA	NA
rs10512020	3174816	ANXA1	DBP_meta_BF05	chr9	76019998	cis	0.988	0.314	NA	NA	NA
rs10512021	3174816	ANXA1	DBP_meta_BF05	chr9	76028465	cis	0.905	0.42	NA	NA	NA
rs10512022	3174816	ANXA1	DBP_meta_BF05	chr9	76184785	cis	0.414	0.248	NA	NA	NA
rs10512023	3174816	ANXA1	DBP_meta_BF05	chr9	76189863	cis	0.828	0.549	NA	NA	NA
rs10512024	3174816	ANXA1	DBP_meta_BF05	chr9	76191829	cis	0.869	0.552	NA	NA	NA
rs10512536	3733275	KCNJ2	HTN_meta_BF05/DBP_meta_BF05	chr17	68158248	cis	0.0114	0.994	NA	NA	NA
rs10512537	3733275	KCNJ2	HTN_meta_BF05/DBP_meta_BF05	chr17	68199133	cis	0.438	0.704	NA	NA	NA
rs10513188	3185498	SLC31A2	SBP_meta_BF05/DBP_meta_BF05/HTN_meta_BF05	chr9	115950778	cis	0.271	0.137	NA	NA	NA
rs10513189	3185498	SLC31A2	SBP_meta_BF05/DBP_meta_BF05/HTN_meta_BF05	chr9	115990221	cis	0.585	0.398	NA	NA	NA
rs10513190	3185498	SLC31A2	SBP_meta_BF05/DBP_meta_BF05/HTN_meta_BF05	chr9	115993923	cis	0.573	0.286	NA	NA	NA
rs10515746	2883349	HAVCR2	DBP_meta_BF05	chr5	156536568	cis	0.571	0.219	NA	NA	NA
rs10516292	2761734	FBXL5	DBP_meta_BF05	chr4	15749703	cis	0.0395	0.184	NA	NA	NA
rs10517027	2883349	HAVCR2	DBP_meta_BF05	chr4	42472966	trans	0.406	0.387	NA	NA	NA
rs10518225	2774971	ANTXR2	DBP_meta_BF05	chr4	80666518	cis	0.709	0.989	NA	NA	NA
rs10518229	2774971	ANTXR2	DBP_meta_BF05	chr4	80636864	cis	0.931	0.672	NA	NA	NA
rs10521451	3174816	ANXA1	DBP_meta_BF05	chr9	75776652	cis	0.635	0.701	NA	NA	NA
rs10521453	3174816	ANXA1	DBP_meta_BF05	chr9	76037516	cis	0.877	0.54	NA	NA	NA
rs1053213	3830002	GRAMD1A	SBP_meta_BF05/DBP_meta_BF05	chr19	35435776	cis	0.6	0.655	NA	NA	NA
rs1053732	2434438	MCL1	SBP_meta_BF05	chr1	150597890	cis	0.146	0.634	NA	NA	NA
rs1058412	2761734	FBXL5	DBP_meta_BF05	chr4	15513147	cis	0.238	0.195	NA	NA	NA
rs1058588	2491745	GNLY	SBP_meta_BF05	chr2	85808871	cis	0.95	0.79	NA	NA	NA
rs1058678	3375735	AHNAK	SBP_meta_BF05	chr11	62361037	cis	0.0467	0.00944	NA	NA	NA
rs1060892	3830002	GRAMD1A	SBP_meta_BF05/DBP_meta_BF05	chr19	35505591	cis	0.816	0.165	NA	NA	NA
rs1072020	2761837	FGFBP2	SBP_meta_BF05	chr3	14792039	trans	NA	NA	NA	NA	NA
rs10733604	3185498	SLC31A2	SBP_meta_BF05/DBP_meta_BF05/HTN_meta_BF05	chr9	116042263	cis	0.421	0.902	NA	NA	NA
rs10733871	3293435	PRF1	SBP_meta_BF05/DBP_meta_BF05	chr10	72159318	cis	0.197	0.122	NA	NA	NA
rs10735619	3174816	ANXA1	DBP_meta_BF05	chr9	75814083	cis	0.316	0.534	NA	NA	NA
rs10735620	3174816	ANXA1	DBP_meta_BF05	chr9	75815528	cis	0.306	0.539	NA	NA	NA
rs10735622	3174816	ANXA1	DBP_meta_BF05	chr9	75991893	cis	0.652	0.782	NA	NA	NA
rs10737015	3236958	VIM	DBP_meta_BF05	chr10	17000799	cis	0.0775	0.417	NA	NA	NA
rs10737274	2448382	PTGS2	DBP_meta_BF05	chr1	186872846	cis	0.608	0.705	NA	NA	NA
rs10737277	2448382	PTGS2	DBP_meta_BF05	chr1	186947729	cis	0.941	0.561	NA	NA	NA
rs10737278	2448382	PTGS2	DBP_meta_BF05	chr1	186948027	cis	0.927	0.592	NA	NA	NA
rs10739390	3185498	SLC31A2	SBP_meta_BF05/DBP_meta_BF05/HTN_meta_BF05	chr9	115988489	cis	0.589	0.426	NA	NA	NA
rs10746916	3174816	ANXA1	DBP_meta_BF05	chr9	75810296	cis	0.353	0.606	NA	NA	NA
rs10746917	3174816	ANXA1	DBP_meta_BF05	chr9	75819945	cis	0.309	0.509	NA	NA	NA
rs10746922	3174816	ANXA1	DBP_meta_BF05	chr9	76088753	cis	0.775	0.329	NA	NA	NA
rs10746923	3174816	ANXA1	DBP_meta_BF05	chr9	76117953	cis	0.965	0.39	NA	NA	NA
rs10752064	3236958	VIM	DBP_meta_BF05	chr10	16996953	cis	0.501	0.806	NA	NA	NA
rs10752073	3236958	VIM	DBP_meta_BF05	chr10	17264486	cis	0.103	0.0538	NA	NA	NA
rs10752074	3236958	VIM	DBP_meta_BF05	chr10	17264697	cis	0.0912	0.0169	NA	NA	NA
rs10752634	2439842	TAGLN2	SBP_meta_BF05	chr1	159905268	cis	0.983	0.806	NA	NA	NA
rs10752983	2448382	PTGS2	DBP_meta_BF05	chr1	186864079	cis	0.638	0.661	NA	NA	NA
rs10752989	2448382	PTGS2	DBP_meta_BF05	chr1	186955430	cis	0.628	0.629	NA	NA	NA
rs10754699	3185498	SLC31A2	SBP_meta_BF05/DBP_meta_BF05/HTN_meta_BF05	chr1	240549316	trans	0.522	0.963	NA	NA	NA
rs10754982	2761837	FGFBP2	SBP_meta_BF05	chr2	174978203	trans	0.0859	0.428	NA	NA	NA
rs10755	3862108	CLC	DBP_meta_BF05	chr19	40199914	cis	0.952	0.64	NA	NA	NA
rs10755215	2761734	FBXL5	DBP_meta_BF05	chr4	15533037	cis	0.473	0.579	NA	NA	NA
rs10755216	2761837	FGFBP2	SBP_meta_BF05	chr4	15957568	cis	0.71	0.991	NA	NA	NA
rs10759631	3185498	SLC31A2	SBP_meta_BF05/DBP_meta_BF05/HTN_meta_BF05	chr9	115996044	cis	0.239	0.15	NA	NA	NA
rs10759632	3185498	SLC31A2	SBP_meta_BF05/DBP_meta_BF05/HTN_meta_BF05	chr9	116000983	cis	0.247	0.15	NA	NA	NA
rs10759636	3185498	SLC31A2	SBP_meta_BF05/DBP_meta_BF05/HTN_meta_BF05	chr9	116018777	cis	0.436	0.318	NA	NA	NA
rs10759637	3185498	SLC31A2	SBP_meta_BF05/DBP_meta_BF05/HTN_meta_BF05	chr9	116025024	cis	NA	NA	NA	NA	NA
rs10759638	3185498	SLC31A2	SBP_meta_BF05/DBP_meta_BF05/HTN_meta_BF05	chr9	116042492	cis	0.262	0.289	NA	NA	NA
rs10760334	3594825	PIGB	SBP_meta_BF05	chr9	126980900	trans	0.0322	0.0497	NA	NA	NA
rs10760334	3841076	MYADM	SBP_meta_BF05/DBP_meta_BF05/HTN_meta_BF05	chr9	126980900	trans	0.0322	0.0497	NA	NA	NA
rs10760336	3841076	MYADM	SBP_meta_BF05/DBP_meta_BF05/HTN_meta_BF05	chr9	126982809	trans	0.0293	0.0445	NA	NA	NA
rs10760336	3594825	PIGB	SBP_meta_BF05	chr9	126982809	trans	0.0293	0.0445	NA	NA	NA
rs10762381	3293435	PRF1	SBP_meta_BF05/DBP_meta_BF05	chr10	72206344	cis	0.313	0.163	NA	NA	NA
rs10774625	3838004	PPP1R15A	SBP_meta_BF05	chr12	111910219	trans	1.13e-09	4.31e-14	Retinal vascular caliber	SH2B3	2e-13
rs10774625	3841076	MYADM	SBP_meta_BF05/DBP_meta_BF05/HTN_meta_BF05	chr12	111910219	trans	1.13e-09	4.31e-14	Retinal vascular caliber	PTPN11	2e-13
rs10774625	2982076	TAGAP	HTN_meta_BF05/SBP_meta_BF05	chr12	111910219	trans	1.13e-09	4.31e-14	Retinal vascular caliber	ATXN2	2e-13
rs10774625	2435383	S100A10	DBP_meta_BF05	chr12	111910219	trans	1.13e-09	4.31e-14	Retinal vascular caliber	SH2B3	2e-13
rs10774625	2435383	S100A10	DBP_meta_BF05	chr12	111910219	trans	1.13e-09	4.31e-14	Retinal vascular caliber	PTPN11	2e-13
rs10774625	2435383	S100A10	DBP_meta_BF05	chr12	111910219	trans	1.13e-09	4.31e-14	Retinal vascular caliber	ATXN2	2e-13
rs10774625	2761837	FGFBP2	SBP_meta_BF05	chr12	111910219	trans	1.13e-09	4.31e-14	Retinal vascular caliber	SH2B3	2e-13
rs10774625	3841076	MYADM	SBP_meta_BF05/DBP_meta_BF05/HTN_meta_BF05	chr12	111910219	trans	1.13e-09	4.31e-14	Retinal vascular caliber	SH2B3	2e-13
rs10774625	3544525	FOS	SBP_meta_BF05	chr12	111910219	trans	1.13e-09	4.31e-14	Retinal vascular caliber	ATXN2	2e-13
rs10774625	2982076	TAGAP	HTN_meta_BF05/SBP_meta_BF05	chr12	111910219	trans	1.13e-09	4.31e-14	Retinal vascular caliber	PTPN11	2e-13
rs10774625	3838004	PPP1R15A	SBP_meta_BF05	chr12	111910219	trans	1.13e-09	4.31e-14	Retinal vascular caliber	ATXN2	2e-13
rs10774625	2761837	FGFBP2	SBP_meta_BF05	chr12	111910219	trans	1.13e-09	4.31e-14	Retinal vascular caliber	ATXN2	2e-13
rs10774625	3841076	MYADM	SBP_meta_BF05/DBP_meta_BF05/HTN_meta_BF05	chr12	111910219	trans	1.13e-09	4.31e-14	Retinal vascular caliber	ATXN2	2e-13
rs10774625	2761837	FGFBP2	SBP_meta_BF05	chr12	111910219	trans	1.13e-09	4.31e-14	Retinal vascular caliber	PTPN11	2e-13
rs10774625	3544525	FOS	SBP_meta_BF05	chr12	111910219	trans	1.13e-09	4.31e-14	Retinal vascular caliber	PTPN11	2e-13
rs10774625	3838004	PPP1R15A	SBP_meta_BF05	chr12	111910219	trans	1.13e-09	4.31e-14	Retinal vascular caliber	PTPN11	2e-13
rs10774625	2982076	TAGAP	HTN_meta_BF05/SBP_meta_BF05	chr12	111910219	trans	1.13e-09	4.31e-14	Retinal vascular caliber	SH2B3	2e-13
rs10774625	3544525	FOS	SBP_meta_BF05	chr12	111910219	trans	1.13e-09	4.31e-14	Retinal vascular caliber	SH2B3	2e-13
rs10774887	3236958	VIM	DBP_meta_BF05	chr12	117230330	trans	0.886	0.272	NA	NA	NA
rs1077636	3185498	SLC31A2	SBP_meta_BF05/DBP_meta_BF05/HTN_meta_BF05	chr9	116122326	cis	0.851	0.595	NA	NA	NA
rs10779966	2491745	GNLY	SBP_meta_BF05	chr2	85730641	cis	0.311	0.544	NA	NA	NA
rs1078004	2491745	GNLY	SBP_meta_BF05	chr2	85769711	cis	NA	NA	NA	NA	NA
rs10781113	3174816	ANXA1	DBP_meta_BF05	chr9	75717292	cis	0.901	0.628	NA	NA	NA
rs10781123	3174816	ANXA1	DBP_meta_BF05	chr9	75762442	cis	0.98	0.589	NA	NA	NA
rs10781125	3174816	ANXA1	DBP_meta_BF05	chr9	75789632	cis	0.532	0.702	NA	NA	NA
rs10781129	3174816	ANXA1	DBP_meta_BF05	chr9	75813221	cis	0.76	0.328	NA	NA	NA
rs10781130	3174816	ANXA1	DBP_meta_BF05	chr9	75824432	cis	0.708	0.535	NA	NA	NA
rs10781131	3174816	ANXA1	DBP_meta_BF05	chr9	75829027	cis	0.749	0.925	NA	NA	NA
rs10781133	3174816	ANXA1	DBP_meta_BF05	chr9	75844741	cis	0.634	0.83	NA	NA	NA
rs10781134	3174816	ANXA1	DBP_meta_BF05	chr9	75897525	cis	0.736	0.527	NA	NA	NA
rs10781135	3174816	ANXA1	DBP_meta_BF05	chr9	75905148	cis	0.767	0.507	NA	NA	NA
rs10781136	3174816	ANXA1	DBP_meta_BF05	chr9	75924202	cis	0.769	0.388	NA	NA	NA
rs10781138	3174816	ANXA1	DBP_meta_BF05	chr9	75944865	cis	0.93	0.317	NA	NA	NA
rs10781140	3174816	ANXA1	DBP_meta_BF05	chr9	75963830	cis	0.993	0.297	NA	NA	NA
rs10781141	3174816	ANXA1	DBP_meta_BF05	chr9	76007937	cis	0.992	0.316	NA	NA	NA
rs10781143	3174816	ANXA1	DBP_meta_BF05	chr9	76088422	cis	0.771	0.316	NA	NA	NA
rs10781146	3174816	ANXA1	DBP_meta_BF05	chr9	76152918	cis	0.883	0.454	NA	NA	NA
rs10781147	3174816	ANXA1	DBP_meta_BF05	chr9	76156334	cis	0.818	0.398	NA	NA	NA
rs10782460	3558375	GZMB	HTN_meta_BF05	chr14	25251661	cis	0.486	0.939	NA	NA	NA
rs10782485	3550077	GLRX5	SBP_meta_BF05	chr14	95985950	cis	0.832	0.493	NA	NA	NA
rs1078704	3550077	GLRX5	SBP_meta_BF05	chr14	96132834	cis	0.141	0.213	NA	NA	NA
rs10788813	2435383	S100A10	DBP_meta_BF05	chr1	151842485	cis	0.386	0.836	NA	NA	NA
rs10788816	2435383	S100A10	DBP_meta_BF05	chr1	151868098	cis	0.919	0.602	NA	NA	NA
rs10792343	3375735	AHNAK	SBP_meta_BF05	chr11	62075544	cis	0.000338	0.0023	NA	NA	NA
rs10792346	3375735	AHNAK	SBP_meta_BF05	chr11	62140069	cis	0.000426	0.00148	NA	NA	NA
rs10792350	3375735	AHNAK	SBP_meta_BF05	chr11	62154710	cis	0.000435	0.0014	NA	NA	NA
rs10793407	2883349	HAVCR2	DBP_meta_BF05	chr11	79734802	trans	0.535	0.123	NA	NA	NA
rs10795245	2435383	S100A10	DBP_meta_BF05	chr10	5145723	trans	0.315	0.725	NA	NA	NA
rs10795434	3236958	VIM	DBP_meta_BF05	chr10	16996966	cis	0.0755	0.391	NA	NA	NA
rs10795435	3236958	VIM	DBP_meta_BF05	chr10	17001241	cis	0.0774	0.419	NA	NA	NA
rs10795469	3236958	VIM	DBP_meta_BF05	chr10	17334935	cis	0.142	0.44	NA	NA	NA
rs10797054	2439842	TAGLN2	SBP_meta_BF05	chr1	159904888	cis	0.897	0.739	NA	NA	NA
rs10798067	2448382	PTGS2	DBP_meta_BF05	chr1	186855640	cis	0.921	0.252	NA	NA	NA
rs10798068	2448382	PTGS2	DBP_meta_BF05	chr1	186875008	cis	0.59	0.744	NA	NA	NA
rs10798069	2448382	PTGS2	DBP_meta_BF05	chr1	186875459	cis	0.619	0.72	NA	NA	NA
rs10798075	2448382	PTGS2	DBP_meta_BF05	chr1	186932211	cis	0.564	0.697	NA	NA	NA
rs10798078	2448382	PTGS2	DBP_meta_BF05	chr1	186967702	cis	0.965	0.521	NA	NA	NA
rs10802866	3185498	SLC31A2	SBP_meta_BF05/DBP_meta_BF05/HTN_meta_BF05	chr1	240541011	trans	0.371	0.906	NA	NA	NA
rs10811051	3236958	VIM	DBP_meta_BF05	chr9	18861021	trans	0.168	0.235	NA	NA	NA
rs10817441	3185498	SLC31A2	SBP_meta_BF05/DBP_meta_BF05/HTN_meta_BF05	chr9	115885060	cis	0.844	0.618	NA	NA	NA
rs10817447	3185498	SLC31A2	SBP_meta_BF05/DBP_meta_BF05/HTN_meta_BF05	chr9	115918220	cis	0.648	0.387	NA	NA	NA
rs10817449	3185498	SLC31A2	SBP_meta_BF05/DBP_meta_BF05/HTN_meta_BF05	chr9	115924973	cis	0.366	0.774	NA	NA	NA
rs10817450	3185498	SLC31A2	SBP_meta_BF05/DBP_meta_BF05/HTN_meta_BF05	chr9	115927152	cis	0.385	0.74	NA	NA	NA
rs10817451	3185498	SLC31A2	SBP_meta_BF05/DBP_meta_BF05/HTN_meta_BF05	chr9	115939474	cis	0.297	0.523	NA	NA	NA
rs10817453	3185498	SLC31A2	SBP_meta_BF05/DBP_meta_BF05/HTN_meta_BF05	chr9	115943003	cis	0.444	0.133	NA	NA	NA
rs10817454	3185498	SLC31A2	SBP_meta_BF05/DBP_meta_BF05/HTN_meta_BF05	chr9	115946500	cis	0.27	0.615	NA	NA	NA
rs10817464	3185498	SLC31A2	SBP_meta_BF05/DBP_meta_BF05/HTN_meta_BF05	chr9	115992497	cis	0.78	0.905	NA	NA	NA
rs10817470	3185498	SLC31A2	SBP_meta_BF05/DBP_meta_BF05/HTN_meta_BF05	chr9	116014409	cis	0.233	0.136	NA	NA	NA
rs10817474	3185498	SLC31A2	SBP_meta_BF05/DBP_meta_BF05/HTN_meta_BF05	chr9	116040440	cis	0.218	0.175	NA	NA	NA
rs10817475	3185498	SLC31A2	SBP_meta_BF05/DBP_meta_BF05/HTN_meta_BF05	chr9	116059054	cis	0.336	0.266	NA	NA	NA
rs10817478	3185498	SLC31A2	SBP_meta_BF05/DBP_meta_BF05/HTN_meta_BF05	chr9	116078520	cis	NA	NA	NA	NA	NA
rs10827279	3733275	KCNJ2	HTN_meta_BF05/DBP_meta_BF05	chr10	19618036	trans	0.574	0.878	NA	NA	NA
rs10847	2434438	MCL1	SBP_meta_BF05	chr1	150782797	cis	0.315	0.347	NA	NA	NA
rs10850071	3841076	MYADM	SBP_meta_BF05/DBP_meta_BF05/HTN_meta_BF05	chr12	113165852	trans	0.000761	0.00166	NA	NA	NA
rs10850075	3841076	MYADM	SBP_meta_BF05/DBP_meta_BF05/HTN_meta_BF05	chr12	113182298	trans	0.000924	0.00788	NA	NA	NA
rs10850076	3841076	MYADM	SBP_meta_BF05/DBP_meta_BF05/HTN_meta_BF05	chr12	113183486	trans	0.00112	0.00358	NA	NA	NA
rs10851588	3594825	PIGB	SBP_meta_BF05	chr15	55622590	cis	0.197	0.337	NA	NA	NA
rs10857135	2774971	ANTXR2	DBP_meta_BF05	chr4	80942772	cis	0.306	0.297	NA	NA	NA
rs10864790	2883349	HAVCR2	DBP_meta_BF05	chr1	231053063	trans	0.337	0.794	NA	NA	NA
rs10866621	2608725	BHLHE40	SBP_meta_BF05/DBP_meta_BF05	chr5	167483582	trans	0.328	0.0557	NA	NA	NA
rs10869226	3174816	ANXA1	DBP_meta_BF05	chr9	75749607	cis	0.954	0.594	NA	NA	NA
rs10869227	3174816	ANXA1	DBP_meta_BF05	chr9	75757209	cis	0.963	0.644	NA	NA	NA
rs10869229	3174816	ANXA1	DBP_meta_BF05	chr9	75768094	cis	0.959	0.986	NA	NA	NA
rs10869231	3174816	ANXA1	DBP_meta_BF05	chr9	75784327	cis	0.93	0.696	NA	NA	NA
rs10869233	3174816	ANXA1	DBP_meta_BF05	chr9	75793038	cis	0.744	0.353	NA	NA	NA
rs10869234	3174816	ANXA1	DBP_meta_BF05	chr9	75793810	cis	0.694	0.37	NA	NA	NA
rs10869235	3174816	ANXA1	DBP_meta_BF05	chr9	75795056	cis	0.716	0.359	NA	NA	NA
rs10869237	3174816	ANXA1	DBP_meta_BF05	chr9	75800805	cis	0.752	0.317	NA	NA	NA
rs10869238	3174816	ANXA1	DBP_meta_BF05	chr9	75803635	cis	0.768	0.334	NA	NA	NA
rs10869241	3174816	ANXA1	DBP_meta_BF05	chr9	75817746	cis	0.774	0.976	NA	NA	NA
rs10869242	3174816	ANXA1	DBP_meta_BF05	chr9	75824396	cis	0.993	0.499	NA	NA	NA
rs10869243	3174816	ANXA1	DBP_meta_BF05	chr9	75869898	cis	0.433	0.957	NA	NA	NA
rs10869246	3174816	ANXA1	DBP_meta_BF05	chr9	75894367	cis	0.729	0.536	NA	NA	NA
rs10869252	3174816	ANXA1	DBP_meta_BF05	chr9	75932704	cis	0.909	0.315	NA	NA	NA
rs10869254	3174816	ANXA1	DBP_meta_BF05	chr9	75976686	cis	0.928	0.263	NA	NA	NA
rs10869257	3174816	ANXA1	DBP_meta_BF05	chr9	75989592	cis	0.957	0.284	NA	NA	NA
rs10869259	3174816	ANXA1	DBP_meta_BF05	chr9	76071489	cis	0.911	0.444	NA	NA	NA
rs10869261	3174816	ANXA1	DBP_meta_BF05	chr9	76102007	cis	0.546	0.324	NA	NA	NA
rs10869265	3174816	ANXA1	DBP_meta_BF05	chr9	76146015	cis	0.894	0.471	NA	NA	NA
rs10869267	3174816	ANXA1	DBP_meta_BF05	chr9	76163150	cis	0.945	0.522	NA	NA	NA
rs10869270	3174816	ANXA1	DBP_meta_BF05	chr9	76198205	cis	0.693	0.583	NA	NA	NA
rs10873219	3558375	GZMB	HTN_meta_BF05	chr14	25101706	cis	0.989	0.647	NA	NA	NA
rs10873238	3558375	GZMB	HTN_meta_BF05	chr14	25162662	cis	0.507	0.734	NA	NA	NA
rs10888394	2434438	MCL1	SBP_meta_BF05	chr1	150749913	cis	0.538	0.777	NA	NA	NA
rs10888395	2434438	MCL1	SBP_meta_BF05	chr1	150762171	cis	0.493	0.753	NA	NA	NA
rs10888453	2435383	S100A10	DBP_meta_BF05	chr1	151896500	cis	0.855	0.648	NA	NA	NA
rs10895360	2435383	S100A10	DBP_meta_BF05	chr11	102624007	trans	0.853	0.895	NA	NA	NA
rs10897253	3375735	AHNAK	SBP_meta_BF05	chr11	62086073	cis	0.000604	0.00285	NA	NA	NA
rs10897260	3375735	AHNAK	SBP_meta_BF05	chr11	62113319	cis	0.000448	0.00181	NA	NA	NA
rs10897266	3375735	AHNAK	SBP_meta_BF05	chr11	62155112	cis	0.000363	0.00119	NA	NA	NA
rs10897267	3375735	AHNAK	SBP_meta_BF05	chr11	62157418	cis	0.000456	0.00137	NA	NA	NA
rs10897270	3375735	AHNAK	SBP_meta_BF05	chr11	62183007	cis	0.569	0.48	NA	NA	NA
rs10897271	3375735	AHNAK	SBP_meta_BF05	chr11	62187186	cis	0.879	0.438	NA	NA	NA
rs10897274	3375735	AHNAK	SBP_meta_BF05	chr11	62200369	cis	0.256	0.064	NA	NA	NA
rs10897289	3375735	AHNAK	SBP_meta_BF05	chr11	62400016	cis	0.227	0.561	NA	NA	NA
rs10899707	2883349	HAVCR2	DBP_meta_BF05	chr11	79746014	trans	0.524	0.127	NA	NA	NA
rs10904856	3236958	VIM	DBP_meta_BF05	chr10	17006385	cis	0.0674	0.419	NA	NA	NA
rs10904857	3236958	VIM	DBP_meta_BF05	chr10	17017066	cis	0.0265	0.102	NA	NA	NA
rs10904858	3236958	VIM	DBP_meta_BF05	chr10	17017088	cis	0.0266	0.102	NA	NA	NA
rs10904859	3236958	VIM	DBP_meta_BF05	chr10	17018523	cis	0.0428	0.126	NA	NA	NA
rs10904861	3236958	VIM	DBP_meta_BF05	chr10	17030775	cis	0.0138	0.0203	NA	NA	NA
rs10904886	3236958	VIM	DBP_meta_BF05	chr10	17185810	cis	0.462	0.763	NA	NA	NA
rs10904889	3236958	VIM	DBP_meta_BF05	chr10	17190181	cis	0.519	0.734	NA	NA	NA
rs10904891	3236958	VIM	DBP_meta_BF05	chr10	17198015	cis	0.475	0.758	NA	NA	NA
rs10904901	3236958	VIM	DBP_meta_BF05	chr10	17235629	cis	0.49	0.924	NA	NA	NA
rs10904905	3236958	VIM	DBP_meta_BF05	chr10	17242462	cis	0.486	0.88	NA	NA	NA
rs10904906	3236958	VIM	DBP_meta_BF05	chr10	17245212	cis	0.526	0.826	NA	NA	NA
rs10904908	3236958	VIM	DBP_meta_BF05	chr10	17260290	cis	0.132	0.137	NA	NA	NA
rs10904919	3236958	VIM	DBP_meta_BF05	chr10	17334745	cis	0.191	0.553	NA	NA	NA
rs10908750	2439842	TAGLN2	SBP_meta_BF05	chr1	159906156	cis	0.888	0.719	NA	NA	NA
rs10909625	3558375	GZMB	HTN_meta_BF05	chr14	25101629	cis	0.776	0.508	NA	NA	NA
rs10911944	2448382	PTGS2	DBP_meta_BF05	chr1	186850920	cis	0.777	0.357	NA	NA	NA
rs10911945	2448382	PTGS2	DBP_meta_BF05	chr1	186852597	cis	0.913	0.243	NA	NA	NA
rs10911953	2448382	PTGS2	DBP_meta_BF05	chr1	186868884	cis	0.822	0.545	NA	NA	NA
rs10915935	3841076	MYADM	SBP_meta_BF05/DBP_meta_BF05/HTN_meta_BF05	chr1	226292385	trans	0.638	0.277	NA	NA	NA
rs10922976	2435383	S100A10	DBP_meta_BF05	chr1	88476172	trans	0.223	0.382	NA	NA	NA
rs10922989	2435383	S100A10	DBP_meta_BF05	chr1	88484600	trans	0.144	0.33	NA	NA	NA
rs10922990	2435383	S100A10	DBP_meta_BF05	chr1	88484721	trans	0.192	0.343	NA	NA	NA
rs10923351	3550077	GLRX5	SBP_meta_BF05	chr1	118141764	trans	0.437	0.451	NA	NA	NA
rs10923354	3550077	GLRX5	SBP_meta_BF05	chr1	118152241	trans	0.394	0.526	NA	NA	NA
rs10923357	3550077	GLRX5	SBP_meta_BF05	chr1	118164771	trans	0.597	0.275	NA	NA	NA
rs10923358	3550077	GLRX5	SBP_meta_BF05	chr1	118164794	trans	0.596	0.288	NA	NA	NA
rs10926240	3185498	SLC31A2	SBP_meta_BF05/DBP_meta_BF05/HTN_meta_BF05	chr1	240559938	trans	0.462	0.971	NA	NA	NA
rs10928169	2508611	ARHGAP15	DBP_meta_BF05	chr2	144053578	cis	0.613	0.714	NA	NA	NA
rs10928195	2508611	ARHGAP15	DBP_meta_BF05	chr2	144428608	cis	0.331	0.131	NA	NA	NA
rs10930635	2761837	FGFBP2	SBP_meta_BF05	chr2	174946985	trans	0.0692	0.388	NA	NA	NA
rs10930636	2761837	FGFBP2	SBP_meta_BF05	chr2	174958727	trans	0.0881	0.423	NA	NA	NA
rs10931512	2520533	OBFC2A	DBP_meta_BF05	chr2	192515992	cis	0.223	0.154	NA	NA	NA
rs10939618	2761734	FBXL5	DBP_meta_BF05	chr4	15505556	cis	0.632	0.82	NA	NA	NA
rs10939621	2761734	FBXL5	DBP_meta_BF05	chr4	15578068	cis	0.101	0.00551	NA	NA	NA
rs10939643	2761837	FGFBP2	SBP_meta_BF05	chr4	15947088	cis	0.677	0.805	NA	NA	NA
rs10939644	2761837	FGFBP2	SBP_meta_BF05	chr4	15947493	cis	0.616	0.773	NA	NA	NA
rs10939648	2761837	FGFBP2	SBP_meta_BF05	chr4	16001378	cis	0.431	0.962	NA	NA	NA
rs10945565	2982076	TAGAP	HTN_meta_BF05/SBP_meta_BF05	chr6	159287663	cis	0.42	0.852	NA	NA	NA
rs1095653	2508611	ARHGAP15	DBP_meta_BF05	chr2	143824661	cis	0.48	0.375	NA	NA	NA
rs1095654	2508611	ARHGAP15	DBP_meta_BF05	chr2	143825002	cis	0.48	0.375	NA	NA	NA
rs10963811	3236958	VIM	DBP_meta_BF05	chr9	18858366	trans	0.178	0.238	NA	NA	NA
rs10963812	3236958	VIM	DBP_meta_BF05	chr9	18860744	trans	0.173	0.243	NA	NA	NA
rs10981621	3185498	SLC31A2	SBP_meta_BF05/DBP_meta_BF05/HTN_meta_BF05	chr9	115815398	cis	0.215	0.125	NA	NA	NA
rs10981637	3185498	SLC31A2	SBP_meta_BF05/DBP_meta_BF05/HTN_meta_BF05	chr9	115892245	cis	0.443	0.398	NA	NA	NA
rs10981648	3185498	SLC31A2	SBP_meta_BF05/DBP_meta_BF05/HTN_meta_BF05	chr9	115908452	cis	0.325	0.737	NA	NA	NA
rs10981650	3185498	SLC31A2	SBP_meta_BF05/DBP_meta_BF05/HTN_meta_BF05	chr9	115910991	cis	0.405	0.759	NA	NA	NA
rs10981655	3185498	SLC31A2	SBP_meta_BF05/DBP_meta_BF05/HTN_meta_BF05	chr9	115920610	cis	0.354	0.784	NA	NA	NA
rs10981656	3185498	SLC31A2	SBP_meta_BF05/DBP_meta_BF05/HTN_meta_BF05	chr9	115920643	cis	0.355	0.782	NA	NA	NA
rs10981663	3185498	SLC31A2	SBP_meta_BF05/DBP_meta_BF05/HTN_meta_BF05	chr9	115930186	cis	0.967	0.415	NA	NA	NA
rs10981669	3185498	SLC31A2	SBP_meta_BF05/DBP_meta_BF05/HTN_meta_BF05	chr9	115938318	cis	0.419	0.0799	NA	NA	NA
rs10981670	3185498	SLC31A2	SBP_meta_BF05/DBP_meta_BF05/HTN_meta_BF05	chr9	115939435	cis	0.426	0.123	NA	NA	NA
rs10981671	3185498	SLC31A2	SBP_meta_BF05/DBP_meta_BF05/HTN_meta_BF05	chr9	115942402	cis	0.172	0.0381	NA	NA	NA
rs10981672	3185498	SLC31A2	SBP_meta_BF05/DBP_meta_BF05/HTN_meta_BF05	chr9	115943336	cis	0.702	0.231	NA	NA	NA
rs10981673	3185498	SLC31A2	SBP_meta_BF05/DBP_meta_BF05/HTN_meta_BF05	chr9	115944671	cis	0.551	0.855	NA	NA	NA
rs10981674	3185498	SLC31A2	SBP_meta_BF05/DBP_meta_BF05/HTN_meta_BF05	chr9	115946170	cis	0.67	0.425	NA	NA	NA
rs10981682	3185498	SLC31A2	SBP_meta_BF05/DBP_meta_BF05/HTN_meta_BF05	chr9	115959981	cis	0.6	0.212	NA	NA	NA
rs10981683	3185498	SLC31A2	SBP_meta_BF05/DBP_meta_BF05/HTN_meta_BF05	chr9	115960547	cis	0.495	0.613	NA	NA	NA
rs10981686	3185498	SLC31A2	SBP_meta_BF05/DBP_meta_BF05/HTN_meta_BF05	chr9	115969983	cis	0.401	0.688	NA	NA	NA
rs10981693	3185498	SLC31A2	SBP_meta_BF05/DBP_meta_BF05/HTN_meta_BF05	chr9	115985417	cis	0.277	0.176	NA	NA	NA
rs10981694	3185498	SLC31A2	SBP_meta_BF05/DBP_meta_BF05/HTN_meta_BF05	chr9	115986409	cis	0.814	0.699	NA	NA	NA
rs10981695	3185498	SLC31A2	SBP_meta_BF05/DBP_meta_BF05/HTN_meta_BF05	chr9	115987782	cis	0.747	0.937	NA	NA	NA
rs10981696	3185498	SLC31A2	SBP_meta_BF05/DBP_meta_BF05/HTN_meta_BF05	chr9	115991417	cis	0.849	0.498	NA	NA	NA
rs10981698	3185498	SLC31A2	SBP_meta_BF05/DBP_meta_BF05/HTN_meta_BF05	chr9	115995780	cis	0.243	0.152	NA	NA	NA
rs10981699	3185498	SLC31A2	SBP_meta_BF05/DBP_meta_BF05/HTN_meta_BF05	chr9	115995901	cis	0.763	0.756	NA	NA	NA
rs10981704	3185498	SLC31A2	SBP_meta_BF05/DBP_meta_BF05/HTN_meta_BF05	chr9	116016269	cis	0.498	0.804	NA	NA	NA
rs10981711	3185498	SLC31A2	SBP_meta_BF05/DBP_meta_BF05/HTN_meta_BF05	chr9	116028004	cis	0.947	0.316	NA	NA	NA
rs10981715	3185498	SLC31A2	SBP_meta_BF05/DBP_meta_BF05/HTN_meta_BF05	chr9	116049498	cis	0.274	0.273	NA	NA	NA
rs10981723	3185498	SLC31A2	SBP_meta_BF05/DBP_meta_BF05/HTN_meta_BF05	chr9	116059567	cis	0.206	0.0459	NA	NA	NA
rs10981733	3185498	SLC31A2	SBP_meta_BF05/DBP_meta_BF05/HTN_meta_BF05	chr9	116087743	cis	0.81	0.513	NA	NA	NA
rs10981745	3185498	SLC31A2	SBP_meta_BF05/DBP_meta_BF05/HTN_meta_BF05	chr9	116104526	cis	0.777	0.481	NA	NA	NA
rs10981746	3185498	SLC31A2	SBP_meta_BF05/DBP_meta_BF05/HTN_meta_BF05	chr9	116105022	cis	0.85	0.498	NA	NA	NA
rs10981747	3185498	SLC31A2	SBP_meta_BF05/DBP_meta_BF05/HTN_meta_BF05	chr9	116105113	cis	0.859	0.508	NA	NA	NA
rs10981748	3185498	SLC31A2	SBP_meta_BF05/DBP_meta_BF05/HTN_meta_BF05	chr9	116105198	cis	0.875	0.529	NA	NA	NA
rs10981762	3185498	SLC31A2	SBP_meta_BF05/DBP_meta_BF05/HTN_meta_BF05	chr9	116116483	cis	0.931	0.612	NA	NA	NA
rs10981769	3185498	SLC31A2	SBP_meta_BF05/DBP_meta_BF05/HTN_meta_BF05	chr9	116125789	cis	0.456	0.308	NA	NA	NA
rs10981771	3185498	SLC31A2	SBP_meta_BF05/DBP_meta_BF05/HTN_meta_BF05	chr9	116125811	cis	0.462	0.31	NA	NA	NA
rs10999318	3293435	PRF1	SBP_meta_BF05/DBP_meta_BF05	chr10	72158841	cis	0.205	0.122	NA	NA	NA
rs10999459	3293435	PRF1	SBP_meta_BF05/DBP_meta_BF05	chr10	72422431	cis	0.885	0.67	NA	NA	NA
rs1106087	2611779	TMEM43	SBP_meta_BF05	chr3	14207708	cis	0.936	0.687	NA	NA	NA
rs11065987	3841076	MYADM	SBP_meta_BF05/DBP_meta_BF05/HTN_meta_BF05	chr12	112072424	trans	2.12e-08	3.43e-12	LDL cholesterol	BRAP	2e-09
rs11065987	3841076	MYADM	SBP_meta_BF05/DBP_meta_BF05/HTN_meta_BF05	chr12	112072424	trans	2.12e-08	3.43e-12	Hematocrit	ATXN2	1e-12
rs11065987	3841076	MYADM	SBP_meta_BF05/DBP_meta_BF05/HTN_meta_BF05	chr12	112072424	trans	2.12e-08	3.43e-12	Hematocrit	SH2B3	1e-12
rs11065987	2982076	TAGAP	HTN_meta_BF05/SBP_meta_BF05	chr12	112072424	trans	2.12e-08	3.43e-12	Hematocrit	SH2B3	1e-12
rs11065987	2982076	TAGAP	HTN_meta_BF05/SBP_meta_BF05	chr12	112072424	trans	2.12e-08	3.43e-12	Cholesterol, total	BRAP	7e-12
rs11065987	2982076	TAGAP	HTN_meta_BF05/SBP_meta_BF05	chr12	112072424	trans	2.12e-08	3.43e-12	Hemoglobin	TRAFD1	1e-11
rs11065987	2435383	S100A10	DBP_meta_BF05	chr12	112072424	trans	2.12e-08	3.43e-12	Hematocrit	ATXN2	1e-12
rs11065987	3841076	MYADM	SBP_meta_BF05/DBP_meta_BF05/HTN_meta_BF05	chr12	112072424	trans	2.12e-08	3.43e-12	Cholesterol, total	BRAP	7e-12
rs11065987	2435383	S100A10	DBP_meta_BF05	chr12	112072424	trans	2.12e-08	3.43e-12	LDL cholesterol	BRAP	2e-09
rs11065987	2435383	S100A10	DBP_meta_BF05	chr12	112072424	trans	2.12e-08	3.43e-12	Cholesterol, total	BRAP	7e-12
rs11065987	2435383	S100A10	DBP_meta_BF05	chr12	112072424	trans	2.12e-08	3.43e-12	Hemoglobin	TRAFD1	1e-11
rs11065987	3838004	PPP1R15A	SBP_meta_BF05	chr12	112072424	trans	2.12e-08	3.43e-12	Hematocrit	ATXN2	1e-12
rs11065987	3838004	PPP1R15A	SBP_meta_BF05	chr12	112072424	trans	2.12e-08	3.43e-12	Hematocrit	SH2B3	1e-12
rs11065987	3841076	MYADM	SBP_meta_BF05/DBP_meta_BF05/HTN_meta_BF05	chr12	112072424	trans	2.12e-08	3.43e-12	Hemoglobin	TRAFD1	1e-11
rs11065987	3838004	PPP1R15A	SBP_meta_BF05	chr12	112072424	trans	2.12e-08	3.43e-12	Cholesterol, total	BRAP	7e-12
rs11065987	3838004	PPP1R15A	SBP_meta_BF05	chr12	112072424	trans	2.12e-08	3.43e-12	Hemoglobin	TRAFD1	1e-11
rs11065987	2982076	TAGAP	HTN_meta_BF05/SBP_meta_BF05	chr12	112072424	trans	2.12e-08	3.43e-12	LDL cholesterol	BRAP	2e-09
rs11065987	2761837	FGFBP2	SBP_meta_BF05	chr12	112072424	trans	2.12e-08	3.43e-12	Hematocrit	SH2B3	1e-12
rs11065987	2761837	FGFBP2	SBP_meta_BF05	chr12	112072424	trans	2.12e-08	3.43e-12	LDL cholesterol	BRAP	2e-09
rs11065987	2761837	FGFBP2	SBP_meta_BF05	chr12	112072424	trans	2.12e-08	3.43e-12	Cholesterol, total	BRAP	7e-12
rs11065987	2435383	S100A10	DBP_meta_BF05	chr12	112072424	trans	2.12e-08	3.43e-12	Hematocrit	SH2B3	1e-12
rs11065987	3544525	FOS	SBP_meta_BF05	chr12	112072424	trans	2.12e-08	3.43e-12	Hematocrit	ATXN2	1e-12
rs11065987	3544525	FOS	SBP_meta_BF05	chr12	112072424	trans	2.12e-08	3.43e-12	Hematocrit	SH2B3	1e-12
rs11065987	3544525	FOS	SBP_meta_BF05	chr12	112072424	trans	2.12e-08	3.43e-12	LDL cholesterol	BRAP	2e-09
rs11065987	3544525	FOS	SBP_meta_BF05	chr12	112072424	trans	2.12e-08	3.43e-12	Cholesterol, total	BRAP	7e-12
rs11065987	3544525	FOS	SBP_meta_BF05	chr12	112072424	trans	2.12e-08	3.43e-12	Hemoglobin	TRAFD1	1e-11
rs11065987	3838004	PPP1R15A	SBP_meta_BF05	chr12	112072424	trans	2.12e-08	3.43e-12	LDL cholesterol	BRAP	2e-09
rs11065987	3662808	GPR56	SBP_meta_BF05/DBP_meta_BF05	chr12	112072424	trans	2.12e-08	3.43e-12	LDL cholesterol	BRAP	2e-09
rs11065987	3662808	GPR56	SBP_meta_BF05/DBP_meta_BF05	chr12	112072424	trans	2.12e-08	3.43e-12	Hematocrit	SH2B3	1e-12
rs11065987	2761837	FGFBP2	SBP_meta_BF05	chr12	112072424	trans	2.12e-08	3.43e-12	Hemoglobin	TRAFD1	1e-11
rs11065987	2761837	FGFBP2	SBP_meta_BF05	chr12	112072424	trans	2.12e-08	3.43e-12	Hematocrit	ATXN2	1e-12
rs11065987	3662808	GPR56	SBP_meta_BF05/DBP_meta_BF05	chr12	112072424	trans	2.12e-08	3.43e-12	Hematocrit	ATXN2	1e-12
rs11065987	2982076	TAGAP	HTN_meta_BF05/SBP_meta_BF05	chr12	112072424	trans	2.12e-08	3.43e-12	Hematocrit	ATXN2	1e-12
rs11065987	3662808	GPR56	SBP_meta_BF05/DBP_meta_BF05	chr12	112072424	trans	2.12e-08	3.43e-12	Hemoglobin	TRAFD1	1e-11
rs11065987	3662808	GPR56	SBP_meta_BF05/DBP_meta_BF05	chr12	112072424	trans	2.12e-08	3.43e-12	Cholesterol, total	BRAP	7e-12
rs11066188	2982076	TAGAP	HTN_meta_BF05/SBP_meta_BF05	chr12	112610714	trans	1.72e-08	3.06e-12	NA	NA	NA
rs11066188	3841076	MYADM	SBP_meta_BF05/DBP_meta_BF05/HTN_meta_BF05	chr12	112610714	trans	1.72e-08	3.06e-12	NA	NA	NA
rs11066301	2435383	S100A10	DBP_meta_BF05	chr12	112871372	trans	4.94e-08	6.59e-11	Hematological parameters	PTPN11	8e-12
rs11066301	3544525	FOS	SBP_meta_BF05	chr12	112871372	trans	4.94e-08	6.59e-11	Hematological parameters	PTPN11	8e-12
rs11066301	3841076	MYADM	SBP_meta_BF05/DBP_meta_BF05/HTN_meta_BF05	chr12	112871372	trans	4.94e-08	6.59e-11	Hematological parameters	PTPN11	8e-12
rs11066301	3838004	PPP1R15A	SBP_meta_BF05	chr12	112871372	trans	4.94e-08	6.59e-11	Hematological parameters	PTPN11	8e-12
rs11066301	2761837	FGFBP2	SBP_meta_BF05	chr12	112871372	trans	4.94e-08	6.59e-11	Hematological parameters	PTPN11	8e-12
rs11066320	3841076	MYADM	SBP_meta_BF05/DBP_meta_BF05/HTN_meta_BF05	chr12	112906415	trans	4.56e-08	6.32e-11	NA	NA	NA
rs11071174	3594825	PIGB	SBP_meta_BF05	chr15	55559289	cis	0.423	0.38	NA	NA	NA
rs11071175	3594825	PIGB	SBP_meta_BF05	chr15	55560425	cis	0.347	0.327	NA	NA	NA
rs11071176	3594825	PIGB	SBP_meta_BF05	chr15	55560763	cis	0.424	0.379	NA	NA	NA
rs11071180	3594825	PIGB	SBP_meta_BF05	chr15	55622299	cis	0.139	0.0721	NA	NA	NA
rs11071181	3594825	PIGB	SBP_meta_BF05	chr15	55622526	cis	0.203	0.332	NA	NA	NA
rs11072171	3293435	PRF1	SBP_meta_BF05/DBP_meta_BF05	chr15	70712422	trans	0.734	0.721	NA	NA	NA
rs11072171	3959986	IL2RB	DBP_meta_BF05	chr15	70712422	trans	0.734	0.721	NA	NA	NA
rs1108341	2611779	TMEM43	SBP_meta_BF05	chr3	13937328	cis	0.539	0.336	NA	NA	NA
rs11084071	3868998	NKG7	SBP_meta_BF05	chr19	51867107	cis	0.199	0.182	NA	NA	NA
rs11084794	3830002	GRAMD1A	SBP_meta_BF05/DBP_meta_BF05	chr19	35470408	cis	0.621	0.582	NA	NA	NA
rs11084796	3830002	GRAMD1A	SBP_meta_BF05/DBP_meta_BF05	chr19	35500640	cis	0.553	0.819	NA	NA	NA
rs1109707	2491745	GNLY	SBP_meta_BF05	chr2	85947051	cis	0.518	0.843	NA	NA	NA
rs1109708	2491745	GNLY	SBP_meta_BF05	chr2	85947285	cis	0.644	0.934	NA	NA	NA
rs11098901	2774971	ANTXR2	DBP_meta_BF05	chr4	80733423	cis	0.256	0.112	NA	NA	NA
rs11098925	2774971	ANTXR2	DBP_meta_BF05	chr4	80797596	cis	0.527	0.0881	NA	NA	NA
rs11098964	2774971	ANTXR2	DBP_meta_BF05	chr4	80887969	cis	0.251	0.259	NA	NA	NA
rs11098965	2774971	ANTXR2	DBP_meta_BF05	chr4	80888040	cis	0.0923	0.0886	NA	NA	NA
rs11098983	2774971	ANTXR2	DBP_meta_BF05	chr4	80919399	cis	0.26	0.286	NA	NA	NA
rs1110258	2761734	FBXL5	DBP_meta_BF05	chr4	15742716	cis	0.857	0.671	NA	NA	NA
rs1110261	2608725	BHLHE40	SBP_meta_BF05/DBP_meta_BF05	chr3	5019936	cis	0.948	0.499	NA	NA	NA
rs11112235	2435383	S100A10	DBP_meta_BF05	chr12	105307461	trans	0.752	0.273	NA	NA	NA
rs1111527	2491745	GNLY	SBP_meta_BF05	chr2	85977658	cis	0.109	0.151	NA	NA	NA
rs1112488	2774971	ANTXR2	DBP_meta_BF05	chr4	80699200	cis	0.719	0.812	NA	NA	NA
rs11126992	2491745	GNLY	SBP_meta_BF05	chr2	85676726	cis	0.819	0.904	NA	NA	NA
rs11126996	2491745	GNLY	SBP_meta_BF05	chr2	85932948	cis	0.822	0.997	NA	NA	NA
rs11126997	2491745	GNLY	SBP_meta_BF05	chr2	85949396	cis	0.421	0.609	NA	NA	NA
rs11126998	2491745	GNLY	SBP_meta_BF05	chr2	85978786	cis	0.149	0.175	NA	NA	NA
rs11127	2491745	GNLY	SBP_meta_BF05	chr2	85924729	cis	0.408	0.0844	NA	NA	NA
rs11128668	2611779	TMEM43	SBP_meta_BF05	chr3	13976830	cis	0.758	0.628	NA	NA	NA
rs11128669	2611779	TMEM43	SBP_meta_BF05	chr3	13983299	cis	0.765	0.639	NA	NA	NA
rs11128679	2611779	TMEM43	SBP_meta_BF05	chr3	14075245	cis	0.421	0.44	NA	NA	NA
rs11128686	2611779	TMEM43	SBP_meta_BF05	chr3	14251647	cis	0.7	0.955	NA	NA	NA
rs11130195	2608725	BHLHE40	SBP_meta_BF05/DBP_meta_BF05	chr3	5000010	cis	0.924	0.573	NA	NA	NA
rs11130215	2608725	BHLHE40	SBP_meta_BF05/DBP_meta_BF05	chr3	5026008	cis	NA	NA	NA	NA	NA
rs11130232	2608725	BHLHE40	SBP_meta_BF05/DBP_meta_BF05	chr3	5054180	cis	0.413	0.754	NA	NA	NA
rs11130236	2608725	BHLHE40	SBP_meta_BF05/DBP_meta_BF05	chr3	5055963	cis	0.442	0.8	NA	NA	NA
rs11134486	2608725	BHLHE40	SBP_meta_BF05/DBP_meta_BF05	chr5	167483665	trans	0.0217	0.0108	NA	NA	NA
rs11134758	2887309	DUSP1	SBP_meta_BF05	chr5	172226075	cis	0.655	0.447	NA	NA	NA
rs1113937	3174816	ANXA1	DBP_meta_BF05	chr9	76036355	cis	0.999	0.319	NA	NA	NA
rs11143434	3174816	ANXA1	DBP_meta_BF05	chr9	75632133	cis	0.879	0.476	NA	NA	NA
rs11143435	3174816	ANXA1	DBP_meta_BF05	chr9	75634844	cis	0.886	0.484	NA	NA	NA
rs11143438	3174816	ANXA1	DBP_meta_BF05	chr9	75649046	cis	0.734	0.828	NA	NA	NA
rs11143439	3174816	ANXA1	DBP_meta_BF05	chr9	75650908	cis	0.792	0.386	NA	NA	NA
rs11143450	3174816	ANXA1	DBP_meta_BF05	chr9	75669943	cis	0.886	0.358	NA	NA	NA
rs11143462	3174816	ANXA1	DBP_meta_BF05	chr9	75694626	cis	0.699	0.362	NA	NA	NA
rs11143468	3174816	ANXA1	DBP_meta_BF05	chr9	75706669	cis	0.694	0.373	NA	NA	NA
rs11143474	3174816	ANXA1	DBP_meta_BF05	chr9	75720007	cis	0.113	0.154	NA	NA	NA
rs11143475	3174816	ANXA1	DBP_meta_BF05	chr9	75720310	cis	0.114	0.158	NA	NA	NA
rs11143478	3174816	ANXA1	DBP_meta_BF05	chr9	75721166	cis	0.11	0.153	NA	NA	NA
rs11143479	3174816	ANXA1	DBP_meta_BF05	chr9	75721950	cis	0.104	0.153	NA	NA	NA
rs11143481	3174816	ANXA1	DBP_meta_BF05	chr9	75735898	cis	0.133	0.175	NA	NA	NA
rs11143501	3174816	ANXA1	DBP_meta_BF05	chr9	75760594	cis	0.716	0.924	NA	NA	NA
rs11143512	3174816	ANXA1	DBP_meta_BF05	chr9	75788020	cis	0.827	0.889	NA	NA	NA
rs11143513	3174816	ANXA1	DBP_meta_BF05	chr9	75789082	cis	0.492	0.566	NA	NA	NA
rs11143514	3174816	ANXA1	DBP_meta_BF05	chr9	75789579	cis	0.507	0.58	NA	NA	NA
rs11143515	3174816	ANXA1	DBP_meta_BF05	chr9	75790576	cis	0.599	0.319	NA	NA	NA
rs11143520	3174816	ANXA1	DBP_meta_BF05	chr9	75792846	cis	0.74	0.322	NA	NA	NA
rs11143521	3174816	ANXA1	DBP_meta_BF05	chr9	75794996	cis	0.728	0.355	NA	NA	NA
rs11143534	3174816	ANXA1	DBP_meta_BF05	chr9	75814659	cis	0.639	0.71	NA	NA	NA
rs11143541	3174816	ANXA1	DBP_meta_BF05	chr9	75837087	cis	0.928	0.401	NA	NA	NA
rs11143546	3174816	ANXA1	DBP_meta_BF05	chr9	75854961	cis	0.757	0.238	NA	NA	NA
rs11143547	3174816	ANXA1	DBP_meta_BF05	chr9	75859487	cis	0.699	0.585	NA	NA	NA
rs11143551	3174816	ANXA1	DBP_meta_BF05	chr9	75882610	cis	0.838	0.571	NA	NA	NA
rs11143554	3174816	ANXA1	DBP_meta_BF05	chr9	75901656	cis	0.692	0.572	NA	NA	NA
rs11143555	3174816	ANXA1	DBP_meta_BF05	chr9	75910310	cis	0.818	0.253	NA	NA	NA
rs11143563	3174816	ANXA1	DBP_meta_BF05	chr9	75932470	cis	0.901	0.957	NA	NA	NA
rs11143574	3174816	ANXA1	DBP_meta_BF05	chr9	75979673	cis	0.288	0.183	NA	NA	NA
rs11143575	3174816	ANXA1	DBP_meta_BF05	chr9	75983171	cis	0.928	0.262	NA	NA	NA
rs11143576	3174816	ANXA1	DBP_meta_BF05	chr9	75983236	cis	0.942	0.279	NA	NA	NA
rs11143579	3174816	ANXA1	DBP_meta_BF05	chr9	75989531	cis	0.948	0.28	NA	NA	NA
rs11143580	3174816	ANXA1	DBP_meta_BF05	chr9	75991382	cis	0.963	0.283	NA	NA	NA
rs11143586	3174816	ANXA1	DBP_meta_BF05	chr9	76013962	cis	0.986	0.299	NA	NA	NA
rs11143588	3174816	ANXA1	DBP_meta_BF05	chr9	76032616	cis	0.998	0.319	NA	NA	NA
rs11143595	3174816	ANXA1	DBP_meta_BF05	chr9	76056921	cis	0.946	0.335	NA	NA	NA
rs11143598	3174816	ANXA1	DBP_meta_BF05	chr9	76092095	cis	0.719	0.267	NA	NA	NA
rs11143599	3174816	ANXA1	DBP_meta_BF05	chr9	76101777	cis	0.843	0.369	NA	NA	NA
rs11143623	3174816	ANXA1	DBP_meta_BF05	chr9	76183000	cis	0.841	0.475	NA	NA	NA
rs11143624	3174816	ANXA1	DBP_meta_BF05	chr9	76194965	cis	0.811	0.559	NA	NA	NA
rs11143625	3174816	ANXA1	DBP_meta_BF05	chr9	76195772	cis	0.807	0.552	NA	NA	NA
rs11143626	3174816	ANXA1	DBP_meta_BF05	chr9	76202111	cis	0.755	0.708	NA	NA	NA
rs11158727	3558375	GZMB	HTN_meta_BF05	chr14	24944766	cis	0.447	0.622	NA	NA	NA
rs11158778	3558375	GZMB	HTN_meta_BF05	chr14	25012972	cis	0.798	0.848	NA	NA	NA
rs11158887	3558375	GZMB	HTN_meta_BF05	chr14	25214305	cis	0.409	0.635	NA	NA	NA
rs11158890	3558375	GZMB	HTN_meta_BF05	chr14	25216509	cis	0.404	0.94	NA	NA	NA
rs11158905	3558375	GZMB	HTN_meta_BF05	chr14	25249822	cis	0.481	0.967	NA	NA	NA
rs1115979	3174816	ANXA1	DBP_meta_BF05	chr18	23971776	trans	0.234	0.257	NA	NA	NA
rs11160254	3550077	GLRX5	SBP_meta_BF05	chr14	95993595	cis	0.18	0.225	NA	NA	NA
rs11160255	3550077	GLRX5	SBP_meta_BF05	chr14	96003069	cis	0.966	0.253	NA	NA	NA
rs11160258	3550077	GLRX5	SBP_meta_BF05	chr14	96016792	cis	0.226	0.423	NA	NA	NA
rs11160260	3550077	GLRX5	SBP_meta_BF05	chr14	96020139	cis	0.108	0.0314	NA	NA	NA
rs11160261	3550077	GLRX5	SBP_meta_BF05	chr14	96021680	cis	0.0975	0.0269	NA	NA	NA
rs11160267	3550077	GLRX5	SBP_meta_BF05	chr14	96059946	cis	0.551	0.21	NA	NA	NA
rs11160270	3550077	GLRX5	SBP_meta_BF05	chr14	96078645	cis	0.728	0.386	NA	NA	NA
rs11160271	3550077	GLRX5	SBP_meta_BF05	chr14	96078810	cis	0.732	0.387	NA	NA	NA
rs11160273	3550077	GLRX5	SBP_meta_BF05	chr14	96079328	cis	0.739	0.394	NA	NA	NA
rs11168066	2448382	PTGS2	DBP_meta_BF05	chr5	148201255	trans	0.861	0.863	NA	NA	NA
rs11189496	2448382	PTGS2	DBP_meta_BF05	chr10	83117716	trans	0.981	0.958	NA	NA	NA
rs11204668	2434438	MCL1	SBP_meta_BF05	chr1	150543686	cis	0.253	0.784	NA	NA	NA
rs11204675	2434438	MCL1	SBP_meta_BF05	chr1	150570985	cis	0.108	0.612	NA	NA	NA
rs11204680	2434438	MCL1	SBP_meta_BF05	chr1	150587140	cis	0.158	0.67	NA	NA	NA
rs11204682	2434438	MCL1	SBP_meta_BF05	chr1	150595537	cis	0.0692	0.0806	NA	NA	NA
rs11204684	2434438	MCL1	SBP_meta_BF05	chr1	150608894	cis	0.137	0.65	NA	NA	NA
rs11204693	2434438	MCL1	SBP_meta_BF05	chr1	150647987	cis	0.333	0.992	NA	NA	NA
rs11204725	2434438	MCL1	SBP_meta_BF05	chr1	150742700	cis	0.705	0.647	NA	NA	NA
rs11204904	3185498	SLC31A2	SBP_meta_BF05/DBP_meta_BF05/HTN_meta_BF05	chr1	151835275	trans	0.648	0.484	NA	NA	NA
rs11204909	2435383	S100A10	DBP_meta_BF05	NA	NA	cis	0.86	0.708	NA	NA	NA
rs11204911	2435383	S100A10	DBP_meta_BF05	chr1	151874420	cis	0.896	0.646	NA	NA	NA
rs11204912	2435383	S100A10	DBP_meta_BF05	chr1	151877655	cis	0.902	0.622	NA	NA	NA
rs11204923	2435383	S100A10	DBP_meta_BF05	chr1	151977891	cis	0.856	0.418	NA	NA	NA
rs11231017	3375735	AHNAK	SBP_meta_BF05	chr11	62061349	cis	0.00472	0.038	NA	NA	NA
rs11231018	3375735	AHNAK	SBP_meta_BF05	chr11	62062509	cis	0.00498	0.0379	NA	NA	NA
rs11231020	3375735	AHNAK	SBP_meta_BF05	chr11	62068339	cis	0.000352	0.00238	NA	NA	NA
rs11231027	3375735	AHNAK	SBP_meta_BF05	chr11	62080042	cis	0.000456	0.00259	NA	NA	NA
rs11231042	3375735	AHNAK	SBP_meta_BF05	chr11	62120559	cis	0.000454	0.00167	NA	NA	NA
rs11231053	3375735	AHNAK	SBP_meta_BF05	chr11	62133220	cis	0.721	0.0879	NA	NA	NA
rs11231073	3375735	AHNAK	SBP_meta_BF05	chr11	62161324	cis	0.0317	0.00786	NA	NA	NA
rs11231085	3375735	AHNAK	SBP_meta_BF05	chr11	62190448	cis	0.798	0.416	NA	NA	NA
rs11231087	3375735	AHNAK	SBP_meta_BF05	chr11	62198701	cis	0.775	0.334	NA	NA	NA
rs11231138	3375735	AHNAK	SBP_meta_BF05	chr11	62316195	cis	0.171	0.206	NA	NA	NA
rs11231141	3375735	AHNAK	SBP_meta_BF05	chr11	62326265	cis	0.171	0.207	NA	NA	NA
rs11231144	3375735	AHNAK	SBP_meta_BF05	chr11	62328038	cis	0.209	0.266	NA	NA	NA
rs11231150	3375735	AHNAK	SBP_meta_BF05	chr11	62351802	cis	0.183	0.222	NA	NA	NA
rs11231154	3375735	AHNAK	SBP_meta_BF05	chr11	62362293	cis	0.189	0.229	NA	NA	NA
rs11231159	3375735	AHNAK	SBP_meta_BF05	chr11	62370527	cis	0.169	0.016	NA	NA	NA
rs11231161	3375735	AHNAK	SBP_meta_BF05	chr11	62378221	cis	0.27	0.304	NA	NA	NA
rs11234100	2491745	GNLY	SBP_meta_BF05	chr11	84340480	trans	0.14	0.584	NA	NA	NA
rs1125378	2761734	FBXL5	DBP_meta_BF05	chr4	15540490	cis	0.0234	0.123	NA	NA	NA
rs1125379	2761734	FBXL5	DBP_meta_BF05	chr4	15540538	cis	0.482	0.558	NA	NA	NA
rs11254284	3236958	VIM	DBP_meta_BF05	chr10	16978429	cis	0.222	0.725	NA	NA	NA
rs11254311	3236958	VIM	DBP_meta_BF05	chr10	17018062	cis	0.0269	0.106	NA	NA	NA
rs11254312	3236958	VIM	DBP_meta_BF05	chr10	17018268	cis	0.0267	0.109	NA	NA	NA
rs11254313	3236958	VIM	DBP_meta_BF05	chr10	17018280	cis	0.0274	0.111	NA	NA	NA
rs11254314	3236958	VIM	DBP_meta_BF05	chr10	17018318	cis	0.0209	0.0962	NA	NA	NA
rs11254315	3236958	VIM	DBP_meta_BF05	chr10	17018481	cis	0.0296	0.119	NA	NA	NA
rs11254320	3236958	VIM	DBP_meta_BF05	chr10	17027451	cis	0.208	0.506	NA	NA	NA
rs11254389	3236958	VIM	DBP_meta_BF05	chr10	17176825	cis	0.467	0.74	NA	NA	NA
rs11254393	3236958	VIM	DBP_meta_BF05	chr10	17182373	cis	0.448	0.772	NA	NA	NA
rs11254398	3236958	VIM	DBP_meta_BF05	chr10	17186625	cis	0.504	0.777	NA	NA	NA
rs11254399	3236958	VIM	DBP_meta_BF05	chr10	17187661	cis	0.465	0.751	NA	NA	NA
rs11254401	3236958	VIM	DBP_meta_BF05	chr10	17188818	cis	0.476	0.728	NA	NA	NA
rs11254405	3236958	VIM	DBP_meta_BF05	chr10	17190561	cis	0.483	0.713	NA	NA	NA
rs11254408	3236958	VIM	DBP_meta_BF05	chr10	17199778	cis	0.429	0.82	NA	NA	NA
rs11254412	3236958	VIM	DBP_meta_BF05	chr10	17202226	cis	0.425	0.821	NA	NA	NA
rs11254420	3236958	VIM	DBP_meta_BF05	chr10	17209342	cis	0.464	0.798	NA	NA	NA
rs11254427	3236958	VIM	DBP_meta_BF05	chr10	17219849	cis	0.46	0.835	NA	NA	NA
rs11254428	3236958	VIM	DBP_meta_BF05	chr10	17220450	cis	0.459	0.837	NA	NA	NA
rs11254432	3236958	VIM	DBP_meta_BF05	chr10	17223154	cis	0.46	0.84	NA	NA	NA
rs11254433	3236958	VIM	DBP_meta_BF05	chr10	17223276	cis	0.438	0.852	NA	NA	NA
rs11254434	3236958	VIM	DBP_meta_BF05	chr10	17223313	cis	0.448	0.842	NA	NA	NA
rs11254437	3236958	VIM	DBP_meta_BF05	chr10	17225120	cis	0.452	0.864	NA	NA	NA
rs11254439	3236958	VIM	DBP_meta_BF05	chr10	17226163	cis	0.458	0.875	NA	NA	NA
rs11254440	3236958	VIM	DBP_meta_BF05	chr10	17226357	cis	0.464	0.878	NA	NA	NA
rs11254441	3236958	VIM	DBP_meta_BF05	chr10	17226896	cis	0.471	0.867	NA	NA	NA
rs11254442	3236958	VIM	DBP_meta_BF05	chr10	17226999	cis	0.479	0.858	NA	NA	NA
rs11254443	3236958	VIM	DBP_meta_BF05	chr10	17227074	cis	0.478	0.866	NA	NA	NA
rs11254444	3236958	VIM	DBP_meta_BF05	chr10	17227217	cis	0.475	0.875	NA	NA	NA
rs11254451	3236958	VIM	DBP_meta_BF05	chr10	17233727	cis	0.603	0.83	NA	NA	NA
rs1126158	3862108	CLC	DBP_meta_BF05	chr19	40173502	cis	0.982	0.675	NA	NA	NA
rs11265297	2439842	TAGLN2	SBP_meta_BF05	chr1	159890459	cis	0.796	0.839	NA	NA	NA
rs11265313	2439842	TAGLN2	SBP_meta_BF05	chr1	160029456	cis	0.941	0.851	NA	NA	NA
rs1126547	2611779	TMEM43	SBP_meta_BF05	chr3	14186757	cis	0.381	0.0667	NA	NA	NA
rs1128150	3185498	SLC31A2	SBP_meta_BF05/DBP_meta_BF05/HTN_meta_BF05	chr9	115927857	cis	0.329	0.814	NA	NA	NA
rs1128774	3185498	SLC31A2	SBP_meta_BF05/DBP_meta_BF05/HTN_meta_BF05	chr9	115925396	cis	0.298	0.556	NA	NA	NA
rs1128786	3185498	SLC31A2	SBP_meta_BF05/DBP_meta_BF05/HTN_meta_BF05	chr9	115926263	cis	0.35	0.709	NA	NA	NA
rs1130866	2491745	GNLY	SBP_meta_BF05	chr2	85893741	cis	0.0968	0.0531	NA	NA	NA
rs1131671	3174816	ANXA1	DBP_meta_BF05	chr2	133402607	trans	0.429	0.29	NA	NA	NA
rs1133618	3185498	SLC31A2	SBP_meta_BF05/DBP_meta_BF05/HTN_meta_BF05	chr9	115968797	cis	0.6	0.197	NA	NA	NA
rs1133620	3185498	SLC31A2	SBP_meta_BF05/DBP_meta_BF05/HTN_meta_BF05	chr9	115968678	cis	0.571	0.201	NA	NA	NA
rs1134634	2761734	FBXL5	DBP_meta_BF05	chr4	15603069	cis	0.11	0.174	NA	NA	NA
rs1136774	2434438	MCL1	SBP_meta_BF05	chr1	150738197	cis	0.7	0.652	NA	NA	NA
rs11464707	3550077	GLRX5	SBP_meta_BF05	chr1	118161020	trans	0.666	0.249	NA	NA	NA
rs1154578	2761734	FBXL5	DBP_meta_BF05	chr4	15507032	cis	0.219	0.538	NA	NA	NA
rs11557908	2774971	ANTXR2	DBP_meta_BF05	chr4	80994033	cis	NA	NA	NA	NA	NA
rs11574927	2761734	FBXL5	DBP_meta_BF05	chr4	15840243	cis	0.364	0.326	NA	NA	NA
rs1157622	3293435	PRF1	SBP_meta_BF05/DBP_meta_BF05	chr15	70704534	trans	0.787	0.936	NA	NA	NA
rs11577386	3550077	GLRX5	SBP_meta_BF05	chr1	118171690	trans	0.617	0.253	NA	NA	NA
rs11578030	2435383	S100A10	DBP_meta_BF05	chr1	152142067	cis	0.924	0.841	NA	NA	NA
rs11580646	3550077	GLRX5	SBP_meta_BF05	chr1	118162419	trans	0.607	0.264	NA	NA	NA
rs11581122	3550077	GLRX5	SBP_meta_BF05	chr1	118168826	trans	0.622	0.253	NA	NA	NA
rs11582739	2435383	S100A10	DBP_meta_BF05	chr1	151934541	cis	0.593	0.811	NA	NA	NA
rs11587409	3550077	GLRX5	SBP_meta_BF05	chr1	118143444	trans	0.743	0.251	NA	NA	NA
rs11587539	2448382	PTGS2	DBP_meta_BF05	chr1	186915177	cis	0.847	0.845	NA	NA	NA
rs11602307	3375735	AHNAK	SBP_meta_BF05	chr11	62060546	cis	0.00451	0.0386	NA	NA	NA
rs11605459	3375735	AHNAK	SBP_meta_BF05	chr11	62088747	cis	0.00061	0.00314	NA	NA	NA
rs11620702	3558375	GZMB	HTN_meta_BF05	chr14	25128114	cis	0.538	0.198	NA	NA	NA
rs11621263	3558375	GZMB	HTN_meta_BF05	chr14	25095150	cis	0.955	0.915	NA	NA	NA
rs11621622	3550077	GLRX5	SBP_meta_BF05	chr14	96066715	cis	0.969	0.348	NA	NA	NA
rs11621865	3558375	GZMB	HTN_meta_BF05	chr14	25138412	cis	0.903	0.3	NA	NA	NA
rs11621926	3550077	GLRX5	SBP_meta_BF05	chr14	96054262	cis	0.46	0.285	NA	NA	NA
rs11622378	3558375	GZMB	HTN_meta_BF05	chr14	25234691	cis	0.415	0.961	NA	NA	NA
rs11622384	3558375	GZMB	HTN_meta_BF05	chr14	25234718	cis	0.41	0.959	NA	NA	NA
rs11623300	3558375	GZMB	HTN_meta_BF05	chr14	25210903	cis	0.452	0.867	NA	NA	NA
rs11623651	3558375	GZMB	HTN_meta_BF05	chr14	25132860	cis	0.488	0.583	NA	NA	NA
rs11624387	3558375	GZMB	HTN_meta_BF05	chr14	25050392	cis	0.767	0.85	NA	NA	NA
rs11624634	3558375	GZMB	HTN_meta_BF05	chr14	25133015	cis	0.752	0.625	NA	NA	NA
rs11624680	3550077	GLRX5	SBP_meta_BF05	chr14	96026450	cis	0.242	0.0342	NA	NA	NA
rs11624701	3550077	GLRX5	SBP_meta_BF05	chr14	96077694	cis	0.724	0.391	NA	NA	NA
rs11625270	3558375	GZMB	HTN_meta_BF05	chr14	25106510	cis	0.557	0.639	NA	NA	NA
rs11625664	3558375	GZMB	HTN_meta_BF05	chr14	24954166	cis	0.94	0.876	NA	NA	NA
rs11626395	3558375	GZMB	HTN_meta_BF05	chr14	25247377	cis	0.385	0.941	NA	NA	NA
rs11626519	3558375	GZMB	HTN_meta_BF05	chr14	25109986	cis	0.377	0.37	NA	NA	NA
rs11627080	3550077	GLRX5	SBP_meta_BF05	chr14	96019278	cis	0.241	0.287	NA	NA	NA
rs11627157	3550077	GLRX5	SBP_meta_BF05	chr14	96019537	cis	0.244	0.289	NA	NA	NA
rs11627296	3558375	GZMB	HTN_meta_BF05	chr14	25046971	cis	0.762	0.835	NA	NA	NA
rs11627439	3558375	GZMB	HTN_meta_BF05	chr14	24883239	cis	0.871	0.835	NA	NA	NA
rs11627643	3558375	GZMB	HTN_meta_BF05	chr14	25161203	cis	0.529	0.788	NA	NA	NA
rs11627992	3558375	GZMB	HTN_meta_BF05	chr14	24947693	cis	0.471	0.63	NA	NA	NA
rs11628509	3550077	GLRX5	SBP_meta_BF05	chr14	96073766	cis	0.749	0.467	NA	NA	NA
rs11628604	3550077	GLRX5	SBP_meta_BF05	chr14	96077288	cis	0.397	0.708	NA	NA	NA
rs11628694	3550077	GLRX5	SBP_meta_BF05	chr14	96077543	cis	0.723	0.393	NA	NA	NA
rs11628711	3550077	GLRX5	SBP_meta_BF05	chr14	96077477	cis	0.72	0.394	NA	NA	NA
rs11628728	3550077	GLRX5	SBP_meta_BF05	chr14	96077637	cis	0.722	0.39	NA	NA	NA
rs11629129	3558375	GZMB	HTN_meta_BF05	chr14	25094856	cis	0.966	0.823	NA	NA	NA
rs11629613	3594825	PIGB	SBP_meta_BF05	chr15	55577303	cis	0.675	0.493	NA	NA	NA
rs11634341	3959986	IL2RB	DBP_meta_BF05	chr15	70715356	trans	0.705	0.793	NA	NA	NA
rs11634341	3293435	PRF1	SBP_meta_BF05/DBP_meta_BF05	chr15	70715356	trans	0.705	0.793	NA	NA	NA
rs11634522	3293435	PRF1	SBP_meta_BF05/DBP_meta_BF05	chr15	70704824	trans	0.83	0.963	NA	NA	NA
rs11634522	3959986	IL2RB	DBP_meta_BF05	chr15	70704824	trans	0.83	0.963	NA	NA	NA
rs11635795	3959986	IL2RB	DBP_meta_BF05	chr15	70716362	trans	0.724	0.799	NA	NA	NA
rs11635795	3293435	PRF1	SBP_meta_BF05/DBP_meta_BF05	chr15	70716362	trans	0.724	0.799	NA	NA	NA
rs11636687	3594825	PIGB	SBP_meta_BF05	chr15	55605152	cis	0.138	0.0535	NA	NA	NA
rs11637235	3822657	CD97	SBP_meta_BF05/DBP_meta_BF05	chr15	48633153	trans	0.397	0.921	NA	NA	NA
rs11639418	3594825	PIGB	SBP_meta_BF05	chr15	55555694	cis	0.439	0.432	NA	NA	NA
rs11639469	3594825	PIGB	SBP_meta_BF05	chr15	55555804	cis	0.14	0.0699	NA	NA	NA
rs11645008	3662808	GPR56	SBP_meta_BF05/DBP_meta_BF05	chr16	57667210	cis	0.356	0.71	NA	NA	NA
rs11665135	3174816	ANXA1	DBP_meta_BF05	chr18	23976352	trans	0.127	0.0401	NA	NA	NA
rs11668524	3822657	CD97	SBP_meta_BF05/DBP_meta_BF05	chr19	14449080	cis	0.593	0.689	NA	NA	NA
rs11668566	3822657	CD97	SBP_meta_BF05/DBP_meta_BF05	chr19	14400417	cis	0.61	0.721	NA	NA	NA
rs11670662	3822657	CD97	SBP_meta_BF05/DBP_meta_BF05	chr19	14384935	cis	0.403	0.578	NA	NA	NA
rs11671010	3830002	GRAMD1A	SBP_meta_BF05/DBP_meta_BF05	chr19	35559474	cis	0.563	0.704	NA	NA	NA
rs11673549	3822657	CD97	SBP_meta_BF05/DBP_meta_BF05	chr19	14383583	cis	0.379	0.552	NA	NA	NA
rs11674181	2491745	GNLY	SBP_meta_BF05	chr2	85946999	cis	0.38	0.575	NA	NA	NA
rs11676464	2491745	GNLY	SBP_meta_BF05	chr2	86018262	cis	0.0699	0.866	NA	NA	NA
rs11678485	2508611	ARHGAP15	DBP_meta_BF05	chr2	143788391	cis	0.867	0.806	NA	NA	NA
rs11679726	2491745	GNLY	SBP_meta_BF05	chr2	86041539	cis	0.958	0.747	NA	NA	NA
rs11680227	2491745	GNLY	SBP_meta_BF05	chr2	85707654	cis	0.746	0.64	NA	NA	NA
rs11684647	2491745	GNLY	SBP_meta_BF05	chr2	85692987	cis	0.358	0.645	NA	NA	NA
rs11685496	2508611	ARHGAP15	DBP_meta_BF05	chr2	143750857	cis	0.578	0.68	NA	NA	NA
rs11688246	2491745	GNLY	SBP_meta_BF05	chr2	85705677	cis	0.652	0.396	NA	NA	NA
rs11688432	2491745	GNLY	SBP_meta_BF05	chr2	85913214	cis	0.427	0.458	NA	NA	NA
rs11688898	2508611	ARHGAP15	DBP_meta_BF05	chr2	144460338	cis	0.497	0.325	NA	NA	NA
rs11690108	2508611	ARHGAP15	DBP_meta_BF05	chr2	143721907	cis	0.378	0.0387	NA	NA	NA
rs11691350	2508611	ARHGAP15	DBP_meta_BF05	chr2	144118162	cis	0.996	0.971	NA	NA	NA
rs11693448	2508611	ARHGAP15	DBP_meta_BF05	chr2	143866399	cis	0.428	0.0395	NA	NA	NA
rs11694505	2508611	ARHGAP15	DBP_meta_BF05	chr2	144301696	cis	0.853	0.495	NA	NA	NA
rs11695402	2491745	GNLY	SBP_meta_BF05	chr2	86500294	cis	0.11	0.0622	NA	NA	NA
rs11711554	2608725	BHLHE40	SBP_meta_BF05/DBP_meta_BF05	chr3	4881689	cis	0.872	0.422	NA	NA	NA
rs11714979	3733275	KCNJ2	HTN_meta_BF05/DBP_meta_BF05	chr3	131443714	trans	0.531	0.55	NA	NA	NA
rs11716050	2608725	BHLHE40	SBP_meta_BF05/DBP_meta_BF05	chr3	5069843	cis	0.95	0.682	NA	NA	NA
rs11718142	2611779	TMEM43	SBP_meta_BF05	chr3	14018793	cis	0.282	0.516	NA	NA	NA
rs11718160	3733275	KCNJ2	HTN_meta_BF05/DBP_meta_BF05	chr3	131435614	trans	0.536	0.636	NA	NA	NA
rs11722737	2761734	FBXL5	DBP_meta_BF05	chr4	15459443	cis	0.359	0.157	NA	NA	NA
rs11722814	3558375	GZMB	HTN_meta_BF05	chr4	88657761	trans	0.538	0.866	NA	NA	NA
rs11723878	2491745	GNLY	SBP_meta_BF05	chr4	38305636	trans	0.48	0.622	NA	NA	NA
rs11723911	2761837	FGFBP2	SBP_meta_BF05	chr4	16032193	cis	0.258	0.225	NA	NA	NA
rs11724635	2761734	FBXL5	DBP_meta_BF05	chr4	15737101	cis	0.268	0.258	Parkinsons disease	BST1	1e-16
rs11726647	2761734	FBXL5	DBP_meta_BF05	chr4	15598478	cis	0.463	0.218	NA	NA	NA
rs11727192	2774971	ANTXR2	DBP_meta_BF05	chr4	80800327	cis	0.497	0.0792	NA	NA	NA
rs11728037	2761734	FBXL5	DBP_meta_BF05	chr4	15594898	cis	0.0143	0.0132	NA	NA	NA
rs11728225	2761734	FBXL5	DBP_meta_BF05	chr4	15463697	cis	0.39	0.175	NA	NA	NA
rs11728564	3558375	GZMB	HTN_meta_BF05	chr4	88625436	trans	0.586	0.991	NA	NA	NA
rs11728800	2761734	FBXL5	DBP_meta_BF05	chr4	15474996	cis	0.249	0.193	NA	NA	NA
rs11729248	2761837	FGFBP2	SBP_meta_BF05	chr4	16033066	cis	0.181	0.123	NA	NA	NA
rs11729955	2761734	FBXL5	DBP_meta_BF05	chr4	15689632	cis	0.462	0.403	NA	NA	NA
rs11730030	2774971	ANTXR2	DBP_meta_BF05	chr4	80988478	cis	0.668	0.76	NA	NA	NA
rs11730088	2761734	FBXL5	DBP_meta_BF05	chr4	15683968	cis	0.244	0.239	NA	NA	NA
rs11730157	2774971	ANTXR2	DBP_meta_BF05	chr4	80679143	cis	0.642	0.968	NA	NA	NA
rs11730315	2774971	ANTXR2	DBP_meta_BF05	chr4	80801065	cis	0.448	0.0646	NA	NA	NA
rs11730943	2761837	FGFBP2	SBP_meta_BF05	chr4	15934405	cis	0.998	0.15	NA	NA	NA
rs11731016	3558375	GZMB	HTN_meta_BF05	chr4	88627678	trans	0.589	0.988	NA	NA	NA
rs11731814	3558375	GZMB	HTN_meta_BF05	chr4	88610761	trans	0.617	0.98	NA	NA	NA
rs11731879	2774971	ANTXR2	DBP_meta_BF05	chr4	80655320	cis	0.837	0.993	NA	NA	NA
rs11733056	2761837	FGFBP2	SBP_meta_BF05	chr4	15968139	cis	0.143	0.517	NA	NA	NA
rs11733869	3558375	GZMB	HTN_meta_BF05	chr4	88608745	trans	0.61	0.977	NA	NA	NA
rs11735052	3558375	GZMB	HTN_meta_BF05	chr4	88609657	trans	0.612	0.988	NA	NA	NA
rs11735728	2774971	ANTXR2	DBP_meta_BF05	chr4	80793114	cis	0.21	0.0753	NA	NA	NA
rs11735976	2761837	FGFBP2	SBP_meta_BF05	chr4	15972905	cis	0.0987	0.178	NA	NA	NA
rs11736795	2761837	FGFBP2	SBP_meta_BF05	chr4	15948933	cis	0.61	0.75	NA	NA	NA
rs11737539	2761734	FBXL5	DBP_meta_BF05	chr4	15448028	cis	0.129	0.0667	NA	NA	NA
rs11740496	2883349	HAVCR2	DBP_meta_BF05	chr5	156435402	cis	0.517	0.618	NA	NA	NA
rs11740499	2883349	HAVCR2	DBP_meta_BF05	chr5	156431741	cis	0.518	0.624	NA	NA	NA
rs11741184	2883349	HAVCR2	DBP_meta_BF05	chr5	156515406	cis	0.662	0.327	NA	NA	NA
rs11742259	2883349	HAVCR2	DBP_meta_BF05	chr5	156541933	cis	0.45	0.185	NA	NA	NA
rs11747996	2608725	BHLHE40	SBP_meta_BF05/DBP_meta_BF05	chr5	167484540	trans	0.0253	0.0138	NA	NA	NA
rs11753677	2982076	TAGAP	HTN_meta_BF05/SBP_meta_BF05	chr6	159109681	cis	0.9	0.274	NA	NA	NA
rs11759145	2982076	TAGAP	HTN_meta_BF05/SBP_meta_BF05	chr6	159331420	cis	0.118	0.656	NA	NA	NA
rs11787959	3185498	SLC31A2	SBP_meta_BF05/DBP_meta_BF05/HTN_meta_BF05	chr9	115935663	cis	0.293	0.146	NA	NA	NA
rs11788245	3174816	ANXA1	DBP_meta_BF05	chr9	75750665	cis	0.755	0.352	NA	NA	NA
rs11788254	3174816	ANXA1	DBP_meta_BF05	chr9	75744535	cis	0.744	0.193	NA	NA	NA
rs11788407	3174816	ANXA1	DBP_meta_BF05	chr9	75745448	cis	0.747	0.361	NA	NA	NA
rs11789755	3185498	SLC31A2	SBP_meta_BF05/DBP_meta_BF05/HTN_meta_BF05	chr9	116055076	cis	0.292	0.284	NA	NA	NA
rs11789773	3174816	ANXA1	DBP_meta_BF05	chr9	76157130	cis	0.371	0.859	NA	NA	NA
rs11790645	3185498	SLC31A2	SBP_meta_BF05/DBP_meta_BF05/HTN_meta_BF05	chr9	115972071	cis	0.273	0.101	NA	NA	NA
rs11790675	3185498	SLC31A2	SBP_meta_BF05/DBP_meta_BF05/HTN_meta_BF05	chr9	115944211	cis	0.281	0.138	NA	NA	NA
rs11791008	3174816	ANXA1	DBP_meta_BF05	chr9	75740113	cis	0.76	0.927	NA	NA	NA
rs11793093	3174816	ANXA1	DBP_meta_BF05	chr9	75794175	cis	0.743	0.351	NA	NA	NA
rs11793226	3185498	SLC31A2	SBP_meta_BF05/DBP_meta_BF05/HTN_meta_BF05	chr9	115953434	cis	0.273	0.138	NA	NA	NA
rs11793978	3185498	SLC31A2	SBP_meta_BF05/DBP_meta_BF05/HTN_meta_BF05	chr9	116009846	cis	0.544	0.266	NA	NA	NA
rs11794048	3185498	SLC31A2	SBP_meta_BF05/DBP_meta_BF05/HTN_meta_BF05	chr9	115915194	cis	0.653	0.397	NA	NA	NA
rs11794852	3174816	ANXA1	DBP_meta_BF05	chr9	76118698	cis	0.402	0.393	NA	NA	NA
rs11794908	3185498	SLC31A2	SBP_meta_BF05/DBP_meta_BF05/HTN_meta_BF05	chr9	115928732	cis	0.312	0.157	NA	NA	NA
rs11795164	3174816	ANXA1	DBP_meta_BF05	chr9	75818300	cis	0.676	0.592	NA	NA	NA
rs11828383	3375735	AHNAK	SBP_meta_BF05	chr11	62067818	cis	0.939	0.381	NA	NA	NA
rs11844124	3558375	GZMB	HTN_meta_BF05	chr14	25049136	cis	0.739	0.825	NA	NA	NA
rs11845762	3558375	GZMB	HTN_meta_BF05	chr14	25251986	cis	0.425	0.738	NA	NA	NA
rs11845764	3558375	GZMB	HTN_meta_BF05	chr14	25252012	cis	0.42	0.741	NA	NA	NA
rs11846223	3558375	GZMB	HTN_meta_BF05	chr14	24864006	cis	0.986	0.557	NA	NA	NA
rs11847024	3550077	GLRX5	SBP_meta_BF05	chr14	96073571	cis	0.783	0.234	NA	NA	NA
rs11848697	3558375	GZMB	HTN_meta_BF05	chr14	24933762	cis	0.411	0.554	NA	NA	NA
rs11849462	3550077	GLRX5	SBP_meta_BF05	chr14	96091347	cis	0.404	0.84	NA	NA	NA
rs11851426	3558375	GZMB	HTN_meta_BF05	chr14	25048056	cis	0.779	0.822	NA	NA	NA
rs11851739	3558375	GZMB	HTN_meta_BF05	chr14	24941404	cis	0.444	0.614	NA	NA	NA
rs11855084	3594825	PIGB	SBP_meta_BF05	chr15	55581683	cis	0.0782	0.0432	NA	NA	NA
rs11857829	3594825	PIGB	SBP_meta_BF05	chr15	55581242	cis	0.087	0.0529	NA	NA	NA
rs1186688	2439842	TAGLN2	SBP_meta_BF05	chr1	160024883	cis	0.953	0.79	NA	NA	NA
rs1186689	2439842	TAGLN2	SBP_meta_BF05	chr1	160023053	cis	0.967	0.784	NA	NA	NA
rs11870887	3550077	GLRX5	SBP_meta_BF05	chr17	10051068	trans	0.964	0.846	NA	NA	NA
rs11880224	3236958	VIM	DBP_meta_BF05	chr19	3664016	trans	0.561	0.542	NA	NA	NA
rs11881372	3868998	NKG7	SBP_meta_BF05	chr19	51860656	cis	0.337	0.128	NA	NA	NA
rs11885214	2491745	GNLY	SBP_meta_BF05	chr2	85917471	cis	0.92	0.993	NA	NA	NA
rs11887074	2508611	ARHGAP15	DBP_meta_BF05	chr2	144289061	cis	0.499	0.62	NA	NA	NA
rs11887600	2491745	GNLY	SBP_meta_BF05	chr2	85924088	cis	0.194	0.0517	NA	NA	NA
rs11887686	2491745	GNLY	SBP_meta_BF05	chr2	85924131	cis	0.208	0.0583	NA	NA	NA
rs11889899	2508611	ARHGAP15	DBP_meta_BF05	chr2	144287460	cis	0.698	0.278	NA	NA	NA
rs11890035	2508611	ARHGAP15	DBP_meta_BF05	chr2	144118862	cis	0.659	0.314	NA	NA	NA
rs11890239	2520533	OBFC2A	DBP_meta_BF05	chr2	192643022	cis	0.137	0.0524	NA	NA	NA
rs11892116	2508611	ARHGAP15	DBP_meta_BF05	chr2	144195753	cis	0.464	0.168	NA	NA	NA
rs11894945	2491745	GNLY	SBP_meta_BF05	chr2	85904242	cis	0.859	0.735	NA	NA	NA
rs11896795	2491745	GNLY	SBP_meta_BF05	chr2	85935865	cis	0.222	0.0488	NA	NA	NA
rs11898020	2508611	ARHGAP15	DBP_meta_BF05	chr2	144282078	cis	0.55	0.692	NA	NA	NA
rs11898889	2508611	ARHGAP15	DBP_meta_BF05	chr2	143876423	cis	0.467	0.373	NA	NA	NA
rs11904671	2508611	ARHGAP15	DBP_meta_BF05	chr2	144052606	cis	0.26	0.137	NA	NA	NA
rs11920786	2608725	BHLHE40	SBP_meta_BF05/DBP_meta_BF05	chr3	5029354	cis	0.461	0.693	NA	NA	NA
rs11927267	2611779	TMEM43	SBP_meta_BF05	chr3	14073992	cis	0.419	0.439	NA	NA	NA
rs11927889	2608725	BHLHE40	SBP_meta_BF05/DBP_meta_BF05	chr3	5030033	cis	0.576	0.502	NA	NA	NA
rs11930598	2774971	ANTXR2	DBP_meta_BF05	chr4	80731524	cis	0.8	0.907	NA	NA	NA
rs11931136	2774971	ANTXR2	DBP_meta_BF05	chr4	80807604	cis	0.637	0.849	NA	NA	NA
rs11931463	2774971	ANTXR2	DBP_meta_BF05	chr4	80731390	cis	0.755	0.899	NA	NA	NA
rs11932730	2761734	FBXL5	DBP_meta_BF05	chr4	15565758	cis	0.348	0.157	NA	NA	NA
rs11933202	2761734	FBXL5	DBP_meta_BF05	chr4	15744528	cis	0.136	0.611	NA	NA	NA
rs11934015	2761734	FBXL5	DBP_meta_BF05	chr4	15412142	cis	0.163	0.19	NA	NA	NA
rs11934811	2761734	FBXL5	DBP_meta_BF05	chr4	15738253	cis	0.533	0.697	NA	NA	NA
rs11934958	2774971	ANTXR2	DBP_meta_BF05	chr4	80935235	cis	0.425	0.672	NA	NA	NA
rs11938096	2774971	ANTXR2	DBP_meta_BF05	chr4	80751736	cis	0.895	0.798	NA	NA	NA
rs11938689	2761837	FGFBP2	SBP_meta_BF05	chr4	15994984	cis	0.328	0.121	NA	NA	NA
rs11939567	2761734	FBXL5	DBP_meta_BF05	chr4	15765075	cis	0.125	0.962	NA	NA	NA
rs11939942	2774971	ANTXR2	DBP_meta_BF05	chr4	80623147	cis	0.878	0.895	NA	NA	NA
rs11943223	2761734	FBXL5	DBP_meta_BF05	chr4	15399340	cis	0.0771	0.138	NA	NA	NA
rs11943501	2761734	FBXL5	DBP_meta_BF05	chr4	15738166	cis	0.649	0.851	NA	NA	NA
rs11943513	2774971	ANTXR2	DBP_meta_BF05	chr4	80743976	cis	0.635	0.699	NA	NA	NA
rs11945730	2761734	FBXL5	DBP_meta_BF05	chr4	15773008	cis	0.136	0.0991	NA	NA	NA
rs11947310	2761734	FBXL5	DBP_meta_BF05	chr4	15744576	cis	0.653	0.926	NA	NA	NA
rs11959615	2448382	PTGS2	DBP_meta_BF05	chr5	148201316	trans	0.718	0.951	NA	NA	NA
rs11998759	3174816	ANXA1	DBP_meta_BF05	chr9	75962650	cis	0.942	0.486	NA	NA	NA
rs11999425	3174816	ANXA1	DBP_meta_BF05	chr9	75990621	cis	0.872	0.552	NA	NA	NA
rs12000367	3174816	ANXA1	DBP_meta_BF05	chr9	75930236	cis	0.966	0.415	NA	NA	NA
rs12000840	3174816	ANXA1	DBP_meta_BF05	chr9	75774574	cis	0.662	0.732	NA	NA	NA
rs12000896	3174816	ANXA1	DBP_meta_BF05	chr9	76039255	cis	0.884	0.533	NA	NA	NA
rs12001114	3174816	ANXA1	DBP_meta_BF05	chr9	75872324	cis	0.439	0.165	NA	NA	NA
rs12002012	3174816	ANXA1	DBP_meta_BF05	chr9	75952733	cis	0.988	0.435	NA	NA	NA
rs12004817	3174816	ANXA1	DBP_meta_BF05	chr9	75750146	cis	0.761	0.306	NA	NA	NA
rs12005891	3174816	ANXA1	DBP_meta_BF05	chr9	75990671	cis	0.863	0.558	NA	NA	NA
rs12006029	3185498	SLC31A2	SBP_meta_BF05/DBP_meta_BF05/HTN_meta_BF05	chr9	116095355	cis	0.816	0.488	NA	NA	NA
rs12006282	3174816	ANXA1	DBP_meta_BF05	chr9	76026734	cis	0.326	0.212	NA	NA	NA
rs12029359	2434438	MCL1	SBP_meta_BF05	chr1	150432802	cis	0.184	0.113	NA	NA	NA
rs12047808	3544525	FOS	SBP_meta_BF05	chr1	179469314	trans	0.303	0.225	Multiple sclerosis (age of onset)	C1orf125	6e-06
rs12050232	3550077	GLRX5	SBP_meta_BF05	chr14	96009962	cis	NA	NA	NA	NA	NA
rs12050587	3594825	PIGB	SBP_meta_BF05	chr15	55627528	cis	0.218	0.421	NA	NA	NA
rs12050885	3594825	PIGB	SBP_meta_BF05	chr15	55558624	cis	0.417	0.374	NA	NA	NA
rs12051608	3733275	KCNJ2	HTN_meta_BF05/DBP_meta_BF05	chr17	68126634	cis	0.374	0.0577	NA	NA	NA
rs12052670	2508611	ARHGAP15	DBP_meta_BF05	chr2	144363902	cis	0.793	0.905	NA	NA	NA
rs12055072	3868998	NKG7	SBP_meta_BF05	chr5	100719671	trans	0.147	0.0562	NA	NA	NA
rs12062681	2448382	PTGS2	DBP_meta_BF05	chr1	186952288	cis	NA	NA	NA	NA	NA
rs12064238	2448382	PTGS2	DBP_meta_BF05	chr1	186659125	cis	0.543	0.0527	NA	NA	NA
rs12064727	2435383	S100A10	DBP_meta_BF05	chr1	230624383	trans	0.162	0.232	NA	NA	NA
rs12069254	2448382	PTGS2	DBP_meta_BF05	chr1	186196396	cis	NA	NA	NA	NA	NA
rs12078214	2448382	PTGS2	DBP_meta_BF05	chr1	186968180	cis	0.794	0.726	NA	NA	NA
rs12083193	2435383	S100A10	DBP_meta_BF05	chr1	151962689	cis	0.576	0.777	NA	NA	NA
rs12085336	2434438	MCL1	SBP_meta_BF05	chr1	150775780	cis	0.535	0.777	NA	NA	NA
rs12091045	2448382	PTGS2	DBP_meta_BF05	chr1	186850307	cis	0.89	0.289	NA	NA	NA
rs12097158	3185498	SLC31A2	SBP_meta_BF05/DBP_meta_BF05/HTN_meta_BF05	chr1	233929467	trans	0.104	0.179	NA	NA	NA
rs12100565	3558375	GZMB	HTN_meta_BF05	chr14	24974920	cis	0.823	0.84	NA	NA	NA
rs12103178	3662808	GPR56	SBP_meta_BF05/DBP_meta_BF05	chr16	57668728	cis	0.465	0.698	NA	NA	NA
rs12115244	3174816	ANXA1	DBP_meta_BF05	chr9	76108768	cis	0.92	0.452	NA	NA	NA
rs12115388	3185498	SLC31A2	SBP_meta_BF05/DBP_meta_BF05/HTN_meta_BF05	chr9	115935532	cis	0.407	0.695	NA	NA	NA
rs12116492	2434438	MCL1	SBP_meta_BF05	chr1	150534368	cis	NA	NA	NA	NA	NA
rs12116694	2448382	PTGS2	DBP_meta_BF05	chr1	186968220	cis	0.374	0.78	NA	NA	NA
rs12122337	2439842	TAGLN2	SBP_meta_BF05	chr1	159886422	cis	0.308	0.37	NA	NA	NA
rs12122979	2439842	TAGLN2	SBP_meta_BF05	chr1	160023092	cis	0.948	0.815	NA	NA	NA
rs12125857	2448382	PTGS2	DBP_meta_BF05	chr1	186929551	cis	0.699	0.61	NA	NA	NA
rs12128551	2448382	PTGS2	DBP_meta_BF05	chr1	186907046	cis	0.586	0.698	NA	NA	NA
rs12139175	2439842	TAGLN2	SBP_meta_BF05	chr1	159902786	cis	0.949	0.651	NA	NA	NA
rs12144159	2448382	PTGS2	DBP_meta_BF05	chr1	186934187	cis	0.904	0.733	NA	NA	NA
rs12147096	3558375	GZMB	HTN_meta_BF05	chr14	25138299	cis	0.464	0.676	NA	NA	NA
rs12147128	3558375	GZMB	HTN_meta_BF05	chr14	25083815	cis	0.974	0.757	NA	NA	NA
rs12147631	3550077	GLRX5	SBP_meta_BF05	chr14	96015186	cis	0.659	0.701	NA	NA	NA
rs12149502	2761837	FGFBP2	SBP_meta_BF05	chr16	57860333	trans	0.302	0.755	NA	NA	NA
rs12150382	3733275	KCNJ2	HTN_meta_BF05/DBP_meta_BF05	chr17	68222772	cis	0.0552	0.167	NA	NA	NA
rs12150626	3733275	KCNJ2	HTN_meta_BF05/DBP_meta_BF05	chr17	68237741	cis	NA	NA	NA	NA	NA
rs12151621	2491745	GNLY	SBP_meta_BF05	chr2	85934499	cis	0.483	0.0453	NA	NA	NA
rs12151742	2491745	GNLY	SBP_meta_BF05	chr2	85933003	cis	0.489	0.0418	NA	NA	NA
rs12177758	2448382	PTGS2	DBP_meta_BF05	NA	NA	trans	NA	NA	NA	NA	NA
rs12192266	2982076	TAGAP	HTN_meta_BF05/SBP_meta_BF05	chr6	159475535	cis	0.961	0.654	NA	NA	NA
rs12221306	3236958	VIM	DBP_meta_BF05	chr10	17001338	cis	0.0782	0.425	NA	NA	NA
rs12225213	3375735	AHNAK	SBP_meta_BF05	chr11	62350248	cis	0.178	0.216	NA	NA	NA
rs12236187	3185498	SLC31A2	SBP_meta_BF05/DBP_meta_BF05/HTN_meta_BF05	chr9	115954969	cis	0.391	0.709	NA	NA	NA
rs12239324	2448382	PTGS2	DBP_meta_BF05	chr1	186767709	cis	0.913	0.777	NA	NA	NA
rs12246478	3594825	PIGB	SBP_meta_BF05	chr10	29124845	trans	0.201	0.396	NA	NA	NA
rs12266606	3236958	VIM	DBP_meta_BF05	chr10	17250328	cis	0.423	0.975	NA	NA	NA
rs1227132	2491745	GNLY	SBP_meta_BF05	chr2	168409393	trans	0.402	0.973	NA	NA	NA
rs12336832	3185498	SLC31A2	SBP_meta_BF05/DBP_meta_BF05/HTN_meta_BF05	chr9	116032808	cis	0.91	0.799	NA	NA	NA
rs12337498	3185498	SLC31A2	SBP_meta_BF05/DBP_meta_BF05/HTN_meta_BF05	chr9	116031640	cis	0.176	0.0615	NA	NA	NA
rs12337552	3185498	SLC31A2	SBP_meta_BF05/DBP_meta_BF05/HTN_meta_BF05	chr9	116089585	cis	0.811	0.517	NA	NA	NA
rs12339193	3174816	ANXA1	DBP_meta_BF05	chr9	76185813	cis	0.399	0.242	NA	NA	NA
rs12339424	3185498	SLC31A2	SBP_meta_BF05/DBP_meta_BF05/HTN_meta_BF05	chr9	115953556	cis	0.592	0.211	NA	NA	NA
rs12339650	3174816	ANXA1	DBP_meta_BF05	chr9	75910265	cis	0.867	0.75	NA	NA	NA
rs12339716	3174816	ANXA1	DBP_meta_BF05	chr9	75910400	cis	0.862	0.747	NA	NA	NA
rs12340547	3174816	ANXA1	DBP_meta_BF05	chr9	75710326	cis	0.336	0.284	NA	NA	NA
rs12342197	3185498	SLC31A2	SBP_meta_BF05/DBP_meta_BF05/HTN_meta_BF05	chr9	116051067	cis	0.952	0.652	NA	NA	NA
rs12342334	3185498	SLC31A2	SBP_meta_BF05/DBP_meta_BF05/HTN_meta_BF05	chr9	116128568	cis	0.432	0.435	NA	NA	NA
rs12342505	3174816	ANXA1	DBP_meta_BF05	chr9	75972651	cis	0.417	0.196	NA	NA	NA
rs12342549	3185498	SLC31A2	SBP_meta_BF05/DBP_meta_BF05/HTN_meta_BF05	chr9	116041061	cis	0.991	0.664	NA	NA	NA
rs12343120	3174816	ANXA1	DBP_meta_BF05	chr9	75974387	cis	0.416	0.192	NA	NA	NA
rs12343428	3174816	ANXA1	DBP_meta_BF05	chr9	75900508	cis	0.937	0.814	NA	NA	NA
rs12343629	3185498	SLC31A2	SBP_meta_BF05/DBP_meta_BF05/HTN_meta_BF05	chr9	116041581	cis	0.253	0.276	NA	NA	NA
rs12344443	3185498	SLC31A2	SBP_meta_BF05/DBP_meta_BF05/HTN_meta_BF05	chr9	115953832	cis	0.595	0.218	NA	NA	NA
rs12344670	3174816	ANXA1	DBP_meta_BF05	chr9	75770912	cis	0.674	0.764	NA	NA	NA
rs12346816	3185498	SLC31A2	SBP_meta_BF05/DBP_meta_BF05/HTN_meta_BF05	chr9	115955553	cis	0.384	0.697	NA	NA	NA
rs12347767	3185498	SLC31A2	SBP_meta_BF05/DBP_meta_BF05/HTN_meta_BF05	chr9	115889973	cis	0.44	0.412	NA	NA	NA
rs12348629	3185498	SLC31A2	SBP_meta_BF05/DBP_meta_BF05/HTN_meta_BF05	chr9	116042118	cis	0.972	0.662	NA	NA	NA
rs12349383	3174816	ANXA1	DBP_meta_BF05	chr9	75883860	cis	0.853	0.587	NA	NA	NA
rs12349500	3185498	SLC31A2	SBP_meta_BF05/DBP_meta_BF05/HTN_meta_BF05	chr9	116061904	cis	0.963	0.745	NA	NA	NA
rs12350438	3185498	SLC31A2	SBP_meta_BF05/DBP_meta_BF05/HTN_meta_BF05	chr9	115942498	cis	0.491	0.898	NA	NA	NA
rs12351659	3174816	ANXA1	DBP_meta_BF05	chr9	76161708	cis	NA	NA	NA	NA	NA
rs12351872	3174816	ANXA1	DBP_meta_BF05	chr9	76192308	cis	0.556	0.299	NA	NA	NA
rs12352536	3185498	SLC31A2	SBP_meta_BF05/DBP_meta_BF05/HTN_meta_BF05	chr9	115929141	cis	0.422	0.679	NA	NA	NA
rs12352548	3185498	SLC31A2	SBP_meta_BF05/DBP_meta_BF05/HTN_meta_BF05	chr9	116125776	cis	0.446	0.313	NA	NA	NA
rs12352784	3185498	SLC31A2	SBP_meta_BF05/DBP_meta_BF05/HTN_meta_BF05	chr9	116045074	cis	0.974	0.648	NA	NA	NA
rs12352925	3185498	SLC31A2	SBP_meta_BF05/DBP_meta_BF05/HTN_meta_BF05	chr9	116042177	cis	0.97	0.659	NA	NA	NA
rs12354706	3236958	VIM	DBP_meta_BF05	chr10	17187598	cis	0.455	0.757	NA	NA	NA
rs12357675	3236958	VIM	DBP_meta_BF05	chr10	17224143	cis	0.453	0.847	NA	NA	NA
rs12359150	3236958	VIM	DBP_meta_BF05	chr10	17032590	cis	0.466	0.635	NA	NA	NA
rs12370770	3862108	CLC	DBP_meta_BF05	chr12	112277084	trans	NA	NA	NA	NA	NA
rs12375571	3174816	ANXA1	DBP_meta_BF05	chr9	75989885	cis	0.825	0.183	NA	NA	NA
rs12376805	3174816	ANXA1	DBP_meta_BF05	chr9	75753144	cis	0.74	0.879	NA	NA	NA
rs12379009	3174816	ANXA1	DBP_meta_BF05	chr9	75773029	cis	0.131	0.19	NA	NA	NA
rs12380325	3185498	SLC31A2	SBP_meta_BF05/DBP_meta_BF05/HTN_meta_BF05	chr9	115964664	cis	0.211	0.044	NA	NA	NA
rs12406858	3550077	GLRX5	SBP_meta_BF05	chr1	118141492	trans	0.373	0.616	NA	NA	NA
rs12408825	3550077	GLRX5	SBP_meta_BF05	chr1	118158355	trans	0.655	0.262	NA	NA	NA
rs12409929	3550077	GLRX5	SBP_meta_BF05	chr1	118140342	trans	0.755	0.257	NA	NA	NA
rs12412031	3236958	VIM	DBP_meta_BF05	chr10	17213684	cis	0.462	0.818	NA	NA	NA
rs12431440	3550077	GLRX5	SBP_meta_BF05	chr14	95993103	cis	0.254	0.212	NA	NA	NA
rs12431494	3550077	GLRX5	SBP_meta_BF05	chr14	95993386	cis	0.178	0.224	NA	NA	NA
rs12432056	3558375	GZMB	HTN_meta_BF05	chr14	25208654	cis	0.47	0.839	NA	NA	NA
rs12432208	3558375	GZMB	HTN_meta_BF05	chr14	25143509	cis	0.642	0.917	NA	NA	NA
rs12432425	3550077	GLRX5	SBP_meta_BF05	chr14	96107347	cis	0.234	0.82	NA	NA	NA
rs12432435	3550077	GLRX5	SBP_meta_BF05	chr14	96107176	cis	0.229	0.814	NA	NA	NA
rs12433068	3558375	GZMB	HTN_meta_BF05	chr14	25162082	cis	0.546	0.882	NA	NA	NA
rs12433094	3550077	GLRX5	SBP_meta_BF05	chr14	96037878	cis	0.662	0.118	NA	NA	NA
rs12433744	3550077	GLRX5	SBP_meta_BF05	chr14	96038182	cis	0.64	0.247	NA	NA	NA
rs12433865	3550077	GLRX5	SBP_meta_BF05	chr14	96114227	cis	0.326	0.966	NA	NA	NA
rs12434702	3558375	GZMB	HTN_meta_BF05	chr14	25146770	cis	0.589	0.904	NA	NA	NA
rs12436189	3550077	GLRX5	SBP_meta_BF05	chr14	96037810	cis	0.674	0.12	NA	NA	NA
rs12436713	3558375	GZMB	HTN_meta_BF05	chr14	24953265	cis	0.499	0.695	NA	NA	NA
rs12436734	3550077	GLRX5	SBP_meta_BF05	chr14	96059927	cis	0.535	0.204	NA	NA	NA
rs12440661	3959986	IL2RB	DBP_meta_BF05	chr15	70733249	trans	0.974	0.728	NA	NA	NA
rs12440680	3594825	PIGB	SBP_meta_BF05	chr15	55683140	cis	0.76	0.967	NA	NA	NA
rs12446402	3662808	GPR56	SBP_meta_BF05/DBP_meta_BF05	chr16	57672186	cis	0.725	0.909	NA	NA	NA
rs12449606	3733275	KCNJ2	HTN_meta_BF05/DBP_meta_BF05	chr17	68148811	cis	0.229	0.377	NA	NA	NA
rs12451657	3733275	KCNJ2	HTN_meta_BF05/DBP_meta_BF05	chr17	68146450	cis	0.561	0.225	NA	NA	NA
rs12452512	3733275	KCNJ2	HTN_meta_BF05/DBP_meta_BF05	chr17	68149139	cis	0.243	0.361	NA	NA	NA
rs12453808	3733275	KCNJ2	HTN_meta_BF05/DBP_meta_BF05	chr17	68150722	cis	0.232	0.409	NA	NA	NA
rs12461075	3838004	PPP1R15A	SBP_meta_BF05	chr19	49399821	cis	0.329	0.216	NA	NA	NA
rs12461158	3830002	GRAMD1A	SBP_meta_BF05/DBP_meta_BF05	chr19	35540882	cis	0.489	0.765	NA	NA	NA
rs12461410	3868998	NKG7	SBP_meta_BF05	chr19	51865272	cis	0.181	0.138	NA	NA	NA
rs12461697	3862108	CLC	DBP_meta_BF05	chr19	40178803	cis	0.811	0.757	NA	NA	NA
rs12462403	3293435	PRF1	SBP_meta_BF05/DBP_meta_BF05	chr19	43853799	trans	0.199	0.00904	NA	NA	NA
rs12463405	2761837	FGFBP2	SBP_meta_BF05	chr2	175095813	trans	0.125	0.608	NA	NA	NA
rs12463485	2508611	ARHGAP15	DBP_meta_BF05	chr2	143776530	cis	0.659	0.791	NA	NA	NA
rs12463967	2761837	FGFBP2	SBP_meta_BF05	chr2	174968447	trans	0.0853	0.423	NA	NA	NA
rs12464592	2761837	FGFBP2	SBP_meta_BF05	chr2	174974010	trans	0.0759	0.38	NA	NA	NA
rs12465686	2491745	GNLY	SBP_meta_BF05	chr2	85647589	cis	0.709	0.263	NA	NA	NA
rs12466715	2508611	ARHGAP15	DBP_meta_BF05	chr2	143751071	cis	0.551	0.316	NA	NA	NA
rs12468257	2761837	FGFBP2	SBP_meta_BF05	chr2	175093438	trans	0.109	0.574	NA	NA	NA
rs12468993	2761837	FGFBP2	SBP_meta_BF05	chr2	174944519	trans	0.0728	0.386	NA	NA	NA
rs12469809	2508611	ARHGAP15	DBP_meta_BF05	chr2	143465119	cis	0.842	0.408	NA	NA	NA
rs12471500	2761837	FGFBP2	SBP_meta_BF05	chr2	175021702	trans	0.0914	0.511	NA	NA	NA
rs12472343	2520533	OBFC2A	DBP_meta_BF05	chr2	192525536	cis	0.756	0.347	NA	NA	NA
rs12473994	2761837	FGFBP2	SBP_meta_BF05	chr2	175057751	trans	0.0904	0.505	NA	NA	NA
rs12474604	2508611	ARHGAP15	DBP_meta_BF05	chr2	143858871	cis	0.99	0.935	NA	NA	NA
rs12474789	2761837	FGFBP2	SBP_meta_BF05	chr2	175084751	trans	0.0892	0.498	NA	NA	NA
rs12474881	2761837	FGFBP2	SBP_meta_BF05	chr2	175085041	trans	0.0813	0.474	NA	NA	NA
rs12476255	2761837	FGFBP2	SBP_meta_BF05	chr2	175005384	trans	0.0866	0.475	NA	NA	NA
rs12477146	2508611	ARHGAP15	DBP_meta_BF05	chr2	143793814	cis	0.394	0.15	NA	NA	NA
rs12479940	3174816	ANXA1	DBP_meta_BF05	chr20	49077551	trans	0.538	0.924	NA	NA	NA
rs12485738	2439842	TAGLN2	SBP_meta_BF05	chr3	56865776	trans	0.214	0.257	NA	NA	NA
rs12485738	2439842	TAGLN2	SBP_meta_BF05	chr3	56865776	trans	0.214	0.257	NA	NA	NA
rs12490233	2611779	TMEM43	SBP_meta_BF05	chr3	13977365	cis	0.323	0.483	NA	NA	NA
rs12491506	2611779	TMEM43	SBP_meta_BF05	chr3	14257187	cis	0.187	0.262	NA	NA	NA
rs12493301	2611779	TMEM43	SBP_meta_BF05	chr3	14252265	cis	0.722	0.93	NA	NA	NA
rs12500154	3558375	GZMB	HTN_meta_BF05	chr4	137737877	trans	0.309	0.342	NA	NA	NA
rs12500458	2761734	FBXL5	DBP_meta_BF05	chr4	15478101	cis	0.271	0.197	NA	NA	NA
rs12500587	2761734	FBXL5	DBP_meta_BF05	chr4	15580754	cis	0.0348	0.019	NA	NA	NA
rs12502586	2761734	FBXL5	DBP_meta_BF05	chr4	15726564	cis	0.311	0.758	NA	NA	NA
rs12503130	2761837	FGFBP2	SBP_meta_BF05	chr4	15935268	cis	0.96	0.28	NA	NA	NA
rs12503191	2761837	FGFBP2	SBP_meta_BF05	chr4	15935497	cis	0.65	0.139	NA	NA	NA
rs12503796	2761837	FGFBP2	SBP_meta_BF05	chr4	15940231	cis	0.907	0.323	NA	NA	NA
rs12504282	2774971	ANTXR2	DBP_meta_BF05	chr4	80927001	cis	0.271	0.283	NA	NA	NA
rs12504895	2761837	FGFBP2	SBP_meta_BF05	chr4	15958890	cis	0.219	0.0936	NA	NA	NA
rs12506181	2761837	FGFBP2	SBP_meta_BF05	chr4	15967777	cis	0.53	0.99	NA	NA	NA
rs12506877	2774971	ANTXR2	DBP_meta_BF05	chr4	80610992	cis	0.894	0.515	NA	NA	NA
rs12506940	2774971	ANTXR2	DBP_meta_BF05	chr4	80618320	cis	0.977	0.593	NA	NA	NA
rs12508107	2761837	FGFBP2	SBP_meta_BF05	chr4	15974222	cis	0.226	0.188	NA	NA	NA
rs12508186	2761734	FBXL5	DBP_meta_BF05	chr4	15548415	cis	0.555	0.282	NA	NA	NA
rs12508916	2883349	HAVCR2	DBP_meta_BF05	chr4	42493541	trans	0.417	0.369	NA	NA	NA
rs12509658	2774971	ANTXR2	DBP_meta_BF05	chr4	80979409	cis	0.323	0.449	NA	NA	NA
rs12509837	2774971	ANTXR2	DBP_meta_BF05	chr4	80949814	cis	0.314	0.592	NA	NA	NA
rs12509859	2761837	FGFBP2	SBP_meta_BF05	chr4	15950731	cis	0.428	0.56	NA	NA	NA
rs12512355	2761837	FGFBP2	SBP_meta_BF05	chr4	16001591	cis	0.191	0.692	NA	NA	NA
rs12515585	2883349	HAVCR2	DBP_meta_BF05	chr5	156430150	cis	0.447	0.528	NA	NA	NA
rs12523560	3868998	NKG7	SBP_meta_BF05	chr5	100660062	trans	0.112	0.0335	NA	NA	NA
rs12529	2435383	S100A10	DBP_meta_BF05	chr10	5136651	trans	0.337	0.686	NA	NA	NA
rs1254900	2491745	GNLY	SBP_meta_BF05	chr2	85816334	cis	0.67	0.521	NA	NA	NA
rs12552642	3174816	ANXA1	DBP_meta_BF05	chr9	76157987	cis	0.539	0.524	NA	NA	NA
rs12552837	3174816	ANXA1	DBP_meta_BF05	chr9	75764127	cis	0.964	0.998	NA	NA	NA
rs12553493	3174816	ANXA1	DBP_meta_BF05	chr9	76155614	cis	0.448	0.349	NA	NA	NA
rs12555078	3174816	ANXA1	DBP_meta_BF05	chr9	76157700	cis	0.409	0.326	NA	NA	NA
rs12555899	3174816	ANXA1	DBP_meta_BF05	chr9	76184567	cis	0.13	0.152	NA	NA	NA
rs12562192	3185498	SLC31A2	SBP_meta_BF05/DBP_meta_BF05/HTN_meta_BF05	chr1	240559446	trans	0.461	0.963	NA	NA	NA
rs12564966	2448382	PTGS2	DBP_meta_BF05	chr1	186953521	cis	0.616	0.123	NA	NA	NA
rs12566232	2435383	S100A10	DBP_meta_BF05	chr1	151839838	cis	0.494	0.696	NA	NA	NA
rs12568757	2434438	MCL1	SBP_meta_BF05	chr1	150729793	cis	0.705	0.628	NA	NA	NA
rs12570337	2448382	PTGS2	DBP_meta_BF05	chr10	83125807	trans	0.774	0.838	NA	NA	NA
rs12586762	3550077	GLRX5	SBP_meta_BF05	chr14	96260501	cis	0.7	0.487	NA	NA	NA
rs12587280	3550077	GLRX5	SBP_meta_BF05	chr14	96060101	cis	0.578	0.217	NA	NA	NA
rs12588792	3550077	GLRX5	SBP_meta_BF05	chr14	96023421	cis	0.0534	0.0195	NA	NA	NA
rs12589666	3558375	GZMB	HTN_meta_BF05	chr14	24992619	cis	0.721	0.782	NA	NA	NA
rs12590407	3558375	GZMB	HTN_meta_BF05	chr14	24835115	cis	0.196	0.114	NA	NA	NA
rs12596607	3662808	GPR56	SBP_meta_BF05/DBP_meta_BF05	chr16	57677041	cis	0.877	0.346	NA	NA	NA
rs12601653	3733275	KCNJ2	HTN_meta_BF05/DBP_meta_BF05	chr17	68198835	cis	0.454	0.734	NA	NA	NA
rs12610961	3868998	NKG7	SBP_meta_BF05	chr19	51867342	cis	0.0901	0.205	NA	NA	NA
rs12613508	2491745	GNLY	SBP_meta_BF05	chr2	85700178	cis	0.195	0.381	NA	NA	NA
rs12614441	2491745	GNLY	SBP_meta_BF05	chr2	85673487	cis	0.956	0.99	NA	NA	NA
rs12614548	2520533	OBFC2A	DBP_meta_BF05	chr2	192533510	cis	0.858	0.675	NA	NA	NA
rs12617759	2520533	OBFC2A	DBP_meta_BF05	chr2	192518934	cis	0.376	0.164	NA	NA	NA
rs12617890	2520533	OBFC2A	DBP_meta_BF05	chr2	192519227	cis	0.416	0.187	NA	NA	NA
rs12620051	2508611	ARHGAP15	DBP_meta_BF05	chr2	143745818	cis	0.686	0.75	NA	NA	NA
rs12620113	2491745	GNLY	SBP_meta_BF05	chr2	85936833	cis	0.387	0.109	NA	NA	NA
rs12620454	2761837	FGFBP2	SBP_meta_BF05	chr2	175063714	trans	0.0963	0.466	NA	NA	NA
rs12621189	2520533	OBFC2A	DBP_meta_BF05	chr2	192519117	cis	0.37	0.164	NA	NA	NA
rs12622510	2761837	FGFBP2	SBP_meta_BF05	chr2	174996828	trans	0.0853	0.464	NA	NA	NA
rs12623517	2761837	FGFBP2	SBP_meta_BF05	chr2	175088297	trans	0.0975	0.534	NA	NA	NA
rs12630368	2608725	BHLHE40	SBP_meta_BF05/DBP_meta_BF05	chr3	5055140	cis	0.426	0.799	NA	NA	NA
rs12640192	2761734	FBXL5	DBP_meta_BF05	chr4	15684234	cis	0.299	0.121	NA	NA	NA
rs12641356	2774971	ANTXR2	DBP_meta_BF05	chr4	80942363	cis	0.125	0.103	NA	NA	NA
rs12643227	2774971	ANTXR2	DBP_meta_BF05	chr4	80944880	cis	0.805	0.234	NA	NA	NA
rs12643418	2774971	ANTXR2	DBP_meta_BF05	chr4	80615479	cis	0.993	0.603	NA	NA	NA
rs12644137	2774971	ANTXR2	DBP_meta_BF05	chr4	80946779	cis	0.122	0.102	NA	NA	NA
rs12644506	2761734	FBXL5	DBP_meta_BF05	chr4	15799878	cis	0.559	0.0906	NA	NA	NA
rs12645327	2774971	ANTXR2	DBP_meta_BF05	chr4	80895091	cis	0.723	0.192	NA	NA	NA
rs12645809	2774971	ANTXR2	DBP_meta_BF05	chr4	80948670	cis	0.893	0.395	NA	NA	NA
rs12645849	2761734	FBXL5	DBP_meta_BF05	chr4	15629080	cis	0.344	0.176	NA	NA	NA
rs12646109	2774971	ANTXR2	DBP_meta_BF05	chr4	80946427	cis	0.888	0.388	NA	NA	NA
rs12646448	2774971	ANTXR2	DBP_meta_BF05	chr4	80941739	cis	0.782	0.233	NA	NA	NA
rs12647844	2761734	FBXL5	DBP_meta_BF05	chr4	15766933	cis	0.161	0.0785	NA	NA	NA
rs12647878	2774971	ANTXR2	DBP_meta_BF05	chr4	80857072	cis	0.65	0.173	NA	NA	NA
rs12649803	2761734	FBXL5	DBP_meta_BF05	chr4	15577587	cis	0.105	0.00589	NA	NA	NA
rs12649852	2761837	FGFBP2	SBP_meta_BF05	chr4	15982480	cis	0.332	0.955	NA	NA	NA
rs12649940	2774971	ANTXR2	DBP_meta_BF05	chr4	80615084	cis	0.999	0.605	NA	NA	NA
rs12651314	2761734	FBXL5	DBP_meta_BF05	chr4	15753570	cis	0.0322	0.183	NA	NA	NA
rs12651388	2774971	ANTXR2	DBP_meta_BF05	chr4	80996125	cis	0.548	0.977	NA	NA	NA
rs12651550	2761734	FBXL5	DBP_meta_BF05	chr4	15641018	cis	0.0248	0.00948	NA	NA	NA
rs12683427	3174816	ANXA1	DBP_meta_BF05	chr9	76109968	cis	0.584	0.707	NA	NA	NA
rs12683772	3174816	ANXA1	DBP_meta_BF05	chr9	76123541	cis	0.407	0.391	NA	NA	NA
rs12684417	3185498	SLC31A2	SBP_meta_BF05/DBP_meta_BF05/HTN_meta_BF05	chr9	115952895	cis	0.364	0.695	NA	NA	NA
rs12686377	3185498	SLC31A2	SBP_meta_BF05/DBP_meta_BF05/HTN_meta_BF05	chr9	116004033	cis	0.667	0.587	NA	NA	NA
rs12691667	2508611	ARHGAP15	DBP_meta_BF05	chr2	143872693	cis	0.105	0.0617	NA	NA	NA
rs12693607	2520533	OBFC2A	DBP_meta_BF05	chr2	192515552	cis	0.483	0.37	NA	NA	NA
rs12701433	2491745	GNLY	SBP_meta_BF05	chr7	35533096	trans	0.135	0.301	NA	NA	NA
rs12714143	2491745	GNLY	SBP_meta_BF05	chr2	85744885	cis	0.667	0.121	NA	NA	NA
rs12714147	2491745	GNLY	SBP_meta_BF05	chr2	85813834	cis	0.408	0.414	NA	NA	NA
rs12714149	2491745	GNLY	SBP_meta_BF05	chr2	85898898	cis	0.618	0.238	NA	NA	NA
rs12714150	2491745	GNLY	SBP_meta_BF05	chr2	85932089	cis	0.818	0.991	NA	NA	NA
rs12714151	2491745	GNLY	SBP_meta_BF05	chr2	85932210	cis	0.815	0.997	NA	NA	NA
rs12714592	3174816	ANXA1	DBP_meta_BF05	chr3	84387950	trans	0.0235	0.29	NA	NA	NA
rs12718598	3550077	GLRX5	SBP_meta_BF05	chr7	50428445	trans	0.0706	0.793	NA	NA	NA
rs12720541	2448382	PTGS2	DBP_meta_BF05	chr1	186870072	cis	0.808	0.526	NA	NA	NA
rs12720544	2448382	PTGS2	DBP_meta_BF05	chr1	186875489	cis	NA	NA	NA	NA	NA
rs12720557	2448382	PTGS2	DBP_meta_BF05	chr1	186877930	cis	0.833	0.554	NA	NA	NA
rs12720662	2448382	PTGS2	DBP_meta_BF05	chr1	186934092	cis	0.955	0.607	NA	NA	NA
rs12720684	2448382	PTGS2	DBP_meta_BF05	chr1	186946369	cis	0.515	0.948	NA	NA	NA
rs12720691	2448382	PTGS2	DBP_meta_BF05	chr1	186948448	cis	NA	NA	NA	NA	NA
rs12720702	2448382	PTGS2	DBP_meta_BF05	chr1	186955782	cis	0.469	0.798	NA	NA	NA
rs12723616	2435383	S100A10	DBP_meta_BF05	chr1	151865853	cis	0.949	0.592	NA	NA	NA
rs12731593	3550077	GLRX5	SBP_meta_BF05	chr1	118141340	trans	0.439	0.451	NA	NA	NA
rs12746284	2448382	PTGS2	DBP_meta_BF05	chr1	186965414	cis	0.637	0.835	NA	NA	NA
rs12757858	2448382	PTGS2	DBP_meta_BF05	chr1	186774893	cis	0.916	0.261	NA	NA	NA
rs12761066	2448382	PTGS2	DBP_meta_BF05	chr10	83121418	trans	0.761	0.81	NA	NA	NA
rs1276709	3236958	VIM	DBP_meta_BF05	chr10	17038138	cis	0.00176	0.0207	NA	NA	NA
rs12770606	3236958	VIM	DBP_meta_BF05	chr10	17188184	cis	0.518	0.914	NA	NA	NA
rs12783403	3594825	PIGB	SBP_meta_BF05	chr10	29125050	trans	0.191	0.379	NA	NA	NA
rs12814690	3550077	GLRX5	SBP_meta_BF05	chr12	17608549	trans	0.366	0.845	NA	NA	NA
rs12845	2491745	GNLY	SBP_meta_BF05	chr2	85925848	cis	0.434	0.093	NA	NA	NA
rs12865097	3293435	PRF1	SBP_meta_BF05/DBP_meta_BF05	chr13	45477410	trans	0.75	0.717	NA	NA	NA
rs12878495	3558375	GZMB	HTN_meta_BF05	chr14	25230477	cis	0.547	0.852	NA	NA	NA
rs12878578	3558375	GZMB	HTN_meta_BF05	chr14	25045589	cis	0.886	0.674	NA	NA	NA
rs12878705	3550077	GLRX5	SBP_meta_BF05	chr14	96111888	cis	0.0296	0.0869	NA	NA	NA
rs12878813	3550077	GLRX5	SBP_meta_BF05	chr14	96061964	cis	0.159	0.0967	NA	NA	NA
rs12878850	3558375	GZMB	HTN_meta_BF05	chr14	25130692	cis	0.549	0.201	NA	NA	NA
rs12878957	3558375	GZMB	HTN_meta_BF05	chr14	24945136	cis	0.448	0.621	NA	NA	NA
rs12879077	3558375	GZMB	HTN_meta_BF05	chr14	25292081	cis	0.396	0.109	NA	NA	NA
rs12879135	3550077	GLRX5	SBP_meta_BF05	chr14	96062023	cis	0.0228	0.0206	NA	NA	NA
rs12879771	3558375	GZMB	HTN_meta_BF05	chr14	25167511	cis	0.497	0.845	NA	NA	NA
rs12880195	3550077	GLRX5	SBP_meta_BF05	chr14	96062079	cis	0.0239	0.0206	NA	NA	NA
rs12881201	3558375	GZMB	HTN_meta_BF05	chr14	25273437	cis	0.466	0.167	NA	NA	NA
rs12881650	2491745	GNLY	SBP_meta_BF05	chr14	70735534	trans	0.147	0.225	NA	NA	NA
rs12881650	3959986	IL2RB	DBP_meta_BF05	chr14	70735534	trans	0.147	0.225	NA	NA	NA
rs12881813	3558375	GZMB	HTN_meta_BF05	chr14	25243282	cis	0.387	0.71	NA	NA	NA
rs12883514	3550077	GLRX5	SBP_meta_BF05	chr14	96082334	cis	0.689	0.346	NA	NA	NA
rs12884530	3558375	GZMB	HTN_meta_BF05	chr14	25130478	cis	0.547	0.201	NA	NA	NA
rs12884621	3550077	GLRX5	SBP_meta_BF05	chr14	96063177	cis	0.022	0.0208	NA	NA	NA
rs12887898	3558375	GZMB	HTN_meta_BF05	chr14	25126590	cis	0.495	0.203	NA	NA	NA
rs12888413	3558375	GZMB	HTN_meta_BF05	chr14	25231406	cis	0.543	0.862	NA	NA	NA
rs12888641	3558375	GZMB	HTN_meta_BF05	chr14	24943620	cis	0.435	0.614	NA	NA	NA
rs12889156	3550077	GLRX5	SBP_meta_BF05	chr14	96076372	cis	0.72	0.397	NA	NA	NA
rs12890839	2491745	GNLY	SBP_meta_BF05	chr14	87736876	trans	0.548	0.668	NA	NA	NA
rs12890982	2491745	GNLY	SBP_meta_BF05	chr14	87736898	trans	0.546	0.667	NA	NA	NA
rs12892636	2491745	GNLY	SBP_meta_BF05	chr14	70737331	trans	0.149	0.224	NA	NA	NA
rs12892636	3959986	IL2RB	DBP_meta_BF05	chr14	70737331	trans	0.149	0.224	NA	NA	NA
rs12892811	2491745	GNLY	SBP_meta_BF05	chr14	70737456	trans	0.153	0.227	NA	NA	NA
rs12892811	3959986	IL2RB	DBP_meta_BF05	chr14	70737456	trans	0.153	0.227	NA	NA	NA
rs12894593	3550077	GLRX5	SBP_meta_BF05	chr14	96060988	cis	0.47	0.152	NA	NA	NA
rs12894598	3550077	GLRX5	SBP_meta_BF05	chr14	96061693	cis	0.0328	0.0134	NA	NA	NA
rs12894626	3558375	GZMB	HTN_meta_BF05	chr14	25219536	cis	0.408	0.663	NA	NA	NA
rs12895103	3558375	GZMB	HTN_meta_BF05	chr14	24932563	cis	0.529	0.765	NA	NA	NA
rs12895778	3550077	GLRX5	SBP_meta_BF05	chr14	96061668	cis	0.0576	0.0333	NA	NA	NA
rs12896130	3558375	GZMB	HTN_meta_BF05	chr14	25075182	cis	0.792	0.575	NA	NA	NA
rs12896259	3558375	GZMB	HTN_meta_BF05	chr14	24932570	cis	0.401	0.552	NA	NA	NA
rs12902710	3594825	PIGB	SBP_meta_BF05	chr15	55611126	cis	0.34	0.365	NA	NA	NA
rs12907505	3959986	IL2RB	DBP_meta_BF05	chr15	70737689	trans	0.96	0.807	NA	NA	NA
rs12936668	3733275	KCNJ2	HTN_meta_BF05/DBP_meta_BF05	chr17	68147056	cis	0.554	0.222	NA	NA	NA
rs12943869	3733275	KCNJ2	HTN_meta_BF05/DBP_meta_BF05	chr17	68120806	cis	0.399	0.829	NA	NA	NA
rs12945558	3733275	KCNJ2	HTN_meta_BF05/DBP_meta_BF05	chr17	68147069	cis	0.336	0.391	NA	NA	NA
rs12951010	3733275	KCNJ2	HTN_meta_BF05/DBP_meta_BF05	chr17	68149723	cis	0.248	0.358	NA	NA	NA
rs12976023	3830002	GRAMD1A	SBP_meta_BF05/DBP_meta_BF05	chr19	35451396	cis	0.586	0.526	NA	NA	NA
rs12976589	3838004	PPP1R15A	SBP_meta_BF05	chr19	49353480	cis	0.635	0.71	NA	NA	NA
rs12978229	3862108	CLC	DBP_meta_BF05	chr19	40177221	cis	0.774	0.779	NA	NA	NA
rs12982	3185498	SLC31A2	SBP_meta_BF05/DBP_meta_BF05/HTN_meta_BF05	chr9	115925998	cis	0.382	0.473	NA	NA	NA
rs12983461	3868998	NKG7	SBP_meta_BF05	chr19	51880341	cis	0.725	0.717	NA	NA	NA
rs12983952	3822657	CD97	SBP_meta_BF05/DBP_meta_BF05	chr19	14376246	cis	0.845	0.768	NA	NA	NA
rs12984344	3822657	CD97	SBP_meta_BF05/DBP_meta_BF05	chr19	14383070	cis	0.386	0.569	NA	NA	NA
rs12985380	3868998	NKG7	SBP_meta_BF05	chr19	51861176	cis	0.142	0.182	NA	NA	NA
rs12987047	2508611	ARHGAP15	DBP_meta_BF05	chr2	143961414	cis	0.913	0.49	NA	NA	NA
rs12988350	2520533	OBFC2A	DBP_meta_BF05	chr2	192520676	cis	0.663	0.654	NA	NA	NA
rs12989528	2491745	GNLY	SBP_meta_BF05	chr2	85911677	cis	0.74	0.274	NA	NA	NA
rs12993643	2508611	ARHGAP15	DBP_meta_BF05	chr2	144032962	cis	0.608	0.297	NA	NA	NA
rs12994163	2491745	GNLY	SBP_meta_BF05	chr2	85741613	cis	0.863	0.21	NA	NA	NA
rs12994310	2508611	ARHGAP15	DBP_meta_BF05	chr2	143962477	cis	0.412	0.174	NA	NA	NA
rs12995863	2508611	ARHGAP15	DBP_meta_BF05	chr2	143923917	cis	NA	NA	NA	NA	NA
rs12996017	2520533	OBFC2A	DBP_meta_BF05	chr2	192561207	cis	0.659	0.55	NA	NA	NA
rs12996808	2520533	OBFC2A	DBP_meta_BF05	chr2	192529547	cis	0.776	0.883	NA	NA	NA
rs12998188	2761837	FGFBP2	SBP_meta_BF05	chr2	175102666	trans	0.121	0.592	NA	NA	NA
rs12999294	2761837	FGFBP2	SBP_meta_BF05	chr2	175093978	trans	0.215	0.792	NA	NA	NA
rs13001483	2508611	ARHGAP15	DBP_meta_BF05	chr2	144028568	cis	0.902	0.478	NA	NA	NA
rs13002054	2761837	FGFBP2	SBP_meta_BF05	chr2	175054473	trans	0.102	0.513	NA	NA	NA
rs13002152	2520533	OBFC2A	DBP_meta_BF05	chr2	192589985	cis	0.903	0.839	NA	NA	NA
rs13002158	2508611	ARHGAP15	DBP_meta_BF05	chr2	144021712	cis	0.904	0.472	NA	NA	NA
rs13003315	2508611	ARHGAP15	DBP_meta_BF05	chr2	144292773	cis	0.685	0.415	NA	NA	NA
rs13004383	2508611	ARHGAP15	DBP_meta_BF05	chr2	143981603	cis	0.89	0.522	NA	NA	NA
rs13005305	2761837	FGFBP2	SBP_meta_BF05	chr2	174941600	trans	0.0856	0.438	NA	NA	NA
rs13007794	2508611	ARHGAP15	DBP_meta_BF05	chr2	143781309	cis	0.205	0.15	NA	NA	NA
rs13008196	2761837	FGFBP2	SBP_meta_BF05	chr2	175054974	trans	0.102	0.512	NA	NA	NA
rs13008636	2508611	ARHGAP15	DBP_meta_BF05	chr2	143781731	cis	0.0708	0.0254	NA	NA	NA
rs13008966	2508611	ARHGAP15	DBP_meta_BF05	chr2	144117605	cis	0.666	0.344	NA	NA	NA
rs13010737	2508611	ARHGAP15	DBP_meta_BF05	chr2	144200043	cis	0.975	0.299	NA	NA	NA
rs13010841	2520533	OBFC2A	DBP_meta_BF05	chr2	192584436	cis	0.771	0.688	NA	NA	NA
rs13013264	2520533	OBFC2A	DBP_meta_BF05	chr2	192521279	cis	0.46	0.344	NA	NA	NA
rs13013800	2520533	OBFC2A	DBP_meta_BF05	chr2	192450588	cis	0.949	0.535	NA	NA	NA
rs13014588	2491745	GNLY	SBP_meta_BF05	chr2	85950232	cis	0.441	0.689	NA	NA	NA
rs13019401	2761837	FGFBP2	SBP_meta_BF05	chr2	175017665	trans	0.0916	0.498	NA	NA	NA
rs13019434	2508611	ARHGAP15	DBP_meta_BF05	chr2	143860403	cis	0.513	0.362	NA	NA	NA
rs13019672	2520533	OBFC2A	DBP_meta_BF05	chr2	192521913	cis	0.466	0.958	NA	NA	NA
rs13019710	2520533	OBFC2A	DBP_meta_BF05	chr2	192521983	cis	0.463	0.955	NA	NA	NA
rs13021818	2520533	OBFC2A	DBP_meta_BF05	chr2	192516980	cis	0.794	0.573	NA	NA	NA
rs13022541	2508611	ARHGAP15	DBP_meta_BF05	chr2	144015093	cis	0.742	0.553	NA	NA	NA
rs13023766	2520533	OBFC2A	DBP_meta_BF05	chr2	192534895	cis	0.626	0.523	NA	NA	NA
rs13024113	2508611	ARHGAP15	DBP_meta_BF05	chr2	143711005	cis	0.334	0.476	NA	NA	NA
rs13024881	2508611	ARHGAP15	DBP_meta_BF05	chr2	144003002	cis	0.798	0.939	NA	NA	NA
rs13025486	2508611	ARHGAP15	DBP_meta_BF05	chr2	144012499	cis	0.509	0.187	NA	NA	NA
rs13025980	2508611	ARHGAP15	DBP_meta_BF05	chr2	143945796	cis	0.928	0.484	NA	NA	NA
rs13028667	2508611	ARHGAP15	DBP_meta_BF05	chr2	143942863	cis	0.934	0.484	NA	NA	NA
rs13030230	2491745	GNLY	SBP_meta_BF05	chr2	85953030	cis	0.54	0.604	NA	NA	NA
rs13032052	2508611	ARHGAP15	DBP_meta_BF05	chr2	143976480	cis	0.999	0.411	NA	NA	NA
rs13032320	2508611	ARHGAP15	DBP_meta_BF05	chr2	143955490	cis	0.943	0.481	NA	NA	NA
rs13035017	2508611	ARHGAP15	DBP_meta_BF05	chr2	143999479	cis	0.931	0.403	NA	NA	NA
rs13035710	2520533	OBFC2A	DBP_meta_BF05	chr2	192539951	cis	0.833	0.658	NA	NA	NA
rs13036134	2508611	ARHGAP15	DBP_meta_BF05	chr2	143290897	cis	0.642	0.644	NA	NA	NA
rs13052	2439842	TAGLN2	SBP_meta_BF05	chr1	159897126	cis	0.807	0.805	NA	NA	NA
rs13061724	2608725	BHLHE40	SBP_meta_BF05/DBP_meta_BF05	chr3	5002522	cis	0.717	0.494	NA	NA	NA
rs13070271	2649113	TIPARP	SBP_meta_BF05/DBP_meta_BF05	chr3	156577669	cis	0.997	0.881	NA	NA	NA
rs13070816	3236958	VIM	DBP_meta_BF05	chr3	122234028	trans	0.334	0.546	NA	NA	NA
rs13097822	2611779	TMEM43	SBP_meta_BF05	chr3	13969396	cis	0.494	0.356	NA	NA	NA
rs13101170	2608725	BHLHE40	SBP_meta_BF05/DBP_meta_BF05	chr3	5043907	cis	0.568	0.929	NA	NA	NA
rs13102822	2761734	FBXL5	DBP_meta_BF05	chr4	15388377	cis	0.935	0.362	NA	NA	NA
rs13103161	2774971	ANTXR2	DBP_meta_BF05	chr4	106216459	trans	0.706	0.0817	NA	NA	NA
rs13104011	2761734	FBXL5	DBP_meta_BF05	chr4	15807033	cis	0.314	0.293	NA	NA	NA
rs13104095	2761734	FBXL5	DBP_meta_BF05	chr4	15446011	cis	0.109	0.0813	NA	NA	NA
rs13106528	2761734	FBXL5	DBP_meta_BF05	chr4	15654086	cis	0.322	0.0505	NA	NA	NA
rs13106702	2761734	FBXL5	DBP_meta_BF05	chr4	15397450	cis	0.173	0.229	NA	NA	NA
rs13107837	2761837	FGFBP2	SBP_meta_BF05	chr4	16036112	cis	0.869	0.523	NA	NA	NA
rs13107909	2774971	ANTXR2	DBP_meta_BF05	chr4	80816350	cis	0.947	0.571	NA	NA	NA
rs13108125	2761734	FBXL5	DBP_meta_BF05	chr4	15443685	cis	0.837	0.712	NA	NA	NA
rs13110584	2774971	ANTXR2	DBP_meta_BF05	chr4	80972143	cis	0.73	0.909	NA	NA	NA
rs13110629	2774971	ANTXR2	DBP_meta_BF05	chr4	80703297	cis	0.592	0.935	NA	NA	NA
rs13113022	2761734	FBXL5	DBP_meta_BF05	chr4	15376647	cis	0.629	0.773	NA	NA	NA
rs13114920	2761734	FBXL5	DBP_meta_BF05	chr4	15435274	cis	0.943	0.887	NA	NA	NA
rs13116304	2761734	FBXL5	DBP_meta_BF05	chr4	15569146	cis	0.349	0.158	NA	NA	NA
rs13117333	2761837	FGFBP2	SBP_meta_BF05	chr4	16039966	cis	0.921	0.635	NA	NA	NA
rs13120356	2761734	FBXL5	DBP_meta_BF05	chr4	15767122	cis	0.537	0.685	NA	NA	NA
rs13122790	2761734	FBXL5	DBP_meta_BF05	chr4	15356795	cis	0.85	0.359	NA	NA	NA
rs13123050	2761734	FBXL5	DBP_meta_BF05	chr4	15460758	cis	0.634	0.34	NA	NA	NA
rs13123785	2761734	FBXL5	DBP_meta_BF05	chr4	15431029	cis	0.166	0.111	NA	NA	NA
rs13126210	2774971	ANTXR2	DBP_meta_BF05	chr4	80749065	cis	0.81	0.862	NA	NA	NA
rs13128332	2761837	FGFBP2	SBP_meta_BF05	chr4	16035604	cis	0.836	0.501	NA	NA	NA
rs13129224	2774971	ANTXR2	DBP_meta_BF05	chr4	80796673	cis	0.833	0.775	NA	NA	NA
rs13131119	2761734	FBXL5	DBP_meta_BF05	chr4	15522282	cis	0.759	0.398	NA	NA	NA
rs13131199	2761734	FBXL5	DBP_meta_BF05	chr4	15515050	cis	0.13	0.275	NA	NA	NA
rs13131227	2761734	FBXL5	DBP_meta_BF05	chr4	15421953	cis	0.713	0.483	NA	NA	NA
rs13131700	2761734	FBXL5	DBP_meta_BF05	chr4	15485238	cis	0.233	0.157	NA	NA	NA
rs13131702	2761734	FBXL5	DBP_meta_BF05	chr4	15392125	cis	0.933	0.36	NA	NA	NA
rs13132007	2761734	FBXL5	DBP_meta_BF05	chr4	15405373	cis	0.0767	0.13	NA	NA	NA
rs13132446	2761734	FBXL5	DBP_meta_BF05	chr4	15405543	cis	0.0757	0.127	NA	NA	NA
rs13132604	2761734	FBXL5	DBP_meta_BF05	chr4	15422545	cis	0.0757	0.122	NA	NA	NA
rs13132613	2774971	ANTXR2	DBP_meta_BF05	chr4	80661721	cis	0.71	0.99	NA	NA	NA
rs13132762	2761734	FBXL5	DBP_meta_BF05	chr4	15425452	cis	0.074	0.0471	NA	NA	NA
rs13132967	2774971	ANTXR2	DBP_meta_BF05	chr4	80968006	cis	0.306	0.558	NA	NA	NA
rs13133213	2761734	FBXL5	DBP_meta_BF05	chr4	15646794	cis	0.268	0.0426	NA	NA	NA
rs13136498	2761734	FBXL5	DBP_meta_BF05	chr4	15823964	cis	0.338	0.309	NA	NA	NA
rs13137175	2761837	FGFBP2	SBP_meta_BF05	chr4	16057694	cis	0.294	0.786	NA	NA	NA
rs13137905	2761734	FBXL5	DBP_meta_BF05	chr4	15375668	cis	0.903	0.356	NA	NA	NA
rs13138481	2761734	FBXL5	DBP_meta_BF05	chr4	15423018	cis	0.0803	0.131	NA	NA	NA
rs13139590	2761734	FBXL5	DBP_meta_BF05	chr4	15376654	cis	0.633	0.773	NA	NA	NA
rs13140264	2761837	FGFBP2	SBP_meta_BF05	chr4	16043472	cis	0.843	0.652	NA	NA	NA
rs13141201	2774971	ANTXR2	DBP_meta_BF05	chr4	80751289	cis	0.801	0.865	NA	NA	NA
rs13141429	2761837	FGFBP2	SBP_meta_BF05	chr4	16003151	cis	NA	NA	NA	NA	NA
rs13141724	2761734	FBXL5	DBP_meta_BF05	chr4	15577292	cis	0.297	0.0413	NA	NA	NA
rs13143194	2761837	FGFBP2	SBP_meta_BF05	chr4	15952800	cis	0.586	0.82	NA	NA	NA
rs13144428	2761734	FBXL5	DBP_meta_BF05	chr4	15557442	cis	0.296	0.0441	NA	NA	NA
rs13146131	2774971	ANTXR2	DBP_meta_BF05	chr4	80633295	cis	0.544	0.619	NA	NA	NA
rs13146941	2761734	FBXL5	DBP_meta_BF05	chr4	15387255	cis	0.931	0.353	NA	NA	NA
rs13147551	2761734	FBXL5	DBP_meta_BF05	chr4	15812877	cis	0.321	0.269	NA	NA	NA
rs13147821	2774971	ANTXR2	DBP_meta_BF05	chr4	80671379	cis	0.743	0.911	NA	NA	NA
rs13148924	2761734	FBXL5	DBP_meta_BF05	chr4	15740745	cis	0.365	0.056	NA	NA	NA
rs13149679	2761734	FBXL5	DBP_meta_BF05	chr4	15430571	cis	0.117	0.0579	NA	NA	NA
rs13150862	2761734	FBXL5	DBP_meta_BF05	chr4	15420372	cis	0.0825	0.0464	NA	NA	NA
rs13152775	2761734	FBXL5	DBP_meta_BF05	chr4	15427831	cis	0.0964	0.0573	NA	NA	NA
rs13159921	2448382	PTGS2	DBP_meta_BF05	chr5	24484030	trans	0.426	0.665	NA	NA	NA
rs1316320	2520533	OBFC2A	DBP_meta_BF05	chr2	192395441	cis	0.978	0.752	NA	NA	NA
rs13169155	2883349	HAVCR2	DBP_meta_BF05	chr5	156426663	cis	0.432	0.52	NA	NA	NA
rs13169465	2883349	HAVCR2	DBP_meta_BF05	chr5	156426916	cis	0.433	0.519	NA	NA	NA
rs13169621	2883349	HAVCR2	DBP_meta_BF05	chr5	156426974	cis	0.419	0.519	NA	NA	NA
rs13170779	2887309	DUSP1	SBP_meta_BF05	chr5	172201901	cis	0.307	0.0932	NA	NA	NA
rs13181803	2883349	HAVCR2	DBP_meta_BF05	chr5	156429177	cis	0.438	0.52	NA	NA	NA
rs13191508	2448382	PTGS2	DBP_meta_BF05	chr6	14078745	trans	0.954	0.45	NA	NA	NA
rs1320566	2439842	TAGLN2	SBP_meta_BF05	chr1	159903634	cis	0.893	0.674	NA	NA	NA
rs1320568	2439842	TAGLN2	SBP_meta_BF05	chr1	159912346	cis	0.916	0.742	NA	NA	NA
rs13208593	2448382	PTGS2	DBP_meta_BF05	chr6	14104885	trans	0.878	0.4	NA	NA	NA
rs1323466	3185498	SLC31A2	SBP_meta_BF05/DBP_meta_BF05/HTN_meta_BF05	chr9	116083248	cis	0.709	0.149	NA	NA	NA
rs13256023	3174816	ANXA1	DBP_meta_BF05	chr8	61648551	trans	0.972	0.772	NA	NA	NA
rs13281002	3841076	MYADM	SBP_meta_BF05/DBP_meta_BF05/HTN_meta_BF05	chr8	66573447	trans	0.226	0.0901	NA	NA	NA
rs13284739	3174816	ANXA1	DBP_meta_BF05	chr9	75708486	cis	0.863	0.987	NA	NA	NA
rs13287463	3174816	ANXA1	DBP_meta_BF05	chr9	75117399	cis	0.48	0.823	NA	NA	NA
rs13288872	3174816	ANXA1	DBP_meta_BF05	chr9	75823157	cis	0.922	0.849	NA	NA	NA
rs13290663	3174816	ANXA1	DBP_meta_BF05	chr9	75819755	cis	0.942	0.861	NA	NA	NA
rs13291234	3174816	ANXA1	DBP_meta_BF05	chr9	75872143	cis	0.413	0.369	NA	NA	NA
rs13293298	3174816	ANXA1	DBP_meta_BF05	chr9	75787104	cis	NA	NA	NA	NA	NA
rs13293746	3174816	ANXA1	DBP_meta_BF05	chr9	75778238	cis	0.978	0.964	NA	NA	NA
rs13294922	3185498	SLC31A2	SBP_meta_BF05/DBP_meta_BF05/HTN_meta_BF05	chr9	115864525	cis	0.798	0.726	NA	NA	NA
rs13346288	3236958	VIM	DBP_meta_BF05	chr19	3693676	trans	0.898	0.195	NA	NA	NA
rs1335378	3174816	ANXA1	DBP_meta_BF05	chr9	75915944	cis	0.684	0.442	NA	NA	NA
rs1335379	3174816	ANXA1	DBP_meta_BF05	chr9	75917113	cis	0.73	0.415	NA	NA	NA
rs1335380	3174816	ANXA1	DBP_meta_BF05	chr9	76030814	cis	0.997	0.314	NA	NA	NA
rs1335385	3174816	ANXA1	DBP_meta_BF05	chr9	76017507	cis	0.458	0.209	NA	NA	NA
rs1335387	3174816	ANXA1	DBP_meta_BF05	chr9	75974289	cis	0.884	0.102	NA	NA	NA
rs1335388	3174816	ANXA1	DBP_meta_BF05	chr9	75973730	cis	0.637	0.776	NA	NA	NA
rs13360569	2883349	HAVCR2	DBP_meta_BF05	chr5	156422887	cis	0.894	0.68	NA	NA	NA
rs13373821	3185498	SLC31A2	SBP_meta_BF05/DBP_meta_BF05/HTN_meta_BF05	chr1	233935785	trans	0.101	0.177	NA	NA	NA
rs13375339	2448382	PTGS2	DBP_meta_BF05	chr1	186768311	cis	0.974	0.683	NA	NA	NA
rs13387566	2508611	ARHGAP15	DBP_meta_BF05	chr2	143862401	cis	0.166	0.13	NA	NA	NA
rs13388432	2508611	ARHGAP15	DBP_meta_BF05	chr2	144276344	cis	0.864	0.62	NA	NA	NA
rs13389286	2508611	ARHGAP15	DBP_meta_BF05	chr2	144364876	cis	0.512	0.442	NA	NA	NA
rs13389806	2491745	GNLY	SBP_meta_BF05	chr2	85948439	cis	0.0692	0.000735	NA	NA	NA
rs13389847	2491745	GNLY	SBP_meta_BF05	chr2	85939478	cis	0.488	0.0733	NA	NA	NA
rs13394092	2491745	GNLY	SBP_meta_BF05	chr2	85815954	cis	0.51	0.351	NA	NA	NA
rs13395555	2491745	GNLY	SBP_meta_BF05	chr2	85976236	cis	0.471	0.216	NA	NA	NA
rs13400884	2491745	GNLY	SBP_meta_BF05	chr2	86039821	cis	0.933	0.726	NA	NA	NA
rs13414982	2491745	GNLY	SBP_meta_BF05	chr2	85881464	cis	0.593	0.931	NA	NA	NA
rs1342014	3174816	ANXA1	DBP_meta_BF05	chr9	75731311	cis	0.708	0.832	NA	NA	NA
rs1342017	3174816	ANXA1	DBP_meta_BF05	chr9	75782510	cis	0.976	0.738	NA	NA	NA
rs1342018	3174816	ANXA1	DBP_meta_BF05	chr9	75782131	cis	0.834	0.838	NA	NA	NA
rs13420256	2491745	GNLY	SBP_meta_BF05	chr2	85731890	cis	0.752	0.144	NA	NA	NA
rs13430960	2508611	ARHGAP15	DBP_meta_BF05	chr2	144409949	cis	0.0691	0.0555	NA	NA	NA
rs13430978	2491745	GNLY	SBP_meta_BF05	chr2	85970703	cis	0.541	0.83	NA	NA	NA
rs13431159	2491745	GNLY	SBP_meta_BF05	chr2	85815651	cis	0.492	0.356	NA	NA	NA
rs1343763	2508611	ARHGAP15	DBP_meta_BF05	chr2	144118752	cis	0.789	0.302	NA	NA	NA
rs1347135	2608725	BHLHE40	SBP_meta_BF05/DBP_meta_BF05	chr5	167484417	trans	0.331	0.0558	NA	NA	NA
rs1347136	2608725	BHLHE40	SBP_meta_BF05/DBP_meta_BF05	chr5	167484447	trans	0.42	0.0956	NA	NA	NA
rs1347690	2491745	GNLY	SBP_meta_BF05	chr2	85958317	cis	0.178	0.0817	NA	NA	NA
rs1348818	2491745	GNLY	SBP_meta_BF05	chr2	85807082	cis	0.965	0.951	NA	NA	NA
rs1352654	2435383	S100A10	DBP_meta_BF05	chr1	151861477	cis	0.912	0.618	NA	NA	NA
rs1353590	3174816	ANXA1	DBP_meta_BF05	chr9	76131411	cis	0.674	0.331	NA	NA	NA
rs1354163	2883349	HAVCR2	DBP_meta_BF05	chr5	156420703	cis	0.407	0.17	NA	NA	NA
rs1356621	2491745	GNLY	SBP_meta_BF05	chr2	85973114	cis	0.0985	0.174	NA	NA	NA
rs1356622	2491745	GNLY	SBP_meta_BF05	chr2	85973016	cis	0.0913	0.163	NA	NA	NA
rs1356623	2491745	GNLY	SBP_meta_BF05	chr2	85972920	cis	0.0824	0.153	NA	NA	NA
rs1356624	2491745	GNLY	SBP_meta_BF05	chr2	85972895	cis	0.086	0.138	NA	NA	NA
rs1370542	2491745	GNLY	SBP_meta_BF05	chr2	85944155	cis	0.86	0.671	NA	NA	NA
rs1371514	2508611	ARHGAP15	DBP_meta_BF05	chr2	143749073	cis	0.492	0.256	NA	NA	NA
rs1371516	2508611	ARHGAP15	DBP_meta_BF05	chr2	143748793	cis	0.421	0.314	NA	NA	NA
rs1375493	3174816	ANXA1	DBP_meta_BF05	chr2	182323766	trans	0.401	0.976	NA	NA	NA
rs1376041	3662808	GPR56	SBP_meta_BF05/DBP_meta_BF05	chr16	57689883	cis	0.473	0.277	NA	NA	NA
rs1376749	2508611	ARHGAP15	DBP_meta_BF05	chr2	143967392	cis	0.901	0.483	NA	NA	NA
rs1376750	2508611	ARHGAP15	DBP_meta_BF05	chr2	143967920	cis	0.945	0.393	NA	NA	NA
rs1381317	3558375	GZMB	HTN_meta_BF05	chr14	25218082	cis	0.264	0.925	NA	NA	NA
rs1381320	3558375	GZMB	HTN_meta_BF05	chr14	25245074	cis	0.4	0.953	NA	NA	NA
rs1385396	2491745	GNLY	SBP_meta_BF05	chr14	87739750	trans	0.535	0.636	NA	NA	NA
rs1387834	2435383	S100A10	DBP_meta_BF05	chr1	151955052	cis	0.924	0.782	NA	NA	NA
rs1387835	2435383	S100A10	DBP_meta_BF05	chr1	151954892	cis	0.954	0.811	NA	NA	NA
rs1388173	2508611	ARHGAP15	DBP_meta_BF05	chr2	143607215	cis	0.192	0.00871	NA	NA	NA
rs1390945	3174816	ANXA1	DBP_meta_BF05	chr9	76147831	cis	0.888	0.466	NA	NA	NA
rs1390946	3174816	ANXA1	DBP_meta_BF05	chr9	76185588	cis	0.871	0.499	NA	NA	NA
rs1390947	3174816	ANXA1	DBP_meta_BF05	chr9	76125591	cis	0.418	0.301	NA	NA	NA
rs1390948	3174816	ANXA1	DBP_meta_BF05	chr9	76045263	cis	0.908	0.507	NA	NA	NA
rs1392896	2761837	FGFBP2	SBP_meta_BF05	chr4	16492812	cis	0.395	0.996	NA	NA	NA
rs1393208	2883349	HAVCR2	DBP_meta_BF05	chr5	156477725	cis	0.391	0.157	NA	NA	NA
rs1393209	2883349	HAVCR2	DBP_meta_BF05	chr5	156477540	cis	0.428	0.172	NA	NA	NA
rs1398199	3959986	IL2RB	DBP_meta_BF05	chr15	70732719	trans	0.959	0.717	NA	NA	NA
rs1400770	2761837	FGFBP2	SBP_meta_BF05	chr4	16034525	cis	0.827	0.496	NA	NA	NA
rs1400772	2761837	FGFBP2	SBP_meta_BF05	chr4	16038342	cis	0.933	0.587	NA	NA	NA
rs1400773	2761837	FGFBP2	SBP_meta_BF05	chr4	16038800	cis	0.918	0.691	NA	NA	NA
rs1406384	3375735	AHNAK	SBP_meta_BF05	chr11	62083530	cis	0.765	0.168	NA	NA	NA
rs14076	3558375	GZMB	HTN_meta_BF05	chr14	24888335	cis	0.917	0.383	NA	NA	NA
rs1414163	3174816	ANXA1	DBP_meta_BF05	chr9	76018090	cis	0.984	0.907	NA	NA	NA
rs1414165	3174816	ANXA1	DBP_meta_BF05	chr9	75975477	cis	0.64	0.747	NA	NA	NA
rs1414166	3174816	ANXA1	DBP_meta_BF05	chr9	75970962	cis	0.406	0.18	NA	NA	NA
rs1414167	3174816	ANXA1	DBP_meta_BF05	chr9	75957727	cis	0.636	0.762	NA	NA	NA
rs1414652	3185498	SLC31A2	SBP_meta_BF05/DBP_meta_BF05/HTN_meta_BF05	chr1	240536161	trans	0.44	0.92	NA	NA	NA
rs1418184	3174816	ANXA1	DBP_meta_BF05	chr9	75761355	cis	0.961	0.999	NA	NA	NA
rs1424483	3174816	ANXA1	DBP_meta_BF05	chr9	75627531	cis	0.582	0.377	NA	NA	NA
rs1431097	2774971	ANTXR2	DBP_meta_BF05	chr7	136982470	trans	0.697	0.782	NA	NA	NA
rs1432622	2448382	PTGS2	DBP_meta_BF05	chr5	148203762	trans	0.902	0.829	NA	NA	NA
rs1432872	2883349	HAVCR2	DBP_meta_BF05	chr5	156543396	cis	0.49	0.177	NA	NA	NA
rs1433357	2611779	TMEM43	SBP_meta_BF05	chr3	13944838	cis	0.535	0.475	NA	NA	NA
rs1433358	2611779	TMEM43	SBP_meta_BF05	chr3	13943862	cis	0.529	0.345	NA	NA	NA
rs1437741	2491745	GNLY	SBP_meta_BF05	chr2	85968579	cis	0.291	0.162	NA	NA	NA
rs1437742	2491745	GNLY	SBP_meta_BF05	chr2	85924899	cis	0.411	0.085	NA	NA	NA
rs1437743	2491745	GNLY	SBP_meta_BF05	chr2	85924989	cis	0.422	0.0922	NA	NA	NA
rs1437744	2491745	GNLY	SBP_meta_BF05	chr2	85925084	cis	0.417	0.0869	NA	NA	NA
rs1437745	2491745	GNLY	SBP_meta_BF05	chr2	85928283	cis	0.439	0.0942	NA	NA	NA
rs1444842	3174816	ANXA1	DBP_meta_BF05	chr9	75263674	cis	0.866	0.427	NA	NA	NA
rs1446669	2491745	GNLY	SBP_meta_BF05	chr2	85762209	cis	0.897	0.176	NA	NA	NA
rs1449263	3174816	ANXA1	DBP_meta_BF05	chr2	182319301	trans	0.356	0.969	NA	NA	NA
rs1459569	3868998	NKG7	SBP_meta_BF05	chr5	100707173	trans	0.137	0.0301	NA	NA	NA
rs1459588	3868998	NKG7	SBP_meta_BF05	chr5	100697323	trans	0.124	0.0388	NA	NA	NA
rs1461638	3558375	GZMB	HTN_meta_BF05	chr14	25236192	cis	0.545	0.902	NA	NA	NA
rs1461640	3558375	GZMB	HTN_meta_BF05	chr14	25235943	cis	0.545	0.899	NA	NA	NA
rs1461645	3558375	GZMB	HTN_meta_BF05	chr14	25294889	cis	0.454	0.117	NA	NA	NA
rs1461648	3558375	GZMB	HTN_meta_BF05	chr14	25210937	cis	0.525	0.787	NA	NA	NA
rs1461650	3558375	GZMB	HTN_meta_BF05	chr14	25213422	cis	0.723	0.724	NA	NA	NA
rs1461651	3558375	GZMB	HTN_meta_BF05	chr14	25214880	cis	0.521	0.928	NA	NA	NA
rs1461652	3558375	GZMB	HTN_meta_BF05	chr14	25214913	cis	0.525	0.927	NA	NA	NA
rs1461653	3558375	GZMB	HTN_meta_BF05	chr14	25215522	cis	0.413	0.651	NA	NA	NA
rs1463109	3558375	GZMB	HTN_meta_BF05	chr4	88714718	trans	0.913	0.451	NA	NA	NA
rs1465823	2491745	GNLY	SBP_meta_BF05	chr2	85976645	cis	0.116	0.162	NA	NA	NA
rs1466035	2491745	GNLY	SBP_meta_BF05	chr2	85675694	cis	0.826	0.916	NA	NA	NA
rs1466132	3662808	GPR56	SBP_meta_BF05/DBP_meta_BF05	chr16	57669942	cis	0.336	0.666	NA	NA	NA
rs1466133	3662808	GPR56	SBP_meta_BF05/DBP_meta_BF05	chr16	57670048	cis	0.289	0.328	NA	NA	NA
rs1466134	3662808	GPR56	SBP_meta_BF05/DBP_meta_BF05	chr16	57670947	cis	0.269	0.211	NA	NA	NA
rs1468472	3733275	KCNJ2	HTN_meta_BF05/DBP_meta_BF05	chr17	68170749	cis	0.0981	0.136	NA	NA	NA
rs1468735	2761734	FBXL5	DBP_meta_BF05	chr4	15564038	cis	0.306	0.0423	NA	NA	NA
rs1468736	2761734	FBXL5	DBP_meta_BF05	chr4	15564099	cis	0.281	0.0372	NA	NA	NA
rs1469167	3174816	ANXA1	DBP_meta_BF05	chr9	75557007	cis	0.223	0.497	NA	NA	NA
rs1473275	2491745	GNLY	SBP_meta_BF05	chr2	85976300	cis	0.108	0.15	NA	NA	NA
rs1473494	2435383	S100A10	DBP_meta_BF05	chr1	151949087	cis	0.959	0.797	NA	NA	NA
rs1474590	2448382	PTGS2	DBP_meta_BF05	chr1	186867549	cis	0.842	0.575	NA	NA	NA
rs1474797	2448382	PTGS2	DBP_meta_BF05	chr1	186967193	cis	0.407	0.96	NA	NA	NA
rs1476591	3236958	VIM	DBP_meta_BF05	chr19	3679607	trans	0.758	0.374	NA	NA	NA
rs1476592	3236958	VIM	DBP_meta_BF05	chr19	3679740	trans	0.798	0.356	NA	NA	NA
rs1478286	3174816	ANXA1	DBP_meta_BF05	chr18	23907348	trans	0.237	0.247	NA	NA	NA
rs1488377	2611779	TMEM43	SBP_meta_BF05	chr3	14073178	cis	0.445	0.489	NA	NA	NA
rs1490187	2435383	S100A10	DBP_meta_BF05	chr1	151844396	cis	0.623	0.811	NA	NA	NA
rs1490191	2435383	S100A10	DBP_meta_BF05	chr1	151916751	cis	0.949	0.85	NA	NA	NA
rs1496037	2435383	S100A10	DBP_meta_BF05	chr1	152062750	cis	0.919	0.912	NA	NA	NA
rs1497026	3174816	ANXA1	DBP_meta_BF05	chr9	76187254	cis	0.814	0.476	NA	NA	NA
rs1497027	3174816	ANXA1	DBP_meta_BF05	chr9	76163354	cis	0.805	0.417	NA	NA	NA
rs1497029	3174816	ANXA1	DBP_meta_BF05	chr9	76116115	cis	0.728	0.371	NA	NA	NA
rs1498401	2491745	GNLY	SBP_meta_BF05	chr1	77895705	trans	0.918	0.398	NA	NA	NA
rs1501909	2883349	HAVCR2	DBP_meta_BF05	chr5	156466179	cis	0.32	0.404	NA	NA	NA
rs1501910	2883349	HAVCR2	DBP_meta_BF05	chr5	156418790	cis	0.367	0.201	NA	NA	NA
rs1510614	2491745	GNLY	SBP_meta_BF05	chr2	54974897	trans	0.595	0.533	NA	NA	NA
rs1512701	3236958	VIM	DBP_meta_BF05	chr10	17023617	cis	0.639	0.208	NA	NA	NA
rs1517598	2761837	FGFBP2	SBP_meta_BF05	chr4	16020664	cis	0.566	0.614	NA	NA	NA
rs1517599	2761837	FGFBP2	SBP_meta_BF05	chr4	16026458	cis	0.924	0.672	NA	NA	NA
rs1517600	2761837	FGFBP2	SBP_meta_BF05	chr4	16026481	cis	0.807	0.797	NA	NA	NA
rs1517912	2508611	ARHGAP15	DBP_meta_BF05	chr2	144429770	cis	0.402	0.275	NA	NA	NA
rs1517914	2508611	ARHGAP15	DBP_meta_BF05	chr2	144400548	cis	0.589	0.298	NA	NA	NA
rs152117	2883349	HAVCR2	DBP_meta_BF05	chr5	156618348	cis	0.282	0.272	NA	NA	NA
rs1528730	3375735	AHNAK	SBP_meta_BF05	chr11	62081181	cis	0.817	0.202	NA	NA	NA
rs1532132	2435383	S100A10	DBP_meta_BF05	chr1	151954140	cis	0.929	0.788	NA	NA	NA
rs1537037	3185498	SLC31A2	SBP_meta_BF05/DBP_meta_BF05/HTN_meta_BF05	chr9	115886755	cis	0.846	0.798	NA	NA	NA
rs1537849	3185498	SLC31A2	SBP_meta_BF05/DBP_meta_BF05/HTN_meta_BF05	chr1	240554447	trans	0.486	0.979	NA	NA	NA
rs1541458	2761837	FGFBP2	SBP_meta_BF05	chr4	15966840	cis	0.907	0.602	NA	NA	NA
rs1543535	3185498	SLC31A2	SBP_meta_BF05/DBP_meta_BF05/HTN_meta_BF05	chr9	116098935	cis	0.826	0.497	NA	NA	NA
rs1545141	2491745	GNLY	SBP_meta_BF05	chr2	85938152	cis	0.856	0.503	NA	NA	NA
rs1546288	2883349	HAVCR2	DBP_meta_BF05	chr5	156430705	cis	0.387	0.357	NA	NA	NA
rs1547074	3550077	GLRX5	SBP_meta_BF05	chr14	96034828	cis	0.645	0.116	NA	NA	NA
rs1552607	2435383	S100A10	DBP_meta_BF05	chr1	151963398	cis	0.913	0.879	NA	NA	NA
rs1553316	2883349	HAVCR2	DBP_meta_BF05	chr5	156479509	cis	0.374	0.139	NA	NA	NA
rs1553319	2883349	HAVCR2	DBP_meta_BF05	chr5	156479001	cis	0.384	0.155	NA	NA	NA
rs1558100	3733275	KCNJ2	HTN_meta_BF05/DBP_meta_BF05	chr17	68152714	cis	0.227	0.421	NA	NA	NA
rs1558198	2761837	FGFBP2	SBP_meta_BF05	chr4	15942832	cis	0.582	0.377	NA	NA	NA
rs1558572	2761734	FBXL5	DBP_meta_BF05	chr4	15538744	cis	0.024	0.12	NA	NA	NA
rs1558798	2435383	S100A10	DBP_meta_BF05	chr3	181466976	trans	0.204	0.806	NA	NA	NA
rs1561198	2491745	GNLY	SBP_meta_BF05	chr2	85809989	cis	0.985	0.952	NA	NA	NA
rs1561283	2491745	GNLY	SBP_meta_BF05	chr2	85965769	cis	0.284	0.178	NA	NA	NA
rs1561284	2491745	GNLY	SBP_meta_BF05	chr2	85924295	cis	0.416	0.087	NA	NA	NA
rs1561285	2491745	GNLY	SBP_meta_BF05	chr2	85924384	cis	0.413	0.0858	NA	NA	NA
rs1561541	2508611	ARHGAP15	DBP_meta_BF05	chr2	143868915	cis	0.465	0.345	NA	NA	NA
rs1563783	3868998	NKG7	SBP_meta_BF05	chr5	100720685	trans	0.187	0.0481	NA	NA	NA
rs1567698	3174816	ANXA1	DBP_meta_BF05	chr9	76100826	cis	0.864	0.382	NA	NA	NA
rs1569479	2448382	PTGS2	DBP_meta_BF05	chr1	186873704	cis	0.816	0.818	NA	NA	NA
rs1569480	2448382	PTGS2	DBP_meta_BF05	chr1	186874461	cis	0.856	0.791	NA	NA	NA
rs1570263	3550077	GLRX5	SBP_meta_BF05	chr14	96080189	cis	0.737	0.397	NA	NA	NA
rs157114	3174816	ANXA1	DBP_meta_BF05	chr9	76187085	cis	0.867	0.992	NA	NA	NA
rs157116	3174816	ANXA1	DBP_meta_BF05	chr9	76186104	cis	0.829	0.715	NA	NA	NA
rs157117	3174816	ANXA1	DBP_meta_BF05	chr9	76184436	cis	0.929	0.912	NA	NA	NA
rs157119	3174816	ANXA1	DBP_meta_BF05	chr9	76182983	cis	0.721	0.638	NA	NA	NA
rs157121	3174816	ANXA1	DBP_meta_BF05	chr9	76181416	cis	0.942	0.901	NA	NA	NA
rs157122	3174816	ANXA1	DBP_meta_BF05	chr9	76180917	cis	0.947	0.906	NA	NA	NA
rs1577289	3733275	KCNJ2	HTN_meta_BF05/DBP_meta_BF05	chr10	19616735	trans	0.574	0.874	NA	NA	NA
rs1579551	2611779	TMEM43	SBP_meta_BF05	chr3	13945571	cis	0.512	0.349	NA	NA	NA
rs1582591	2774971	ANTXR2	DBP_meta_BF05	chr16	58397153	trans	0.565	0.962	NA	NA	NA
rs1591336	3733275	KCNJ2	HTN_meta_BF05/DBP_meta_BF05	chr10	19615732	trans	0.575	0.869	NA	NA	NA
rs1591530	3185498	SLC31A2	SBP_meta_BF05/DBP_meta_BF05/HTN_meta_BF05	chr1	240536571	trans	0.441	0.94	NA	NA	NA
rs1593197	3174816	ANXA1	DBP_meta_BF05	chr9	75633424	cis	0.926	0.483	NA	NA	NA
rs1602245	2435383	S100A10	DBP_meta_BF05	chr1	151941442	cis	0.997	0.849	NA	NA	NA
rs1602248	2435383	S100A10	DBP_meta_BF05	chr1	151941300	cis	0.991	0.849	NA	NA	NA
rs1602254	2435383	S100A10	DBP_meta_BF05	chr1	151980570	cis	0.883	0.489	NA	NA	NA
rs1603520	3174816	ANXA1	DBP_meta_BF05	chr9	76082757	cis	0.777	0.34	NA	NA	NA
rs1609909	3830002	GRAMD1A	SBP_meta_BF05/DBP_meta_BF05	chr19	35477041	cis	0.611	0.178	NA	NA	NA
rs1615475	2491745	GNLY	SBP_meta_BF05	chr14	87737581	trans	0.55	0.666	NA	NA	NA
rs1615552	2491745	GNLY	SBP_meta_BF05	chr14	87737606	trans	0.563	0.68	NA	NA	NA
rs1627787	3550077	GLRX5	SBP_meta_BF05	chr1	118165973	trans	0.361	0.49	NA	NA	NA
rs163310	2883349	HAVCR2	DBP_meta_BF05	chr5	156618003	cis	0.88	0.84	NA	NA	NA
rs163311	2883349	HAVCR2	DBP_meta_BF05	chr5	156617851	cis	0.835	0.704	NA	NA	NA
rs163425	2883349	HAVCR2	DBP_meta_BF05	chr5	156621333	cis	0.289	0.29	NA	NA	NA
rs165528	3236958	VIM	DBP_meta_BF05	chr10	17305282	cis	NA	NA	NA	NA	NA
rs165530	3236958	VIM	DBP_meta_BF05	chr10	17281756	cis	0.142	0.114	NA	NA	NA
rs165531	3236958	VIM	DBP_meta_BF05	chr10	17278171	cis	0.132	0.2	NA	NA	NA
rs165990	2883349	HAVCR2	DBP_meta_BF05	chr5	156582353	cis	0.797	0.458	NA	NA	NA
rs165991	2883349	HAVCR2	DBP_meta_BF05	chr5	156583641	cis	0.973	0.436	NA	NA	NA
rs166767	3174816	ANXA1	DBP_meta_BF05	chr9	76137194	cis	0.937	0.462	NA	NA	NA
rs1675	2982076	TAGAP	HTN_meta_BF05/SBP_meta_BF05	chr18	55761994	trans	0.0844	0.814	NA	NA	NA
rs1676987	3174816	ANXA1	DBP_meta_BF05	chr18	23946463	trans	0.215	0.227	NA	NA	NA
rs1676993	3174816	ANXA1	DBP_meta_BF05	chr18	23933226	trans	0.22	0.23	NA	NA	NA
rs16822399	2508611	ARHGAP15	DBP_meta_BF05	chr2	144126493	cis	0.746	0.152	NA	NA	NA
rs16822403	2508611	ARHGAP15	DBP_meta_BF05	chr2	144128461	cis	0.673	0.132	NA	NA	NA
rs16822986	2508611	ARHGAP15	DBP_meta_BF05	chr2	144503694	cis	0.923	0.823	NA	NA	NA
rs1682540	2491745	GNLY	SBP_meta_BF05	chr14	87740795	trans	0.495	0.571	NA	NA	NA
rs1682548	2491745	GNLY	SBP_meta_BF05	chr14	87738063	trans	0.55	0.667	NA	NA	NA
rs1682549	2491745	GNLY	SBP_meta_BF05	chr14	87737916	trans	0.546	0.67	NA	NA	NA
rs16825688	2448382	PTGS2	DBP_meta_BF05	chr1	186632287	cis	0.903	0.761	NA	NA	NA
rs16825875	2448382	PTGS2	DBP_meta_BF05	chr1	186745922	cis	0.802	0.85	NA	NA	NA
rs16825915	2448382	PTGS2	DBP_meta_BF05	chr1	186762816	cis	0.981	0.71	NA	NA	NA
rs16825962	2448382	PTGS2	DBP_meta_BF05	chr1	186769670	cis	0.799	0.835	NA	NA	NA
rs16826066	2448382	PTGS2	DBP_meta_BF05	chr1	186856228	cis	0.926	0.25	NA	NA	NA
rs16831300	2439842	TAGLN2	SBP_meta_BF05	chr1	160006472	cis	0.762	0.576	NA	NA	NA
rs16833743	2435383	S100A10	DBP_meta_BF05	chr1	151964879	cis	0.56	0.806	NA	NA	NA
rs168476	2508611	ARHGAP15	DBP_meta_BF05	chr2	143780332	cis	0.205	0.149	NA	NA	NA
rs16858506	2508611	ARHGAP15	DBP_meta_BF05	chr2	143779699	cis	0.661	0.779	NA	NA	NA
rs16858510	2508611	ARHGAP15	DBP_meta_BF05	chr2	143781236	cis	0.663	0.784	NA	NA	NA
rs16858573	2508611	ARHGAP15	DBP_meta_BF05	chr2	143875725	cis	0.848	0.468	NA	NA	NA
rs16858857	2508611	ARHGAP15	DBP_meta_BF05	chr2	143969046	cis	0.179	0.191	NA	NA	NA
rs16858944	2508611	ARHGAP15	DBP_meta_BF05	chr2	144022954	cis	0.895	0.468	NA	NA	NA
rs16858984	2508611	ARHGAP15	DBP_meta_BF05	chr2	144039139	cis	0.993	0.949	NA	NA	NA
rs16859454	3959986	IL2RB	DBP_meta_BF05	chr3	147152427	trans	0.876	0.874	NA	NA	NA
rs16859582	3185498	SLC31A2	SBP_meta_BF05/DBP_meta_BF05/HTN_meta_BF05	chr1	233921648	trans	0.177	0.247	NA	NA	NA
rs16859585	3185498	SLC31A2	SBP_meta_BF05/DBP_meta_BF05/HTN_meta_BF05	chr1	233922544	trans	0.145	0.215	NA	NA	NA
rs16859597	3185498	SLC31A2	SBP_meta_BF05/DBP_meta_BF05/HTN_meta_BF05	chr1	233928628	trans	0.105	0.179	NA	NA	NA
rs16862417	2761837	FGFBP2	SBP_meta_BF05	chr2	174991117	trans	0.0878	0.479	NA	NA	NA
rs16862482	2761837	FGFBP2	SBP_meta_BF05	chr2	175086039	trans	0.0913	0.509	NA	NA	NA
rs16862488	2761837	FGFBP2	SBP_meta_BF05	chr2	175086153	trans	0.0926	0.517	NA	NA	NA
rs16862489	2761837	FGFBP2	SBP_meta_BF05	chr2	175086181	trans	0.0933	0.519	NA	NA	NA
rs16863347	2491745	GNLY	SBP_meta_BF05	chr2	176530371	trans	0.876	0.177	NA	NA	NA
rs1687694	3236958	VIM	DBP_meta_BF05	chr10	17013192	cis	0.0334	0.132	NA	NA	NA
rs1687696	3236958	VIM	DBP_meta_BF05	chr10	17012862	cis	0.00172	0.0412	NA	NA	NA
rs1687700	3236958	VIM	DBP_meta_BF05	chr10	17011014	cis	0.0183	0.15	NA	NA	NA
rs1687701	3236958	VIM	DBP_meta_BF05	chr10	17010991	cis	0.0182	0.149	NA	NA	NA
rs1687702	3236958	VIM	DBP_meta_BF05	chr10	17010798	cis	0.0162	0.151	NA	NA	NA
rs1687703	3236958	VIM	DBP_meta_BF05	chr10	17010742	cis	0.0161	0.154	NA	NA	NA
rs1687704	3236958	VIM	DBP_meta_BF05	chr10	17010732	cis	0.0161	0.154	NA	NA	NA
rs1687705	3236958	VIM	DBP_meta_BF05	chr10	17008946	cis	0.0769	0.457	NA	NA	NA
rs1687706	3236958	VIM	DBP_meta_BF05	chr10	17008183	cis	0.0871	0.507	NA	NA	NA
rs1687711	3236958	VIM	DBP_meta_BF05	chr10	17007402	cis	0.0736	0.439	NA	NA	NA
rs1687712	3236958	VIM	DBP_meta_BF05	chr10	17005754	cis	0.0736	0.423	NA	NA	NA
rs1687713	3236958	VIM	DBP_meta_BF05	chr10	17004709	cis	0.074	0.422	NA	NA	NA
rs1687714	3236958	VIM	DBP_meta_BF05	chr10	17004559	cis	0.0766	0.429	NA	NA	NA
rs1688028	3830002	GRAMD1A	SBP_meta_BF05/DBP_meta_BF05	chr19	35557794	cis	0.887	0.825	NA	NA	NA
rs1688029	3830002	GRAMD1A	SBP_meta_BF05/DBP_meta_BF05	chr19	35557440	cis	0.35	0.711	NA	NA	NA
rs16889420	2982076	TAGAP	HTN_meta_BF05/SBP_meta_BF05	chr6	159462896	cis	0.239	0.481	NA	NA	NA
rs16891775	2761734	FBXL5	DBP_meta_BF05	chr4	15361794	cis	0.969	0.519	NA	NA	NA
rs16892092	2761734	FBXL5	DBP_meta_BF05	chr4	15517936	cis	0.135	0.84	NA	NA	NA
rs16892104	2761734	FBXL5	DBP_meta_BF05	chr4	15521975	cis	0.147	0.88	NA	NA	NA
rs16892107	2761734	FBXL5	DBP_meta_BF05	chr4	15522209	cis	0.148	0.873	NA	NA	NA
rs16892135	2761734	FBXL5	DBP_meta_BF05	chr4	15542197	cis	0.361	0.572	NA	NA	NA
rs16892140	2761734	FBXL5	DBP_meta_BF05	chr4	15548550	cis	0.375	0.153	NA	NA	NA
rs16892143	2761734	FBXL5	DBP_meta_BF05	chr4	15552118	cis	0.308	0.0419	NA	NA	NA
rs16892152	2761734	FBXL5	DBP_meta_BF05	chr4	15561253	cis	0.376	0.144	NA	NA	NA
rs16892156	2761734	FBXL5	DBP_meta_BF05	chr4	15562453	cis	0.301	0.0421	NA	NA	NA
rs16892260	2761734	FBXL5	DBP_meta_BF05	chr4	15713003	cis	0.561	0.933	NA	NA	NA
rs16892403	2761734	FBXL5	DBP_meta_BF05	chr4	15772644	cis	0.197	0.189	NA	NA	NA
rs16892407	2761734	FBXL5	DBP_meta_BF05	chr4	15773936	cis	0.957	0.952	NA	NA	NA
rs16892579	2761837	FGFBP2	SBP_meta_BF05	chr4	15917022	cis	0.842	0.936	NA	NA	NA
rs16892587	2761837	FGFBP2	SBP_meta_BF05	chr4	15922502	cis	0.865	0.96	NA	NA	NA
rs16892595	2761837	FGFBP2	SBP_meta_BF05	chr4	15922767	cis	0.913	0.859	NA	NA	NA
rs16892666	2761837	FGFBP2	SBP_meta_BF05	chr4	15950609	cis	0.877	0.81	NA	NA	NA
rs16892805	2761837	FGFBP2	SBP_meta_BF05	chr4	16019505	cis	0.576	0.609	NA	NA	NA
rs16892927	2761837	FGFBP2	SBP_meta_BF05	chr4	16069798	cis	0.201	0.569	NA	NA	NA
rs16910202	3185498	SLC31A2	SBP_meta_BF05/DBP_meta_BF05/HTN_meta_BF05	chr9	115928566	cis	0.342	0.697	NA	NA	NA
rs16911386	3185498	SLC31A2	SBP_meta_BF05/DBP_meta_BF05/HTN_meta_BF05	chr9	115940484	cis	0.298	0.367	NA	NA	NA
rs16912536	3185498	SLC31A2	SBP_meta_BF05/DBP_meta_BF05/HTN_meta_BF05	chr9	115950400	cis	0.608	0.214	NA	NA	NA
rs16926630	3185498	SLC31A2	SBP_meta_BF05/DBP_meta_BF05/HTN_meta_BF05	chr9	115955271	cis	0.269	0.328	NA	NA	NA
rs16927031	3185498	SLC31A2	SBP_meta_BF05/DBP_meta_BF05/HTN_meta_BF05	chr9	115959520	cis	0.576	0.216	NA	NA	NA
rs16927294	3594825	PIGB	SBP_meta_BF05	chr9	126985334	trans	0.0368	0.0509	NA	NA	NA
rs16927294	3841076	MYADM	SBP_meta_BF05/DBP_meta_BF05/HTN_meta_BF05	chr9	126985334	trans	0.0368	0.0509	NA	NA	NA
rs16927326	3841076	MYADM	SBP_meta_BF05/DBP_meta_BF05/HTN_meta_BF05	chr9	127043695	trans	0.227	0.104	NA	NA	NA
rs16927327	3841076	MYADM	SBP_meta_BF05/DBP_meta_BF05/HTN_meta_BF05	chr9	127047450	trans	0.214	0.0984	NA	NA	NA
rs16930586	3185498	SLC31A2	SBP_meta_BF05/DBP_meta_BF05/HTN_meta_BF05	chr10	30080348	trans	0.691	0.203	NA	NA	NA
rs16930959	3185498	SLC31A2	SBP_meta_BF05/DBP_meta_BF05/HTN_meta_BF05	chr9	116011458	cis	0.994	0.318	NA	NA	NA
rs16932583	3185498	SLC31A2	SBP_meta_BF05/DBP_meta_BF05/HTN_meta_BF05	chr9	116078371	cis	0.852	0.569	NA	NA	NA
rs16932649	3185498	SLC31A2	SBP_meta_BF05/DBP_meta_BF05/HTN_meta_BF05	chr9	116084691	cis	0.81	0.51	NA	NA	NA
rs169396	3174816	ANXA1	DBP_meta_BF05	chr9	76093349	cis	0.531	0.76	NA	NA	NA
rs16973566	3862108	CLC	DBP_meta_BF05	chr19	40176917	cis	0.823	0.75	NA	NA	NA
rs16973568	3862108	CLC	DBP_meta_BF05	chr19	40177041	cis	0.806	0.744	NA	NA	NA
rs16975266	3733275	KCNJ2	HTN_meta_BF05/DBP_meta_BF05	chr17	68149253	cis	0.242	0.36	NA	NA	NA
rs16985827	2448382	PTGS2	DBP_meta_BF05	chr22	39765225	trans	0.544	0.307	NA	NA	NA
rs16985831	2448382	PTGS2	DBP_meta_BF05	chr22	39765293	trans	0.565	0.289	NA	NA	NA
rs16991985	3236958	VIM	DBP_meta_BF05	chr19	3663425	trans	0.568	0.534	NA	NA	NA
rs16991994	3236958	VIM	DBP_meta_BF05	chr19	3675725	trans	0.741	0.356	NA	NA	NA
rs17001013	2448382	PTGS2	DBP_meta_BF05	chr22	39765379	trans	0.569	0.292	NA	NA	NA
rs17001014	2448382	PTGS2	DBP_meta_BF05	chr22	39765946	trans	0.592	0.3	NA	NA	NA
rs17004232	2774971	ANTXR2	DBP_meta_BF05	chr4	80678253	cis	0.505	0.197	NA	NA	NA
rs17004380	2774971	ANTXR2	DBP_meta_BF05	chr4	80706259	cis	0.864	0.874	NA	NA	NA
rs17012948	3558375	GZMB	HTN_meta_BF05	chr4	88615772	trans	0.606	0.996	NA	NA	NA
rs17013005	3558375	GZMB	HTN_meta_BF05	chr4	88650195	trans	0.549	0.903	NA	NA	NA
rs17026396	2491745	GNLY	SBP_meta_BF05	chr2	85759127	cis	0.804	0.741	NA	NA	NA
rs17026540	2491745	GNLY	SBP_meta_BF05	chr2	85913162	cis	0.302	0.0632	NA	NA	NA
rs17026595	2491745	GNLY	SBP_meta_BF05	chr2	85934115	cis	0.919	0.347	NA	NA	NA
rs17041612	2608725	BHLHE40	SBP_meta_BF05/DBP_meta_BF05	chr3	4905976	cis	0.26	0.18	NA	NA	NA
rs17041758	2608725	BHLHE40	SBP_meta_BF05/DBP_meta_BF05	chr3	4975451	cis	0.0836	0.991	NA	NA	NA
rs17051670	3293435	PRF1	SBP_meta_BF05/DBP_meta_BF05	chr13	35449442	trans	0.0596	0.0341	NA	NA	NA
rs17052404	3558375	GZMB	HTN_meta_BF05	chr3	52776664	trans	0.588	0.149	NA	NA	NA
rs17054137	2883349	HAVCR2	DBP_meta_BF05	chr5	156472930	cis	0.33	0.388	NA	NA	NA
rs17058010	3174816	ANXA1	DBP_meta_BF05	chr9	75231497	cis	0.902	0.505	NA	NA	NA
rs17058037	3174816	ANXA1	DBP_meta_BF05	chr9	75245546	cis	0.748	0.573	NA	NA	NA
rs17058052	3174816	ANXA1	DBP_meta_BF05	chr9	75252198	cis	0.866	0.488	NA	NA	NA
rs17058057	3174816	ANXA1	DBP_meta_BF05	chr9	75257072	cis	0.782	0.535	NA	NA	NA
rs17058062	3174816	ANXA1	DBP_meta_BF05	chr9	75262770	cis	0.836	0.455	NA	NA	NA
rs17058074	3174816	ANXA1	DBP_meta_BF05	chr9	75281519	cis	0.839	0.582	NA	NA	NA
rs17058362	3174816	ANXA1	DBP_meta_BF05	chr9	75647295	cis	0.737	0.682	NA	NA	NA
rs17058421	3174816	ANXA1	DBP_meta_BF05	chr9	75709442	cis	0.932	0.328	NA	NA	NA
rs17058426	3174816	ANXA1	DBP_meta_BF05	chr9	75714313	cis	0.395	0.095	NA	NA	NA
rs17058437	3174816	ANXA1	DBP_meta_BF05	chr9	75715742	cis	0.424	0.104	NA	NA	NA
rs17058468	3174816	ANXA1	DBP_meta_BF05	chr9	75729895	cis	0.769	0.196	NA	NA	NA
rs17058490	3174816	ANXA1	DBP_meta_BF05	chr9	75734316	cis	0.631	0.118	NA	NA	NA
rs17058508	3174816	ANXA1	DBP_meta_BF05	chr9	75749645	cis	0.813	0.244	NA	NA	NA
rs17058511	3174816	ANXA1	DBP_meta_BF05	chr9	75752645	cis	0.839	0.276	NA	NA	NA
rs17058589	3174816	ANXA1	DBP_meta_BF05	chr9	75793444	cis	0.465	0.564	NA	NA	NA
rs17058649	3174816	ANXA1	DBP_meta_BF05	chr9	75857825	cis	0.779	0.533	NA	NA	NA
rs17058651	3174816	ANXA1	DBP_meta_BF05	chr9	75858136	cis	0.605	0.934	NA	NA	NA
rs17058682	3174816	ANXA1	DBP_meta_BF05	chr9	75895599	cis	0.205	0.0696	NA	NA	NA
rs17058686	3174816	ANXA1	DBP_meta_BF05	chr9	75899299	cis	0.532	0.813	NA	NA	NA
rs17058723	3174816	ANXA1	DBP_meta_BF05	chr9	75919308	cis	0.809	0.73	NA	NA	NA
rs17058727	3174816	ANXA1	DBP_meta_BF05	chr9	75919694	cis	0.797	0.722	NA	NA	NA
rs17058729	3174816	ANXA1	DBP_meta_BF05	chr9	75921571	cis	0.161	0.0569	NA	NA	NA
rs17058732	3174816	ANXA1	DBP_meta_BF05	chr9	75922054	cis	0.148	0.0482	NA	NA	NA
rs17058735	3174816	ANXA1	DBP_meta_BF05	chr9	75922205	cis	0.148	0.0538	NA	NA	NA
rs17058741	3174816	ANXA1	DBP_meta_BF05	chr9	75936857	cis	0.975	0.489	NA	NA	NA
rs17058744	3174816	ANXA1	DBP_meta_BF05	chr9	75938463	cis	0.148	0.0481	NA	NA	NA
rs17058754	3174816	ANXA1	DBP_meta_BF05	chr9	75942137	cis	0.931	0.878	NA	NA	NA
rs17058758	3174816	ANXA1	DBP_meta_BF05	chr9	75942376	cis	0.151	0.0506	NA	NA	NA
rs17058767	3174816	ANXA1	DBP_meta_BF05	chr9	75949003	cis	0.969	0.423	NA	NA	NA
rs17058783	3174816	ANXA1	DBP_meta_BF05	chr9	75970224	cis	0.889	0.575	NA	NA	NA
rs17058790	3174816	ANXA1	DBP_meta_BF05	chr9	75972754	cis	0.108	0.036	NA	NA	NA
rs17058804	3174816	ANXA1	DBP_meta_BF05	chr9	75982965	cis	0.87	0.583	NA	NA	NA
rs17058807	3174816	ANXA1	DBP_meta_BF05	chr9	75983055	cis	0.87	0.582	NA	NA	NA
rs17058849	3174816	ANXA1	DBP_meta_BF05	chr9	76038127	cis	0.881	0.539	NA	NA	NA
rs17059091	3174816	ANXA1	DBP_meta_BF05	chr9	76193871	cis	0.751	0.869	NA	NA	NA
rs17064328	2982076	TAGAP	HTN_meta_BF05/SBP_meta_BF05	chr18	55760901	trans	0.0477	0.829	NA	NA	NA
rs17064331	2982076	TAGAP	HTN_meta_BF05/SBP_meta_BF05	chr18	55761864	trans	0.0837	0.813	NA	NA	NA
rs17069720	2608725	BHLHE40	SBP_meta_BF05/DBP_meta_BF05	chr5	167478256	trans	0.409	0.196	NA	NA	NA
rs17069724	2608725	BHLHE40	SBP_meta_BF05/DBP_meta_BF05	chr5	167480319	trans	0.0711	0.0684	NA	NA	NA
rs1707273	3236958	VIM	DBP_meta_BF05	chr10	17008901	cis	0.0811	0.47	NA	NA	NA
rs1707274	3236958	VIM	DBP_meta_BF05	chr10	17008961	cis	0.0814	0.473	NA	NA	NA
rs1707275	3236958	VIM	DBP_meta_BF05	chr10	17009102	cis	0.0727	0.423	NA	NA	NA
rs1707276	3236958	VIM	DBP_meta_BF05	chr10	17009244	cis	0.0845	0.489	NA	NA	NA
rs1707277	3236958	VIM	DBP_meta_BF05	chr10	17009299	cis	0.0908	0.494	NA	NA	NA
rs1707278	3236958	VIM	DBP_meta_BF05	chr10	17009642	cis	0.0885	0.494	NA	NA	NA
rs1707280	3236958	VIM	DBP_meta_BF05	chr10	17009736	cis	0.0882	0.493	NA	NA	NA
rs1707281	3236958	VIM	DBP_meta_BF05	chr10	17010965	cis	0.0138	0.121	NA	NA	NA
rs1707285	3236958	VIM	DBP_meta_BF05	chr10	17013712	cis	0.00304	0.13	NA	NA	NA
rs1707289	3236958	VIM	DBP_meta_BF05	chr10	17004730	cis	0.0732	0.42	NA	NA	NA
rs17075176	2887309	DUSP1	SBP_meta_BF05	chr5	172215412	cis	0.685	0.524	NA	NA	NA
rs17086157	2982076	TAGAP	HTN_meta_BF05/SBP_meta_BF05	chr4	56777124	trans	0.676	0.835	NA	NA	NA
rs17092517	3550077	GLRX5	SBP_meta_BF05	chr14	95948460	cis	0.322	0.341	NA	NA	NA
rs17092540	3550077	GLRX5	SBP_meta_BF05	chr14	95950500	cis	0.444	0.261	NA	NA	NA
rs17092581	3550077	GLRX5	SBP_meta_BF05	chr14	95967396	cis	0.515	0.504	NA	NA	NA
rs17092609	3550077	GLRX5	SBP_meta_BF05	chr14	95972631	cis	0.155	0.548	NA	NA	NA
rs17092611	3550077	GLRX5	SBP_meta_BF05	chr14	95972976	cis	0.154	0.541	NA	NA	NA
rs17092615	3550077	GLRX5	SBP_meta_BF05	chr14	95973619	cis	0.196	0.695	NA	NA	NA
rs17092711	3550077	GLRX5	SBP_meta_BF05	chr14	96023728	cis	0.0514	0.0182	NA	NA	NA
rs17092734	3550077	GLRX5	SBP_meta_BF05	chr14	96027440	cis	0.2	0.792	NA	NA	NA
rs17092794	3550077	GLRX5	SBP_meta_BF05	chr14	96038299	cis	0.213	0.931	NA	NA	NA
rs17092799	3550077	GLRX5	SBP_meta_BF05	chr14	96040799	cis	0.241	0.864	NA	NA	NA
rs17092828	3550077	GLRX5	SBP_meta_BF05	chr14	96047601	cis	0.228	0.998	NA	NA	NA
rs17092955	3550077	GLRX5	SBP_meta_BF05	chr14	96081498	cis	0.0425	0.0387	NA	NA	NA
rs17093106	3550077	GLRX5	SBP_meta_BF05	chr14	96116283	cis	0.0298	0.0884	NA	NA	NA
rs17093131	3550077	GLRX5	SBP_meta_BF05	chr14	96125649	cis	0.308	0.292	NA	NA	NA
rs17104242	3558375	GZMB	HTN_meta_BF05	chr14	24951018	cis	0.904	0.845	NA	NA	NA
rs17105315	3558375	GZMB	HTN_meta_BF05	chr14	25045608	cis	0.739	0.829	NA	NA	NA
rs17108566	3558375	GZMB	HTN_meta_BF05	chr14	25296554	cis	0.353	0.0888	NA	NA	NA
rs17108738	3558375	GZMB	HTN_meta_BF05	chr14	25308387	cis	0.312	0.138	NA	NA	NA
rs17129118	2448382	PTGS2	DBP_meta_BF05	chr12	41605629	trans	0.327	0.922	NA	NA	NA
rs17129138	2448382	PTGS2	DBP_meta_BF05	chr12	41615488	trans	0.397	0.746	NA	NA	NA
rs17139978	3236958	VIM	DBP_meta_BF05	chr10	17191468	cis	0.491	0.726	NA	NA	NA
rs17139991	3236958	VIM	DBP_meta_BF05	chr10	17194026	cis	0.479	0.755	NA	NA	NA
rs17140190	3236958	VIM	DBP_meta_BF05	chr10	17231569	cis	0.493	0.957	NA	NA	NA
rs17145874	3375735	AHNAK	SBP_meta_BF05	chr11	62195344	cis	0.539	0.23	NA	NA	NA
rs17145884	3375735	AHNAK	SBP_meta_BF05	chr11	62200176	cis	0.494	0.228	NA	NA	NA
rs17145892	3375735	AHNAK	SBP_meta_BF05	chr11	62200269	cis	0.495	0.228	NA	NA	NA
rs17157227	3375735	AHNAK	SBP_meta_BF05	chr11	62169772	cis	0.58	0.0586	NA	NA	NA
rs17157266	3375735	AHNAK	SBP_meta_BF05	chr11	62199817	cis	0.441	0.209	NA	NA	NA
rs17184815	3558375	GZMB	HTN_meta_BF05	chr14	24951305	cis	0.98	0.948	NA	NA	NA
rs17184829	3558375	GZMB	HTN_meta_BF05	chr14	24968358	cis	0.976	0.932	NA	NA	NA
rs17199955	3558375	GZMB	HTN_meta_BF05	chr14	24881591	cis	0.532	0.877	NA	NA	NA
rs17200187	3558375	GZMB	HTN_meta_BF05	chr14	25075057	cis	0.835	0.584	NA	NA	NA
rs17221879	3594825	PIGB	SBP_meta_BF05	chr9	127002414	trans	0.192	0.114	NA	NA	NA
rs17221879	3841076	MYADM	SBP_meta_BF05/DBP_meta_BF05/HTN_meta_BF05	chr9	127002414	trans	0.192	0.114	NA	NA	NA
rs17227678	2508611	ARHGAP15	DBP_meta_BF05	chr2	144017894	cis	0.807	0.624	NA	NA	NA
rs17228139	2508611	ARHGAP15	DBP_meta_BF05	chr2	144034099	cis	0.965	0.983	NA	NA	NA
rs17230746	2508611	ARHGAP15	DBP_meta_BF05	chr2	144194565	cis	0.116	0.16	NA	NA	NA
rs17237604	3733275	KCNJ2	HTN_meta_BF05/DBP_meta_BF05	chr6	147323281	trans	0.78	0.235	NA	NA	NA
rs17257083	3558375	GZMB	HTN_meta_BF05	chr14	25074711	cis	0.957	0.605	NA	NA	NA
rs17257110	3558375	GZMB	HTN_meta_BF05	chr14	25107523	cis	0.713	0.969	NA	NA	NA
rs173135	3733275	KCNJ2	HTN_meta_BF05/DBP_meta_BF05	chr17	68172326	cis	0.223	0.559	NA	NA	NA
rs17313621	3841076	MYADM	SBP_meta_BF05/DBP_meta_BF05/HTN_meta_BF05	chr9	127047976	trans	0.222	0.102	NA	NA	NA
rs17325839	3662808	GPR56	SBP_meta_BF05/DBP_meta_BF05	chr16	57676901	cis	0.491	0.996	NA	NA	NA
rs17353510	2435383	S100A10	DBP_meta_BF05	chr9	88611679	trans	0.641	0.179	NA	NA	NA
rs17384915	2761734	FBXL5	DBP_meta_BF05	chr4	15424176	cis	0.0748	0.0474	NA	NA	NA
rs17385047	2761734	FBXL5	DBP_meta_BF05	chr4	15433195	cis	0.12	0.06	NA	NA	NA
rs17385451	2761734	FBXL5	DBP_meta_BF05	chr4	15494320	cis	0.223	0.173	NA	NA	NA
rs17385493	2761734	FBXL5	DBP_meta_BF05	chr4	15502909	cis	0.489	0.517	NA	NA	NA
rs17387037	2761837	FGFBP2	SBP_meta_BF05	chr4	15992783	cis	0.812	0.749	NA	NA	NA
rs17387100	2761837	FGFBP2	SBP_meta_BF05	chr4	15995125	cis	0.565	0.668	NA	NA	NA
rs17387169	2761837	FGFBP2	SBP_meta_BF05	chr4	16001175	cis	0.276	0.122	NA	NA	NA
rs17387271	2761837	FGFBP2	SBP_meta_BF05	chr4	16013048	cis	0.655	0.287	NA	NA	NA
rs17405797	2761734	FBXL5	DBP_meta_BF05	chr4	15685776	cis	0.266	0.786	NA	NA	NA
rs17405811	2761734	FBXL5	DBP_meta_BF05	chr4	15685805	cis	0.425	0.375	NA	NA	NA
rs17408310	2761734	FBXL5	DBP_meta_BF05	chr4	15771939	cis	0.186	0.179	NA	NA	NA
rs17416054	3862108	CLC	DBP_meta_BF05	chr1	101297277	trans	0.273	0.973	NA	NA	NA
rs17430897	2491745	GNLY	SBP_meta_BF05	chr2	85912962	cis	0.0415	0.0272	NA	NA	NA
rs1743490	3550077	GLRX5	SBP_meta_BF05	chr14	96130617	cis	0.372	0.967	NA	NA	NA
rs1743492	3550077	GLRX5	SBP_meta_BF05	chr14	96133994	cis	0.15	0.193	NA	NA	NA
rs1743506	3550077	GLRX5	SBP_meta_BF05	chr14	96143580	cis	0.604	0.501	NA	NA	NA
rs17435331	3236958	VIM	DBP_meta_BF05	chr10	17193269	cis	0.477	0.757	NA	NA	NA
rs17463278	2774971	ANTXR2	DBP_meta_BF05	chr4	80989322	cis	0.569	0.84	NA	NA	NA
rs17464115	2774971	ANTXR2	DBP_meta_BF05	chr4	81057927	cis	0.404	0.795	NA	NA	NA
rs17469433	2761734	FBXL5	DBP_meta_BF05	chr4	15422830	cis	0.0767	0.0478	NA	NA	NA
rs17469572	2761734	FBXL5	DBP_meta_BF05	chr4	15433978	cis	0.125	0.0566	NA	NA	NA
rs17469634	2761734	FBXL5	DBP_meta_BF05	chr4	15441980	cis	0.117	0.053	NA	NA	NA
rs17469724	2761734	FBXL5	DBP_meta_BF05	chr4	15452081	cis	0.106	0.0767	NA	NA	NA
rs17476642	2761734	FBXL5	DBP_meta_BF05	chr4	15539779	cis	0.0898	0.442	NA	NA	NA
rs17476670	2761734	FBXL5	DBP_meta_BF05	chr4	15548311	cis	0.298	0.0422	NA	NA	NA
rs17477869	2761837	FGFBP2	SBP_meta_BF05	chr4	15991015	cis	0.3	0.961	NA	NA	NA
rs17477995	2761837	FGFBP2	SBP_meta_BF05	chr4	15997097	cis	0.329	0.12	NA	NA	NA
rs17478044	2761837	FGFBP2	SBP_meta_BF05	chr4	16000334	cis	0.297	0.107	NA	NA	NA
rs17478336	2761837	FGFBP2	SBP_meta_BF05	chr4	16025837	cis	0.488	0.514	NA	NA	NA
rs17488270	2761837	FGFBP2	SBP_meta_BF05	chr4	16508853	cis	0.429	0.404	NA	NA	NA
rs1748932	3550077	GLRX5	SBP_meta_BF05	chr14	96140084	cis	0.553	0.505	NA	NA	NA
rs1748935	3550077	GLRX5	SBP_meta_BF05	chr14	96140559	cis	0.304	0.594	NA	NA	NA
rs1748963	3550077	GLRX5	SBP_meta_BF05	chr14	96133913	cis	0.149	0.19	NA	NA	NA
rs17495226	2608725	BHLHE40	SBP_meta_BF05/DBP_meta_BF05	chr4	37642746	trans	0.996	0.55	NA	NA	NA
rs17495240	2608725	BHLHE40	SBP_meta_BF05/DBP_meta_BF05	chr4	37643300	trans	0.913	0.58	NA	NA	NA
rs17495384	2608725	BHLHE40	SBP_meta_BF05/DBP_meta_BF05	chr4	37658766	trans	0.885	0.991	NA	NA	NA
rs1750676	2491745	GNLY	SBP_meta_BF05	chr14	87736720	trans	0.553	0.678	NA	NA	NA
rs1750677	2491745	GNLY	SBP_meta_BF05	chr14	87738389	trans	0.552	0.668	NA	NA	NA
rs17507682	2774971	ANTXR2	DBP_meta_BF05	chr4	80620882	cis	0.984	0.877	NA	NA	NA
rs17508809	2491745	GNLY	SBP_meta_BF05	chr2	85869770	cis	0.338	0.839	NA	NA	NA
rs17509015	2774971	ANTXR2	DBP_meta_BF05	chr4	80666867	cis	0.761	0.587	NA	NA	NA
rs17509683	2774971	ANTXR2	DBP_meta_BF05	chr4	80988744	cis	0.66	0.754	NA	NA	NA
rs17509725	2774971	ANTXR2	DBP_meta_BF05	chr4	80989630	cis	0.428	0.509	NA	NA	NA
rs17525019	2448382	PTGS2	DBP_meta_BF05	chr1	186784140	cis	NA	NA	NA	NA	NA
rs17531757	2883349	HAVCR2	DBP_meta_BF05	chr4	42483659	trans	0.429	0.393	NA	NA	NA
rs1756657	2491745	GNLY	SBP_meta_BF05	chr14	87738493	trans	0.55	0.662	NA	NA	NA
rs1756658	2491745	GNLY	SBP_meta_BF05	chr14	87738275	trans	0.549	0.668	NA	NA	NA
rs1756659	2491745	GNLY	SBP_meta_BF05	chr14	87737592	trans	0.547	0.668	NA	NA	NA
rs1756660	2491745	GNLY	SBP_meta_BF05	chr14	87737292	trans	0.55	0.67	NA	NA	NA
rs17573291	3174816	ANXA1	DBP_meta_BF05	chr9	75731898	cis	0.12	0.169	NA	NA	NA
rs17574438	3174816	ANXA1	DBP_meta_BF05	chr9	75775116	cis	NA	NA	NA	NA	NA
rs17577550	2608725	BHLHE40	SBP_meta_BF05/DBP_meta_BF05	chr4	37637576	trans	0.867	0.621	NA	NA	NA
rs17583707	2435383	S100A10	DBP_meta_BF05	chr1	151919584	cis	0.974	0.778	NA	NA	NA
rs17602085	3174816	ANXA1	DBP_meta_BF05	chr9	76198138	cis	0.57	0.28	NA	NA	NA
rs17608	3862108	CLC	DBP_meta_BF05	chr19	40225646	cis	0.736	0.602	NA	NA	NA
rs17613339	3550077	GLRX5	SBP_meta_BF05	chr1	118139540	trans	0.914	0.0584	NA	NA	NA
rs17617943	2491745	GNLY	SBP_meta_BF05	chr2	85964832	cis	0.551	0.257	NA	NA	NA
rs17619365	3558375	GZMB	HTN_meta_BF05	chr4	137734929	trans	0.413	0.445	NA	NA	NA
rs17630235	3841076	MYADM	SBP_meta_BF05/DBP_meta_BF05/HTN_meta_BF05	chr12	112591686	trans	1.45e-08	2.92e-12	NA	NA	NA
rs17630235	2982076	TAGAP	HTN_meta_BF05/SBP_meta_BF05	chr12	112591686	trans	1.45e-08	2.92e-12	NA	NA	NA
rs17641224	3174816	ANXA1	DBP_meta_BF05	chr9	75429081	cis	0.836	0.444	NA	NA	NA
rs17641324	3174816	ANXA1	DBP_meta_BF05	chr9	75434647	cis	0.825	0.443	NA	NA	NA
rs17652063	3174816	ANXA1	DBP_meta_BF05	chr9	75740818	cis	0.132	0.17	NA	NA	NA
rs17653504	3174816	ANXA1	DBP_meta_BF05	chr9	75816850	cis	0.381	0.678	NA	NA	NA
rs17653511	3174816	ANXA1	DBP_meta_BF05	chr9	75819503	cis	0.719	0.528	NA	NA	NA
rs17653843	3174816	ANXA1	DBP_meta_BF05	chr9	75826285	cis	0.823	0.955	NA	NA	NA
rs17654113	3174816	ANXA1	DBP_meta_BF05	chr9	75830053	cis	0.351	0.616	NA	NA	NA
rs17654455	3174816	ANXA1	DBP_meta_BF05	chr9	75854817	cis	0.196	0.0814	NA	NA	NA
rs17654486	3174816	ANXA1	DBP_meta_BF05	chr9	75856404	cis	0.197	0.0765	NA	NA	NA
rs17655458	3174816	ANXA1	DBP_meta_BF05	chr9	75917123	cis	0.865	0.756	NA	NA	NA
rs17656269	3550077	GLRX5	SBP_meta_BF05	chr1	118162139	trans	0.946	0.114	NA	NA	NA
rs17657016	3174816	ANXA1	DBP_meta_BF05	chr9	76030069	cis	0.496	0.808	NA	NA	NA
rs17658759	3174816	ANXA1	DBP_meta_BF05	chr9	76166458	cis	0.723	0.368	NA	NA	NA
rs17659570	3174816	ANXA1	DBP_meta_BF05	chr9	76187476	cis	0.972	0.798	NA	NA	NA
rs17659963	3868998	NKG7	SBP_meta_BF05	chr19	51878841	cis	0.162	0.355	NA	NA	NA
rs17660123	3174816	ANXA1	DBP_meta_BF05	chr9	76199024	cis	0.561	0.255	NA	NA	NA
rs17696736	2982076	TAGAP	HTN_meta_BF05/SBP_meta_BF05	chr12	112486818	trans	3.43e-08	2.8e-11	Type 1 diabetes	SH2B3	2e-14
rs17696736	2982076	TAGAP	HTN_meta_BF05/SBP_meta_BF05	chr12	112486818	trans	3.43e-08	2.8e-11	Type 1 diabetes	C12orf30	6e-18
rs17696736	3544525	FOS	SBP_meta_BF05	chr12	112486818	trans	3.43e-08	2.8e-11	Type 1 diabetes	C12orf30	6e-18
rs17696736	2982076	TAGAP	HTN_meta_BF05/SBP_meta_BF05	chr12	112486818	trans	3.43e-08	2.8e-11	Type 1 diabetes	PTPN11	2e-14
rs17696736	2982076	TAGAP	HTN_meta_BF05/SBP_meta_BF05	chr12	112486818	trans	3.43e-08	2.8e-11	Type 1 diabetes	TRAFD1	2e-14
rs17696736	3544525	FOS	SBP_meta_BF05	chr12	112486818	trans	3.43e-08	2.8e-11	Type 1 diabetes	PTPN11	2e-14
rs17696736	3544525	FOS	SBP_meta_BF05	chr12	112486818	trans	3.43e-08	2.8e-11	Type 1 diabetes	TRAFD1	2e-14
rs17696736	3544525	FOS	SBP_meta_BF05	chr12	112486818	trans	3.43e-08	2.8e-11	Type 1 diabetes	C12orf30	2e-16
rs17696736	3544525	FOS	SBP_meta_BF05	chr12	112486818	trans	3.43e-08	2.8e-11	Type 1 diabetes	SH2B3	2e-14
rs17696736	2435383	S100A10	DBP_meta_BF05	chr12	112486818	trans	3.43e-08	2.8e-11	Type 1 diabetes	C12orf30	2e-16
rs17696736	2982076	TAGAP	HTN_meta_BF05/SBP_meta_BF05	chr12	112486818	trans	3.43e-08	2.8e-11	Type 1 diabetes	C12orf30	2e-16
rs17696736	2435383	S100A10	DBP_meta_BF05	chr12	112486818	trans	3.43e-08	2.8e-11	Type 1 diabetes	PTPN11	2e-14
rs17696736	2435383	S100A10	DBP_meta_BF05	chr12	112486818	trans	3.43e-08	2.8e-11	Type 1 diabetes	TRAFD1	2e-14
rs17696736	2435383	S100A10	DBP_meta_BF05	chr12	112486818	trans	3.43e-08	2.8e-11	Type 1 diabetes	LNK	2e-14
rs17696736	3841076	MYADM	SBP_meta_BF05/DBP_meta_BF05/HTN_meta_BF05	chr12	112486818	trans	3.43e-08	2.8e-11	Type 1 diabetes	C12orf30	6e-18
rs17696736	3841076	MYADM	SBP_meta_BF05/DBP_meta_BF05/HTN_meta_BF05	chr12	112486818	trans	3.43e-08	2.8e-11	Type 1 diabetes	C12orf30	2e-16
rs17696736	3841076	MYADM	SBP_meta_BF05/DBP_meta_BF05/HTN_meta_BF05	chr12	112486818	trans	3.43e-08	2.8e-11	Type 1 diabetes	SH2B3	2e-14
rs17696736	3841076	MYADM	SBP_meta_BF05/DBP_meta_BF05/HTN_meta_BF05	chr12	112486818	trans	3.43e-08	2.8e-11	Type 1 diabetes	PTPN11	2e-14
rs17696736	3841076	MYADM	SBP_meta_BF05/DBP_meta_BF05/HTN_meta_BF05	chr12	112486818	trans	3.43e-08	2.8e-11	Type 1 diabetes	TRAFD1	2e-14
rs17696736	3841076	MYADM	SBP_meta_BF05/DBP_meta_BF05/HTN_meta_BF05	chr12	112486818	trans	3.43e-08	2.8e-11	Type 1 diabetes	LNK	2e-14
rs17696736	3544525	FOS	SBP_meta_BF05	chr12	112486818	trans	3.43e-08	2.8e-11	Type 1 diabetes	LNK	2e-14
rs17696736	2761837	FGFBP2	SBP_meta_BF05	chr12	112486818	trans	3.43e-08	2.8e-11	Type 1 diabetes	C12orf30	2e-16
rs17696736	2761837	FGFBP2	SBP_meta_BF05	chr12	112486818	trans	3.43e-08	2.8e-11	Type 1 diabetes	SH2B3	2e-14
rs17696736	2435383	S100A10	DBP_meta_BF05	chr12	112486818	trans	3.43e-08	2.8e-11	Type 1 diabetes	SH2B3	2e-14
rs17696736	2761837	FGFBP2	SBP_meta_BF05	chr12	112486818	trans	3.43e-08	2.8e-11	Type 1 diabetes	TRAFD1	2e-14
rs17696736	2761837	FGFBP2	SBP_meta_BF05	chr12	112486818	trans	3.43e-08	2.8e-11	Type 1 diabetes	LNK	2e-14
rs17696736	2982076	TAGAP	HTN_meta_BF05/SBP_meta_BF05	chr12	112486818	trans	3.43e-08	2.8e-11	Type 1 diabetes	LNK	2e-14
rs17696736	2761837	FGFBP2	SBP_meta_BF05	chr12	112486818	trans	3.43e-08	2.8e-11	Type 1 diabetes	C12orf30	6e-18
rs17696736	2435383	S100A10	DBP_meta_BF05	chr12	112486818	trans	3.43e-08	2.8e-11	Type 1 diabetes	C12orf30	6e-18
rs17696736	2761837	FGFBP2	SBP_meta_BF05	chr12	112486818	trans	3.43e-08	2.8e-11	Type 1 diabetes	PTPN11	2e-14
rs17698306	3959986	IL2RB	DBP_meta_BF05	chr15	70748987	trans	0.972	0.802	NA	NA	NA
rs17702078	3733275	KCNJ2	HTN_meta_BF05/DBP_meta_BF05	chr17	68134618	cis	0.603	0.0984	NA	NA	NA
rs17703427	3733275	KCNJ2	HTN_meta_BF05/DBP_meta_BF05	chr17	68232008	cis	0.0608	0.0907	NA	NA	NA
rs17709471	3862108	CLC	DBP_meta_BF05	chr19	40227846	cis	0.914	0.869	NA	NA	NA
rs17712988	3174816	ANXA1	DBP_meta_BF05	chr10	83589134	trans	0.453	0.261	NA	NA	NA
rs17716331	3868998	NKG7	SBP_meta_BF05	chr19	51879291	cis	0.299	0.244	NA	NA	NA
rs17718103	3550077	GLRX5	SBP_meta_BF05	chr1	118156985	trans	0.662	0.232	NA	NA	NA
rs17733777	2982076	TAGAP	HTN_meta_BF05/SBP_meta_BF05	chr12	63098281	trans	0.633	0.0591	NA	NA	NA
rs17735501	2491745	GNLY	SBP_meta_BF05	chr2	85685211	cis	0.606	0.516	NA	NA	NA
rs17735885	2491745	GNLY	SBP_meta_BF05	chr2	85748719	cis	0.712	0.136	NA	NA	NA
rs17755206	3185498	SLC31A2	SBP_meta_BF05/DBP_meta_BF05/HTN_meta_BF05	chr9	115862518	cis	0.768	0.808	NA	NA	NA
rs17756362	3550077	GLRX5	SBP_meta_BF05	chr14	95963338	cis	0.503	0.171	NA	NA	NA
rs17756392	3550077	GLRX5	SBP_meta_BF05	chr14	95965302	cis	0.477	0.164	NA	NA	NA
rs17756410	3550077	GLRX5	SBP_meta_BF05	chr14	95965744	cis	0.437	0.149	NA	NA	NA
rs17756537	3550077	GLRX5	SBP_meta_BF05	chr14	95992431	cis	0.251	0.464	NA	NA	NA
rs17757618	3550077	GLRX5	SBP_meta_BF05	chr14	96138828	cis	0.34	0.565	NA	NA	NA
rs17762224	3185498	SLC31A2	SBP_meta_BF05/DBP_meta_BF05/HTN_meta_BF05	chr9	115938750	cis	0.158	0.248	NA	NA	NA
rs17762372	3185498	SLC31A2	SBP_meta_BF05/DBP_meta_BF05/HTN_meta_BF05	chr9	115942868	cis	0.287	0.143	NA	NA	NA
rs17762642	3185498	SLC31A2	SBP_meta_BF05/DBP_meta_BF05/HTN_meta_BF05	chr9	115951500	cis	0.499	0.783	NA	NA	NA
rs17762660	3185498	SLC31A2	SBP_meta_BF05/DBP_meta_BF05/HTN_meta_BF05	chr9	115952414	cis	0.646	0.578	NA	NA	NA
rs17763351	3185498	SLC31A2	SBP_meta_BF05/DBP_meta_BF05/HTN_meta_BF05	chr9	116005260	cis	0.544	0.204	NA	NA	NA
rs17764013	3185498	SLC31A2	SBP_meta_BF05/DBP_meta_BF05/HTN_meta_BF05	chr9	116046780	cis	0.166	0.0336	NA	NA	NA
rs17764563	3185498	SLC31A2	SBP_meta_BF05/DBP_meta_BF05/HTN_meta_BF05	chr9	116078468	cis	0.659	0.403	NA	NA	NA
rs17774111	2508611	ARHGAP15	DBP_meta_BF05	chr2	144372831	cis	0.0782	0.0519	NA	NA	NA
rs17784102	3550077	GLRX5	SBP_meta_BF05	chr14	96253809	cis	0.384	0.456	NA	NA	NA
rs17795034	3558375	GZMB	HTN_meta_BF05	chr14	24869465	cis	0.332	0.837	NA	NA	NA
rs17795046	3558375	GZMB	HTN_meta_BF05	chr14	24874512	cis	0.74	0.481	NA	NA	NA
rs17795070	3558375	GZMB	HTN_meta_BF05	chr14	24883630	cis	0.876	0.824	NA	NA	NA
rs17795514	3558375	GZMB	HTN_meta_BF05	chr14	25248293	cis	0.585	0.889	NA	NA	NA
rs17795652	3558375	GZMB	HTN_meta_BF05	chr14	25290873	cis	0.399	0.1	NA	NA	NA
rs17808482	2508611	ARHGAP15	DBP_meta_BF05	chr2	143790793	cis	0.68	0.528	NA	NA	NA
rs17812380	2508611	ARHGAP15	DBP_meta_BF05	chr2	143972020	cis	0.36	0.176	NA	NA	NA
rs17812607	2508611	ARHGAP15	DBP_meta_BF05	chr2	143980969	cis	0.973	0.41	NA	NA	NA
rs17812739	2508611	ARHGAP15	DBP_meta_BF05	chr2	143982018	cis	NA	NA	NA	NA	NA
rs17814208	2508611	ARHGAP15	DBP_meta_BF05	chr2	144037998	cis	0.651	0.389	NA	NA	NA
rs17814502	2508611	ARHGAP15	DBP_meta_BF05	chr2	144053301	cis	0.653	0.401	NA	NA	NA
rs17819126	3594825	PIGB	SBP_meta_BF05	chr15	55789910	cis	0.0345	0.0162	NA	NA	NA
rs17825609	2508611	ARHGAP15	DBP_meta_BF05	chr2	144392595	cis	0.0777	0.0518	NA	NA	NA
rs17826726	2508611	ARHGAP15	DBP_meta_BF05	chr2	144181441	cis	0.272	0.209	NA	NA	NA
rs17828145	3185498	SLC31A2	SBP_meta_BF05/DBP_meta_BF05/HTN_meta_BF05	chr9	115865501	cis	0.413	0.417	NA	NA	NA
rs17828717	3185498	SLC31A2	SBP_meta_BF05/DBP_meta_BF05/HTN_meta_BF05	chr9	115902430	cis	0.808	0.557	NA	NA	NA
rs17829209	3550077	GLRX5	SBP_meta_BF05	chr14	95950162	cis	0.358	0.38	NA	NA	NA
rs17830011	2982076	TAGAP	HTN_meta_BF05/SBP_meta_BF05	chr6	159432566	cis	0.534	0.225	NA	NA	NA
rs17831256	3185498	SLC31A2	SBP_meta_BF05/DBP_meta_BF05/HTN_meta_BF05	chr9	116042867	cis	0.968	0.614	NA	NA	NA
rs17834959	3550077	GLRX5	SBP_meta_BF05	chr14	95991174	cis	0.288	0.503	NA	NA	NA
rs1786	2761734	FBXL5	DBP_meta_BF05	chr4	15664453	cis	0.65	0.205	NA	NA	NA
rs179130	3550077	GLRX5	SBP_meta_BF05	chr14	95996558	cis	0.309	0.0646	NA	NA	NA
rs179131	3550077	GLRX5	SBP_meta_BF05	chr14	95996411	cis	0.367	0.0796	NA	NA	NA
rs179134	3550077	GLRX5	SBP_meta_BF05	chr14	95995558	cis	0.315	0.0716	NA	NA	NA
rs179135	3550077	GLRX5	SBP_meta_BF05	chr14	95993331	cis	0.306	0.285	NA	NA	NA
rs179137	3550077	GLRX5	SBP_meta_BF05	chr14	95991207	cis	0.155	0.0514	NA	NA	NA
rs179138	3550077	GLRX5	SBP_meta_BF05	chr14	95990728	cis	0.188	0.0781	NA	NA	NA
rs179139	3550077	GLRX5	SBP_meta_BF05	chr14	95990611	cis	0.618	0.469	NA	NA	NA
rs179141	3550077	GLRX5	SBP_meta_BF05	chr14	95989942	cis	0.194	0.09	NA	NA	NA
rs179144	3550077	GLRX5	SBP_meta_BF05	chr14	95984785	cis	0.185	0.0952	NA	NA	NA
rs179159	3550077	GLRX5	SBP_meta_BF05	chr14	95972448	cis	0.232	0.187	NA	NA	NA
rs179164	3550077	GLRX5	SBP_meta_BF05	chr14	95968058	cis	0.664	0.803	NA	NA	NA
rs1791744	3174816	ANXA1	DBP_meta_BF05	chr18	23919131	trans	0.225	0.235	NA	NA	NA
rs1791746	3174816	ANXA1	DBP_meta_BF05	chr18	23931973	trans	0.2	0.23	NA	NA	NA
rs1791758	3174816	ANXA1	DBP_meta_BF05	chr18	23944144	trans	0.214	0.227	NA	NA	NA
rs1791778	3174816	ANXA1	DBP_meta_BF05	chr18	23950415	trans	0.208	0.227	NA	NA	NA
rs1800876	3558375	GZMB	HTN_meta_BF05	chr14	24979213	cis	0.956	0.95	NA	NA	NA
rs1801144	3375735	AHNAK	SBP_meta_BF05	chr11	62381808	cis	0.188	0.169	NA	NA	NA
rs1801257	3662808	GPR56	SBP_meta_BF05/DBP_meta_BF05	chr16	57689385	cis	NA	NA	NA	NA	NA
rs1808809	3550077	GLRX5	SBP_meta_BF05	chr1	118151935	trans	0.542	0.422	NA	NA	NA
rs1813272	2491745	GNLY	SBP_meta_BF05	chr2	54984548	trans	0.794	0.408	NA	NA	NA
rs182183	3174816	ANXA1	DBP_meta_BF05	chr9	76121101	cis	0.676	0.832	NA	NA	NA
rs1823479	3662808	GPR56	SBP_meta_BF05/DBP_meta_BF05	chr16	57697795	cis	NA	NA	NA	NA	NA
rs1837115	2491745	GNLY	SBP_meta_BF05	chr2	85928411	cis	0.442	0.0966	NA	NA	NA
rs1838149	3293435	PRF1	SBP_meta_BF05/DBP_meta_BF05	chr17	33819302	trans	0.53	0.0974	NA	NA	NA
rs1838149	3959986	IL2RB	DBP_meta_BF05	chr17	33819302	trans	0.53	0.0974	NA	NA	NA
rs1848924	2491745	GNLY	SBP_meta_BF05	chr2	54976770	trans	0.489	0.449	NA	NA	NA
rs1848925	2491745	GNLY	SBP_meta_BF05	chr2	54976743	trans	0.478	0.473	NA	NA	NA
rs1860235	2761837	FGFBP2	SBP_meta_BF05	chr4	15958951	cis	0.678	0.995	NA	NA	NA
rs1861048	2761734	FBXL5	DBP_meta_BF05	chr4	15481976	cis	0.109	0.0603	NA	NA	NA
rs1862274	3830002	GRAMD1A	SBP_meta_BF05/DBP_meta_BF05	chr19	35465897	cis	0.603	0.0923	NA	NA	NA
rs1866138	2491745	GNLY	SBP_meta_BF05	chr2	85921761	cis	0.394	0.14	NA	NA	NA
rs1866139	2491745	GNLY	SBP_meta_BF05	chr2	85921389	cis	0.395	0.136	NA	NA	NA
rs1866140	2491745	GNLY	SBP_meta_BF05	chr2	85921353	cis	0.272	0.0413	NA	NA	NA
rs1866141	2491745	GNLY	SBP_meta_BF05	chr2	85925386	cis	0.42	0.0873	NA	NA	NA
rs1868677	3662808	GPR56	SBP_meta_BF05/DBP_meta_BF05	chr16	57669055	cis	0.288	0.666	NA	NA	NA
rs1868678	3662808	GPR56	SBP_meta_BF05/DBP_meta_BF05	chr16	57669441	cis	0.389	0.566	NA	NA	NA
rs187133	2508611	ARHGAP15	DBP_meta_BF05	chr2	143920386	cis	0.288	0.787	NA	NA	NA
rs1871598	3293435	PRF1	SBP_meta_BF05/DBP_meta_BF05	chr10	72236229	cis	0.606	0.887	NA	NA	NA
rs1873005	2611779	TMEM43	SBP_meta_BF05	chr3	14060223	cis	0.414	0.435	NA	NA	NA
rs1873310	2435383	S100A10	DBP_meta_BF05	chr1	151837283	cis	0.752	0.685	NA	NA	NA
rs1873311	2435383	S100A10	DBP_meta_BF05	chr1	151962222	cis	0.925	0.79	NA	NA	NA
rs1873312	2435383	S100A10	DBP_meta_BF05	chr1	151876367	cis	0.816	0.666	NA	NA	NA
rs1881535	3375735	AHNAK	SBP_meta_BF05	chr11	62121623	cis	0.661	0.0881	NA	NA	NA
rs1885108	3558375	GZMB	HTN_meta_BF05	chr14	24975509	cis	0.245	0.4	NA	NA	NA
rs1885394	3236958	VIM	DBP_meta_BF05	chr10	17243480	cis	0.505	0.872	NA	NA	NA
rs1885416	3550077	GLRX5	SBP_meta_BF05	chr14	96079560	cis	0.743	0.394	NA	NA	NA
rs1885418	3550077	GLRX5	SBP_meta_BF05	chr14	96079875	cis	0.718	0.371	NA	NA	NA
rs189560	2508611	ARHGAP15	DBP_meta_BF05	chr2	143889098	cis	0.753	0.788	NA	NA	NA
rs1897230	2435383	S100A10	DBP_meta_BF05	chr12	41647341	trans	0.532	0.93	NA	NA	NA
rs1897230	2448382	PTGS2	DBP_meta_BF05	chr12	41647341	trans	0.532	0.93	NA	NA	NA
rs189816	2508611	ARHGAP15	DBP_meta_BF05	chr2	143891026	cis	0.669	0.53	NA	NA	NA
rs190314	2883349	HAVCR2	DBP_meta_BF05	chr5	156563909	cis	0.75	0.138	NA	NA	NA
rs1908811	3174816	ANXA1	DBP_meta_BF05	chr9	76078682	cis	0.684	0.291	NA	NA	NA
rs1908812	3174816	ANXA1	DBP_meta_BF05	chr9	76078620	cis	0.758	0.326	NA	NA	NA
rs1910052	2883349	HAVCR2	DBP_meta_BF05	chr5	156429154	cis	0.421	0.176	NA	NA	NA
rs1916	2883349	HAVCR2	DBP_meta_BF05	chr22	31892121	trans	0.353	0.0706	NA	NA	NA
rs191693	3236958	VIM	DBP_meta_BF05	chr10	17331115	cis	0.154	0.391	NA	NA	NA
rs1932200	3174816	ANXA1	DBP_meta_BF05	chr9	75987228	cis	0.867	0.575	NA	NA	NA
rs1932201	3174816	ANXA1	DBP_meta_BF05	chr9	75987179	cis	0.419	0.192	NA	NA	NA
rs1932202	3174816	ANXA1	DBP_meta_BF05	chr9	75970379	cis	0.411	0.92	NA	NA	NA
rs193285	2508611	ARHGAP15	DBP_meta_BF05	chr2	143896997	cis	0.422	0.996	NA	NA	NA
rs1934074	2439842	TAGLN2	SBP_meta_BF05	chr1	159897388	cis	0.713	0.692	NA	NA	NA
rs1934075	2439842	TAGLN2	SBP_meta_BF05	chr1	159895979	cis	0.683	0.686	NA	NA	NA
rs1935316	3174816	ANXA1	DBP_meta_BF05	chr9	75732302	cis	0.958	0.653	NA	NA	NA
rs1935319	3174816	ANXA1	DBP_meta_BF05	chr9	75726979	cis	0.963	0.669	NA	NA	NA
rs1937840	2435383	S100A10	DBP_meta_BF05	chr10	5141307	trans	0.33	0.745	NA	NA	NA
rs1937845	2435383	S100A10	DBP_meta_BF05	chr10	5136148	trans	0.346	0.798	NA	NA	NA
rs1948759	2883349	HAVCR2	DBP_meta_BF05	chr5	156442657	cis	0.444	0.157	NA	NA	NA
rs1950500	3558375	GZMB	HTN_meta_BF05	chr14	24830850	cis	0.185	0.0895	Height	NFATC4	2e-18
rs1951132	3558375	GZMB	HTN_meta_BF05	chr21	39186233	cis	0.77	0.664	NA	NA	NA
rs1951132	3558375	GZMB	HTN_meta_BF05	chr7	22780833	cis	0.77	0.664	NA	NA	NA
rs1951132	3558375	GZMB	HTN_meta_BF05	chrX	95308486	cis	0.77	0.664	NA	NA	NA
rs1951132	3558375	GZMB	HTN_meta_BF05	chrX	101130329	cis	0.77	0.664	NA	NA	NA
rs1951132	3558375	GZMB	HTN_meta_BF05	chrX	105547567	cis	0.77	0.664	NA	NA	NA
rs1951132	3558375	GZMB	HTN_meta_BF05	chrX	139478785	cis	0.77	0.664	NA	NA	NA
rs1951132	3558375	GZMB	HTN_meta_BF05	chrX	147316131	cis	0.77	0.664	NA	NA	NA
rs1951132	3558375	GZMB	HTN_meta_BF05	chr10	87095155	cis	0.77	0.664	NA	NA	NA
rs1951133	3558375	GZMB	HTN_meta_BF05	chr14	24975032	cis	0.238	0.442	NA	NA	NA
rs1951138	3558375	GZMB	HTN_meta_BF05	chr14	24944121	cis	0.463	0.654	NA	NA	NA
rs1951139	3558375	GZMB	HTN_meta_BF05	chr14	24943842	cis	0.455	0.641	NA	NA	NA
rs1951140	3558375	GZMB	HTN_meta_BF05	chr14	24943817	cis	0.442	0.627	NA	NA	NA
rs1951461	3550077	GLRX5	SBP_meta_BF05	chr14	96060549	cis	0.857	0.467	NA	NA	NA
rs1951462	3550077	GLRX5	SBP_meta_BF05	chr14	96060745	cis	0.596	0.235	NA	NA	NA
rs1951463	3550077	GLRX5	SBP_meta_BF05	chr14	96060804	cis	0.596	0.228	NA	NA	NA
rs1951464	3550077	GLRX5	SBP_meta_BF05	chr14	96060839	cis	0.593	0.228	NA	NA	NA
rs1951465	3550077	GLRX5	SBP_meta_BF05	chr14	96060936	cis	0.409	0.168	NA	NA	NA
rs1951466	3550077	GLRX5	SBP_meta_BF05	chr14	96106388	cis	0.741	0.715	NA	NA	NA
rs1951589	3558375	GZMB	HTN_meta_BF05	chr14	25131299	cis	0.933	0.812	NA	NA	NA
rs1951590	3558375	GZMB	HTN_meta_BF05	chr14	25162645	cis	0.988	0.45	NA	NA	NA
rs1951594	3558375	GZMB	HTN_meta_BF05	chr14	25084632	cis	0.871	0.781	NA	NA	NA
rs1951595	3558375	GZMB	HTN_meta_BF05	chr14	25085890	cis	0.605	0.497	NA	NA	NA
rs1951597	3558375	GZMB	HTN_meta_BF05	chr14	25109761	cis	0.871	0.883	NA	NA	NA
rs1951981	3550077	GLRX5	SBP_meta_BF05	chr14	96261242	cis	0.817	0.384	NA	NA	NA
rs1956888	3558375	GZMB	HTN_meta_BF05	chr14	24935600	cis	0.828	0.867	NA	NA	NA
rs1956889	3558375	GZMB	HTN_meta_BF05	chr14	24935420	cis	0.959	0.997	NA	NA	NA
rs1956917	3558375	GZMB	HTN_meta_BF05	chr14	24980492	cis	0.411	0.502	NA	NA	NA
rs1956923	3558375	GZMB	HTN_meta_BF05	chr14	24977967	cis	0.978	0.936	NA	NA	NA
rs1956925	3558375	GZMB	HTN_meta_BF05	chr14	24971712	cis	0.842	0.85	NA	NA	NA
rs1956927	3558375	GZMB	HTN_meta_BF05	chr14	24971151	cis	0.993	0.894	NA	NA	NA
rs1956932	3558375	GZMB	HTN_meta_BF05	chr14	24967820	cis	0.937	0.883	NA	NA	NA
rs1957520	3558375	GZMB	HTN_meta_BF05	chr14	25134724	cis	0.967	0.464	NA	NA	NA
rs1957521	3558375	GZMB	HTN_meta_BF05	chr14	25139414	cis	0.158	0.528	NA	NA	NA
rs1957524	3558375	GZMB	HTN_meta_BF05	chr14	25066538	cis	0.783	0.946	NA	NA	NA
rs1957525	3558375	GZMB	HTN_meta_BF05	chr14	25070503	cis	0.687	0.569	NA	NA	NA
rs1957527	3558375	GZMB	HTN_meta_BF05	chr14	25107246	cis	0.91	0.847	NA	NA	NA
rs1957528	3558375	GZMB	HTN_meta_BF05	chr14	25107565	cis	0.822	0.943	NA	NA	NA
rs1969944	2491745	GNLY	SBP_meta_BF05	chr9	112903859	trans	0.423	0.617	NA	NA	NA
rs1973919	2982076	TAGAP	HTN_meta_BF05/SBP_meta_BF05	chr6	159440727	cis	0.566	0.311	NA	NA	NA
rs1975630	3662808	GPR56	SBP_meta_BF05/DBP_meta_BF05	chr16	57673762	cis	0.785	0.975	NA	NA	NA
rs1977064	2448382	PTGS2	DBP_meta_BF05	chr1	186874314	cis	0.643	0.673	NA	NA	NA
rs1978455	3868998	NKG7	SBP_meta_BF05	chr19	51886581	cis	0.557	0.168	NA	NA	NA
rs1978456	3868998	NKG7	SBP_meta_BF05	chr19	51886715	cis	0.635	0.821	NA	NA	NA
rs1979637	2435383	S100A10	DBP_meta_BF05	chr1	151991140	cis	0.151	0.283	NA	NA	NA
rs1979638	2435383	S100A10	DBP_meta_BF05	chr1	151990981	cis	0.955	0.557	NA	NA	NA
rs1980444	2448382	PTGS2	DBP_meta_BF05	chr1	186850960	cis	0.377	0.899	NA	NA	NA
rs1981544	3841076	MYADM	SBP_meta_BF05/DBP_meta_BF05/HTN_meta_BF05	chr12	113180322	trans	0.00114	0.00384	NA	NA	NA
rs1982395	3662808	GPR56	SBP_meta_BF05/DBP_meta_BF05	chr16	57668756	cis	0.342	0.677	NA	NA	NA
rs1990271	2761837	FGFBP2	SBP_meta_BF05	chr4	15988239	cis	0.131	0.158	NA	NA	NA
rs1990524	2761734	FBXL5	DBP_meta_BF05	chr4	15420833	cis	0.0807	0.123	NA	NA	NA
rs1990525	2761734	FBXL5	DBP_meta_BF05	chr4	15421023	cis	0.966	0.674	NA	NA	NA
rs1995377	2883349	HAVCR2	DBP_meta_BF05	chr5	156436679	cis	0.455	0.17	NA	NA	NA
rs1996417	2761837	FGFBP2	SBP_meta_BF05	chr4	16056076	cis	0.292	0.775	NA	NA	NA
rs1998503	3185498	SLC31A2	SBP_meta_BF05/DBP_meta_BF05/HTN_meta_BF05	chr9	116111407	cis	0.938	0.342	NA	NA	NA
rs1998587	3174816	ANXA1	DBP_meta_BF05	chr9	79078703	trans	0.265	0.73	NA	NA	NA
rs1998588	3174816	ANXA1	DBP_meta_BF05	chr9	79078589	trans	0.263	0.726	NA	NA	NA
rs2006771	2883349	HAVCR2	DBP_meta_BF05	chr22	31998612	trans	0.401	0.099	NA	NA	NA
rs2007316	3558375	GZMB	HTN_meta_BF05	chr14	24984343	cis	0.661	0.746	NA	NA	NA
rs2007633	2761734	FBXL5	DBP_meta_BF05	chr4	15540286	cis	0.762	0.822	NA	NA	NA
rs2010219	2448382	PTGS2	DBP_meta_BF05	chr6	14103048	trans	0.881	0.401	NA	NA	NA
rs2013854	2761837	FGFBP2	SBP_meta_BF05	chr4	16024885	cis	0.818	0.575	NA	NA	NA
rs2015246	3375735	AHNAK	SBP_meta_BF05	chr11	62196312	cis	0.53	0.234	NA	NA	NA
rs2016588	2982076	TAGAP	HTN_meta_BF05/SBP_meta_BF05	chr6	159425707	cis	0.408	0.597	NA	NA	NA
rs2018519	3830002	GRAMD1A	SBP_meta_BF05/DBP_meta_BF05	chr19	35559787	cis	0.582	0.765	NA	NA	NA
rs2025143	3550077	GLRX5	SBP_meta_BF05	chr14	96035938	cis	0.356	0.0597	NA	NA	NA
rs2025213	3558375	GZMB	HTN_meta_BF05	chr14	25141885	cis	0.988	0.499	NA	NA	NA
rs2027494	3174816	ANXA1	DBP_meta_BF05	chr9	75725871	cis	0.963	0.537	NA	NA	NA
rs2028898	2491745	GNLY	SBP_meta_BF05	chr2	85777270	cis	0.829	0.222	NA	NA	NA
rs2031935	3558375	GZMB	HTN_meta_BF05	chr14	25213373	cis	0.469	0.962	NA	NA	NA
rs2033475	2883349	HAVCR2	DBP_meta_BF05	chr5	156543695	cis	0.369	0.172	NA	NA	NA
rs2033824	2491745	GNLY	SBP_meta_BF05	chr2	55056076	trans	0.88	0.417	NA	NA	NA
rs2033865	2761837	FGFBP2	SBP_meta_BF05	chr2	175088865	trans	0.0983	0.529	NA	NA	NA
rs2033866	2761837	FGFBP2	SBP_meta_BF05	chr2	175089029	trans	0.111	0.547	NA	NA	NA
rs2036402	2883349	HAVCR2	DBP_meta_BF05	chr5	156464242	cis	0.701	0.8	NA	NA	NA
rs2038574	3236958	VIM	DBP_meta_BF05	chr10	17241705	cis	0.482	0.921	NA	NA	NA
rs2038575	3236958	VIM	DBP_meta_BF05	chr10	17221430	cis	0.458	0.838	NA	NA	NA
rs2038576	3236958	VIM	DBP_meta_BF05	chr10	17218503	cis	0.462	0.837	NA	NA	NA
rs2038577	3236958	VIM	DBP_meta_BF05	chr10	17196093	cis	0.493	0.72	NA	NA	NA
rs2039979	3174816	ANXA1	DBP_meta_BF05	chr9	75720079	cis	0.905	0.323	NA	NA	NA
rs2040349	2491745	GNLY	SBP_meta_BF05	chr2	85889525	cis	0.923	0.783	NA	NA	NA
rs2041671	2761734	FBXL5	DBP_meta_BF05	chr4	15552198	cis	0.367	0.146	NA	NA	NA
rs2041672	2761734	FBXL5	DBP_meta_BF05	chr4	15552295	cis	0.286	0.0379	NA	NA	NA
rs2041673	2761734	FBXL5	DBP_meta_BF05	chr4	15552423	cis	0.31	0.036	NA	NA	NA
rs20417	2448382	PTGS2	DBP_meta_BF05	chr1	186650321	cis	NA	NA	NA	NA	NA
rs2043675	2491745	GNLY	SBP_meta_BF05	chr2	85769975	cis	0.832	0.217	NA	NA	NA
rs2043760	2491745	GNLY	SBP_meta_BF05	chr2	85921992	cis	0.695	0.861	NA	NA	NA
rs2043930	2508611	ARHGAP15	DBP_meta_BF05	chr2	143862120	cis	0.521	0.369	NA	NA	NA
[truncated: 2,440 more rows]
